# Supplementary material
Source: PubMed Central journal article supplement (PMC5988241)
Supplement: NIHMS968854-supplement-supplement_1.pdf [file NIHMS968854-supplement-supplement_1.pdf]

**Table S1.** Full hard corona proteins associated with SPIONs incubated in media (containing 10% HS), as identified by LC MS/MS (data for 3 individual samples were provided).

### Sample 1

| Description                                                                                  | NpS<br>pC |
|----------------------------------------------------------------------------------------------|-----------|
| >sp P02647 APOA1_HUMAN Apolipoprotein A-I OS=Homo sapiens GN=APOA1 PE=1 SV=1                 | 6.13      |
| >sp ALBU_HUMAN (Common contaminant protein)                                                  | 4.25      |
| >sp P02649 APOE_HUMAN Apolipoprotein E OS=Homo sapiens GN=APOE PE=1 SV=1                     | 4.16      |
| >sp P0CG05 LAC2_HUMAN Ig lambda-2 chain C regions OS=Homo sapiens GN=IGLC2<br>PE=1 SV=1      | 3.74      |
| >sp P04114 APOB_HUMAN Apolipoprotein B-100 OS=Homo sapiens GN=APOB PE=1 SV=2                 | 2.28      |
| >sp P02654 APOC1_HUMAN Apolipoprotein C-I OS=Homo sapiens GN=APOC1 PE=1 SV=1                 | 2.26      |
| >sp P02656 APOC3_HUMAN Apolipoprotein C-III OS=Homo sapiens GN=APOC3 PE=1<br>SV=1            | 2.18      |
| >sp P02652 APOA2_HUMAN Apolipoprotein A-II OS=Homo sapiens GN=APOA2 PE=1 SV=1                | 2.16      |
| >sp P01024 CO3_HUMAN Complement C3 OS=Homo sapiens GN=C3 PE=1 SV=2                           | 1.68      |
| >sp P55056 APOC4_HUMAN Apolipoprotein C-IV OS=Homo sapiens GN=APOC4 PE=1<br>SV=1             | 1.65      |
| >sp P02655 APOC2_HUMAN Apolipoprotein C-II OS=Homo sapiens GN=APOC2 PE=1 SV=1                | 1.64      |
| >sp P35542 SAA4_HUMAN Serum amyloid A-4 protein OS=Homo sapiens GN=SAA4 PE=1<br>SV=2         | 1.33      |
| >sp P00738 HPT_HUMAN Haptoglobin OS=Homo sapiens GN=HP PE=1 SV=1                             | 1.23      |
| >sp P01876 IGHA1_HUMAN Ig alpha-1 chain C region OS=Homo sapiens GN=IGHA1 PE=1<br>SV=2       | 1.20      |
| >sp P06727 APOA4_HUMAN Apolipoprotein A-IV OS=Homo sapiens GN=APOA4 PE=1<br>SV=3             | 1.15      |
| >sp TRFE_HUMAN (Common contaminant protein)                                                  | 1.06      |
| >sp P01834 IGKC_HUMAN Ig kappa chain C region OS=Homo sapiens GN=IGKC PE=1<br>SV=1           | 1.02      |
| >sp P01009 A1AT_HUMAN Alpha-1-antitrypsin OS=Homo sapiens GN=SERPINA1 PE=1<br>SV=3           | 1.02      |
| >sp P05090 APOD_HUMAN Apolipoprotein D OS=Homo sapiens GN=APOD PE=1 SV=1                     | 0.88      |
| >sp P01871 IGHM_HUMAN Ig mu chain C region OS=Homo sapiens GN=IGHM PE=1 SV=3                 | 0.86      |
| >sp O95445 APOM_HUMAN Apolipoprotein M OS=Homo sapiens GN=APOM PE=1 SV=2                     | 0.81      |
| >sp P01859 IGHG2_HUMAN Ig gamma-2 chain C region OS=Homo sapiens GN=IGHG2<br>PE=1 SV=2       | 0.80      |
| >sp P02735 SAA_HUMAN Serum amyloid A protein OS=Homo sapiens GN=SAA1 PE=1<br>SV=2            | 0.77      |
| >sp P02774 VTDB_HUMAN Vitamin D-binding protein OS=Homo sapiens GN=GC PE=1<br>SV=1           | 0.75      |
| >sp P04004 VTNC_HUMAN Vitronectin OS=Homo sapiens GN=VTN PE=1 SV=1                           | 0.72      |
| >sp P10909 CLUS_HUMAN Clusterin OS=Homo sapiens GN=CLU PE=1 SV=1                             | 0.66      |
| >sp P0C0L5 CO4B_HUMAN Complement C4-B OS=Homo sapiens GN=C4B PE=1 SV=1                       | 0.65      |
| >sp O14791 APOL1_HUMAN Apolipoprotein L1 OS=Homo sapiens GN=APOL1 PE=1 SV=5                  | 0.65      |
| >sp P01042-2 KNG1_HUMAN Isoform LMW of Kininogen-1 OS=Homo sapiens GN=KNG1                   | 0.64      |
| >sp P02766 TTHY_HUMAN Transthyretin OS=Homo sapiens GN=TTR PE=1 SV=1                         | 0.64      |
| >sp P02749 APOH_HUMAN Beta-2-glycoprotein 1 OS=Homo sapiens GN=APOH PE=1 SV=3                | 0.63      |
| >sp P01623 KV305_HUMAN Ig kappa chain V-III region WOL OS=Homo sapiens PE=1 SV=1             | 0.60      |
| >sp P04003 C4BPA_HUMAN C4b-binding protein alpha chain OS=Homo sapiens<br>GN=C4BPA PE=1 SV=2 | 0.58      |
| >sp P02790 HEMO_HUMAN Hemopexin OS=Homo sapiens GN=HPX PE=1 SV=2                             | 0.58      |

|                                                                                                        |      |
|--------------------------------------------------------------------------------------------------------|------|
| >sp P02763 A1AG1_HUMAN Alpha-1-acid glycoprotein 1 OS=Homo sapiens GN=ORM1 PE=1 SV=1                   | 0.57 |
| >sp P01023 A2MG_HUMAN Alpha-2-macroglobulin OS=Homo sapiens GN=A2M PE=1 SV=3                           | 0.57 |
| >sp P02760 AMBP_HUMAN Protein AMBP OS=Homo sapiens GN=AMBP PE=1 SV=1                                   | 0.55 |
| >sp P68871 HBB_HUMAN Hemoglobin subunit beta OS=Homo sapiens GN=HBB PE=1 SV=2                          | 0.54 |
| >sp P00734 THRB_HUMAN Prothrombin OS=Homo sapiens GN=F2 PE=1 SV=2                                      | 0.52 |
| >sp P01591 IGJ_HUMAN Immunoglobulin J chain OS=Homo sapiens GN=IGJ PE=1 SV=4                           | 0.50 |
| >sp P02768 ALBU_HUMAN Serum albumin OS=Homo sapiens GN=ALB PE=1 SV=2                                   | 0.50 |
| >sp P01008 ANT3_HUMAN Antithrombin-III OS=Homo sapiens GN=SERPINC1 PE=1 SV=1                           | 0.50 |
| >sp P01781 HV320_HUMAN Ig heavy chain V-III region GAL OS=Homo sapiens PE=1 SV=1                       | 0.50 |
| >sp P60709 ACTB_HUMAN Actin, cytoplasmic 1 OS=Homo sapiens GN=ACTB PE=1 SV=1                           | 0.48 |
| >sp P01857 IGHG1_HUMAN Ig gamma-1 chain C region OS=Homo sapiens GN=IGHG1 PE=1 SV=1                    | 0.48 |
| >sp Q6Q788 APOA5_HUMAN Apolipoprotein A-V OS=Homo sapiens GN=APOA5 PE=1 SV=1                           | 0.47 |
| >sp P27169 PON1_HUMAN Serum paraoxonase/arylesterase 1 OS=Homo sapiens GN=PON1 PE=1 SV=3               | 0.47 |
| >sp P84077 ARF1_HUMAN ADP-ribosylation factor 1 OS=Homo sapiens GN=ARF1 PE=1 SV=2                      | 0.44 |
| >sp P08603 CFAH_HUMAN Complement factor H OS=Homo sapiens GN=CFH PE=1 SV=4                             | 0.43 |
| >sp P13671 CO6_HUMAN Complement component C6 OS=Homo sapiens GN=C6 PE=1 SV=3                           | 0.43 |
| >sp P19652 A1AG2_HUMAN Alpha-1-acid glycoprotein 2 OS=Homo sapiens GN=ORM2 PE=1 SV=2                   | 0.43 |
| >sp P04196 HRG_HUMAN Histidine-rich glycoprotein OS=Homo sapiens GN=HRG PE=1 SV=1                      | 0.43 |
| >sp P06396 GELS_HUMAN Gelsolin OS=Homo sapiens GN=GSN PE=1 SV=1                                        | 0.42 |
| >sp P01011 AACT_HUMAN Alpha-1-antichymotrypsin OS=Homo sapiens GN=SERPINA3 PE=1 SV=2                   | 0.41 |
| >sp P19823 ITIH2_HUMAN Inter-alpha-trypsin inhibitor heavy chain H2 OS=Homo sapiens GN=ITIH2 PE=1 SV=2 | 0.40 |
| >sp P80748 LV302_HUMAN Ig lambda chain V-III region LOI OS=Homo sapiens PE=1 SV=1                      | 0.39 |
| >sp O43866 CD5L_HUMAN CD5 antigen-like OS=Homo sapiens GN=CD5L PE=1 SV=1                               | 0.37 |
| >sp P04220 MUCB_HUMAN Ig mu heavy chain disease protein OS=Homo sapiens PE=1 SV=1                      | 0.37 |
| >sp P07358 CO8B_HUMAN Complement component C8 beta chain OS=Homo sapiens GN=C8B PE=1 SV=3              | 0.37 |
| >sp Q14624 ITIH4_HUMAN Inter-alpha-trypsin inhibitor heavy chain H4 OS=Homo sapiens GN=ITIH4 PE=1 SV=4 | 0.36 |
| >sp P00450 CERU_HUMAN Ceruloplasmin OS=Homo sapiens GN=CP PE=1 SV=1                                    | 0.36 |
| >sp P05452 TETN_HUMAN Tetranectin OS=Homo sapiens GN=CLEC3B PE=1 SV=3                                  | 0.36 |
| >sp P02776 PLF4_HUMAN Platelet factor 4 OS=Homo sapiens GN=PF4 PE=1 SV=2                               | 0.36 |
| >sp P00747 PLMN_HUMAN Plasminogen OS=Homo sapiens GN=PLG PE=1 SV=2                                     | 0.36 |
| >sp P00739 HPTR_HUMAN Haptoglobin-related protein OS=Homo sapiens GN=HPR PE=1 SV=2                     | 0.35 |
| >sp P04406 G3P_HUMAN Glyceraldehyde-3-phosphate dehydrogenase OS=Homo sapiens GN=GAPDH PE=1 SV=3       | 0.34 |
| >sp P0CG04 LAC1_HUMAN Ig lambda-1 chain C regions OS=Homo sapiens GN=IGLC1 PE=1 SV=1                   | 0.34 |
| >sp P01610 KV118_HUMAN Ig kappa chain V-I region WEA OS=Homo sapiens PE=1 SV=1                         | 0.33 |
| >sp P03952 KLKB1_HUMAN Plasma kallikrein OS=Homo sapiens GN=KLKB1 PE=1 SV=1                            | 0.33 |
| >sp A8MW06 TMSL3_HUMAN Thymosin beta-4-like protein 3 OS=Homo sapiens GN=TMSL3 PE=2 SV=1               | 0.33 |
| >sp P27918 PROP_HUMAN Properdin OS=Homo sapiens GN=CFP PE=1 SV=2                                       | 0.32 |

|    |                                           |                                                                                 |      |
|----|-------------------------------------------|---------------------------------------------------------------------------------|------|
| 1  |                                           |                                                                                 |      |
| 2  |                                           |                                                                                 |      |
| 3  | >sp P02765 FETUA_HUMAN                    | Alpha-2-HS-glycoprotein OS=Homo sapiens GN=AHSG PE=1 SV=1                       | 0.31 |
| 4  |                                           |                                                                                 |      |
| 5  | >sp P02746 C1QB_HUMAN                     | Complement C1q subcomponent subunit B OS=Homo sapiens GN=C1QB PE=1 SV=3         | 0.31 |
| 6  |                                           |                                                                                 |      |
| 7  | >sp TRYP_PIG (Common contaminant protein) |                                                                                 | 0.31 |
| 8  | >sp P02748 CO9_HUMAN                      | Complement component C9 OS=Homo sapiens GN=C9 PE=1 SV=2                         | 0.31 |
| 9  |                                           |                                                                                 |      |
| 10 | >sp P69905 HBA_HUMAN                      | Hemoglobin subunit alpha OS=Homo sapiens GN=HBA1 PE=1 SV=2                      | 0.30 |
| 11 |                                           |                                                                                 |      |
| 12 | >sp Q9BXR6 FHR5_HUMAN                     | Complement factor H-related protein 5 OS=Homo sapiens GN=CFHR5 PE=1 SV=1        | 0.30 |
| 13 |                                           |                                                                                 |      |
| 14 | >sp P05546 HEP2_HUMAN                     | Heparin cofactor 2 OS=Homo sapiens GN=SERPIND1 PE=1 SV=3                        | 0.30 |
| 15 |                                           |                                                                                 |      |
| 16 | >sp P00751 CFAB_HUMAN                     | Complement factor B OS=Homo sapiens GN=CFB PE=1 SV=2                            | 0.30 |
| 17 | >sp P19827 ITIH1_HUMAN                    | Inter-alpha-trypsin inhibitor heavy chain H1 OS=Homo sapiens GN=ITIH1 PE=1 SV=3 | 0.30 |
| 18 |                                           |                                                                                 |      |
| 19 | >sp P01766 HV305_HUMAN                    | Ig heavy chain V-III region BRO OS=Homo sapiens PE=1 SV=1                       | 0.30 |
| 20 | >sp P18428 LBP_HUMAN                      | Lipopolysaccharide-binding protein OS=Homo sapiens GN=LBP PE=1 SV=3             | 0.30 |
| 21 |                                           |                                                                                 |      |
| 22 | >sp P10643 CO7_HUMAN                      | Complement component C7 OS=Homo sapiens GN=C7 PE=1 SV=2                         | 0.30 |
| 23 |                                           |                                                                                 |      |
| 24 | >sp P49913 CAMP_HUMAN                     | Cathelicidin antimicrobial peptide OS=Homo sapiens GN=CAMP PE=1 SV=1            | 0.30 |
| 25 |                                           |                                                                                 |      |
| 26 | >sp P00736 C1R_HUMAN                      | Complement C1r subcomponent OS=Homo sapiens GN=C1R PE=1 SV=2                    | 0.30 |
| 27 |                                           |                                                                                 |      |
| 28 | >sp P01031 CO5_HUMAN                      | Complement C5 OS=Homo sapiens GN=C5 PE=1 SV=4                                   | 0.29 |
| 29 | >sp Q9UHG3 PCYOX_HUMAN                    | Preylcysteine oxidase 1 OS=Homo sapiens GN=PCYOX1 PE=1 SV=3                     | 0.29 |
| 30 |                                           |                                                                                 |      |
| 31 | >sp P07360 CO8G_HUMAN                     | Complement component C8 gamma chain OS=Homo sapiens GN=C8G PE=1 SV=3            | 0.29 |
| 32 |                                           |                                                                                 |      |
| 33 | >sp Q6F113 H2A2A_HUMAN                    | Histone H2A type 2-A OS=Homo sapiens GN=HIST2H2AA3 PE=1 SV=3                    | 0.28 |
| 34 |                                           |                                                                                 |      |
| 35 | >sp P61224 RAP1B_HUMAN                    | Ras-related protein Rap-1b OS=Homo sapiens GN=RAP1B PE=1 SV=1                   | 0.27 |
| 36 |                                           |                                                                                 |      |
| 37 | >sp P63000-2 RAC1_HUMAN                   | Isoform B of Ras-related C3 botulinum toxin substrate 1 OS=Homo sapiens GN=RAC1 | 0.27 |
| 38 |                                           |                                                                                 |      |
| 39 | >sp P07357 CO8A_HUMAN                     | Complement component C8 alpha chain OS=Homo sapiens GN=C8A PE=1 SV=2            | 0.27 |
| 40 |                                           |                                                                                 |      |
| 41 | >sp P01861 IGHG4_HUMAN                    | Ig gamma-4 chain C region OS=Homo sapiens GN=IGHG4 PE=1 SV=1                    | 0.26 |
| 42 |                                           |                                                                                 |      |
| 43 | >sp P11597 CETP_HUMAN                     | Cholesteryl ester transfer protein OS=Homo sapiens GN=CETP PE=1 SV=2            | 0.26 |
| 44 |                                           |                                                                                 |      |
| 45 | >sp P22352 GPX3_HUMAN                     | Glutathione peroxidase 3 OS=Homo sapiens GN=GPX3 PE=1 SV=2                      | 0.26 |
| 46 |                                           |                                                                                 |      |
| 47 | >sp P29622 KAIN_HUMAN                     | Kallistatin OS=Homo sapiens GN=SERPINA4 PE=1 SV=3                               | 0.25 |
| 48 | >sp Q8TDL5 BPIB1_HUMAN                    | BPI fold-containing family B member 1 OS=Homo sapiens GN=BPIFB1 PE=2 SV=1       | 0.25 |
| 49 |                                           |                                                                                 |      |
| 50 | >sp P43652 AFAM_HUMAN                     | Afamin OS=Homo sapiens GN=AFM PE=1 SV=1                                         | 0.25 |
| 51 | >sp P09871 C1S_HUMAN                      | Complement C1s subcomponent OS=Homo sapiens GN=C1S PE=1 SV=1                    | 0.25 |
| 52 |                                           |                                                                                 |      |
| 53 | >sp P02753 RET4_HUMAN                     | Retinol-binding protein 4 OS=Homo sapiens GN=RBP4 PE=1 SV=3                     | 0.25 |
| 54 |                                           |                                                                                 |      |
| 55 | >sp P04433 KV309_HUMAN                    | Ig kappa chain V-III region VG (Fragment) OS=Homo sapiens PE=1 SV=1             | 0.25 |
| 56 |                                           |                                                                                 |      |
| 57 | >sp P01765 HV304_HUMAN                    | Ig heavy chain V-III region TIL OS=Homo sapiens PE=1 SV=1                       | 0.25 |
| 58 |                                           |                                                                                 |      |
| 59 |                                           |                                                                                 |      |
| 60 |                                           |                                                                                 |      |

|                                                                                                                                 |      |
|---------------------------------------------------------------------------------------------------------------------------------|------|
| >sp P12273 PIP_HUMAN Prolactin-inducible protein OS=Homo sapiens GN=PIP PE=1 SV=1                                               | 0.25 |
| >sp P08519 APOA_HUMAN Apolipoprotein(a) OS=Homo sapiens GN=LPA PE=1 SV=1                                                        | 0.24 |
| >sp P07225 PROS_HUMAN Vitamin K-dependent protein S OS=Homo sapiens GN=PROS1 PE=1 SV=1                                          | 0.23 |
| >sp P04217 A1BG_HUMAN Alpha-1B-glycoprotein OS=Homo sapiens GN=A1BG PE=1 SV=4                                                   | 0.23 |
| >sp P59665 DEF1_HUMAN Neutrophil defensin 1 OS=Homo sapiens GN=DEFA1 PE=1 SV=1                                                  | 0.23 |
| >sp P20851 C4BPB_HUMAN C4b-binding protein beta chain OS=Homo sapiens GN=C4BPB PE=1 SV=1                                        | 0.23 |
| >sp P62807 H2B1C_HUMAN Histone H2B type 1-C/E/F/G/I OS=Homo sapiens GN=HIST1H2BC PE=1 SV=4                                      | 0.23 |
| >sp P05156 CFAI_HUMAN Complement factor I OS=Homo sapiens GN=CFI PE=1 SV=2                                                      | 0.22 |
| >sp P08697 A2AP_HUMAN Alpha-2-antiplasmin OS=Homo sapiens GN=SERPINF2 PE=1 SV=3                                                 | 0.22 |
| >sp P05155 IC1_HUMAN Plasma protease C1 inhibitor OS=Homo sapiens GN=SERPING1 PE=1 SV=2                                         | 0.22 |
| >sp P01621 KV303_HUMAN Ig kappa chain V-III region NG9 (Fragment) OS=Homo sapiens PE=1 SV=1                                     | 0.22 |
| >sp P35858 ALS_HUMAN Insulin-like growth factor-binding protein complex acid labile subunit OS=Homo sapiens GN=IGFALS PE=1 SV=1 | 0.21 |
| >sp P01042 KNG1_HUMAN Kininogen-1 OS=Homo sapiens GN=KNG1 PE=1 SV=2                                                             | 0.21 |
| >sp P08571 CD14_HUMAN Monocyte differentiation antigen CD14 OS=Homo sapiens GN=CD14 PE=1 SV=2                                   | 0.21 |
| >sp Q9UK55 ZPI_HUMAN Protein Z-dependent protease inhibitor OS=Homo sapiens GN=SERPINA10 PE=1 SV=1                              | 0.21 |
| >sp P01860 IGHG3_HUMAN Ig gamma-3 chain C region OS=Homo sapiens GN=IGHG3 PE=1 SV=2                                             | 0.21 |
| >sp P62805 H4_HUMAN Histone H4 OS=Homo sapiens GN=HIST1H4A PE=1 SV=2                                                            | 0.21 |
| >sp P10720 PF4V_HUMAN Platelet factor 4 variant OS=Homo sapiens GN=PF4V1 PE=1 SV=1                                              | 0.21 |
| >sp P63104 1433Z_HUMAN 14-3-3 protein zeta/delta OS=Homo sapiens GN=YWHAZ PE=1 SV=1                                             | 0.21 |
| >sp Q5T750 XP32_HUMAN Skin-specific protein 32 OS=Homo sapiens GN=XP32 PE=1 SV=1                                                | 0.20 |
| >sp P01598 KV106_HUMAN Ig kappa chain V-I region EU OS=Homo sapiens PE=1 SV=1                                                   | 0.20 |
| >sp P01714 LV301_HUMAN Ig lambda chain V-III region SH OS=Homo sapiens PE=1 SV=1                                                | 0.20 |
| >sp P35326 SPR2A_HUMAN Small proline-rich protein 2A OS=Homo sapiens GN=SPRR2A PE=2 SV=1                                        | 0.20 |
| >sp Q03591 FHR1_HUMAN Complement factor H-related protein 1 OS=Homo sapiens GN=CFHR1 PE=1 SV=2                                  | 0.20 |
| >sp Q5TA81 LCE2C_HUMAN Late cornified envelope protein 2C OS=Homo sapiens GN=LCE2C PE=2 SV=1                                    | 0.20 |
| >sp P81605 DCD_HUMAN Dermcidin OS=Homo sapiens GN=DCD PE=1 SV=2                                                                 | 0.20 |
| >sp P23142 FBLN1_HUMAN Fibulin-1 OS=Homo sapiens GN=FBLN1 PE=1 SV=4                                                             | 0.19 |
| >sp P01613 KV121_HUMAN Ig kappa chain V-I region Ni OS=Homo sapiens PE=1 SV=1                                                   | 0.19 |
| >sp P05089 ARG1_HUMAN Arginase-1 OS=Homo sapiens GN=ARG1 PE=1 SV=2                                                              | 0.18 |
| >sp P01019 ANGT_HUMAN Angiotensinogen OS=Homo sapiens GN=AGT PE=1 SV=1                                                          | 0.18 |
| >sp P02747 C1QC_HUMAN Complement C1q subcomponent subunit C OS=Homo sapiens GN=C1QC PE=1 SV=3                                   | 0.18 |
| >sp P00748 FA12_HUMAN Coagulation factor XII OS=Homo sapiens GN=F12 PE=1 SV=3                                                   | 0.18 |
| >sp Q96PD5 PGRP2_HUMAN N-acetylmuramoyl-L-alanine amidase OS=Homo sapiens GN=PGLYRP2 PE=1 SV=1                                  | 0.18 |
| >sp Q92496 FHR4_HUMAN Complement factor H-related protein 4 OS=Homo sapiens GN=CFHR4 PE=1 SV=2                                  | 0.17 |
| >sp P05543 THBG_HUMAN Thyroxine-binding globulin OS=Homo sapiens GN=SERPINA7                                                    | 0.17 |

|    |                                                                                   |      |
|----|-----------------------------------------------------------------------------------|------|
| 1  |                                                                                   |      |
| 2  |                                                                                   |      |
| 3  |                                                                                   |      |
| 4  | PE=1 SV=2                                                                         |      |
| 5  | >sp P08514 ITA2B_HUMAN Integrin alpha-IIb OS=Homo sapiens GN=ITGA2B PE=1 SV=3     | 0.17 |
| 6  | >sp P02768-2 ALBU_HUMAN Isoform 2 of Serum albumin OS=Homo sapiens GN=ALB         | 0.17 |
| 7  | >sp P06681 CO2_HUMAN Complement C2 OS=Homo sapiens GN=C2 PE=1 SV=2                | 0.17 |
| 8  | >sp P01772 HV311_HUMAN Ig heavy chain V-III region KOL OS=Homo sapiens PE=1 SV=1  | 0.17 |
| 9  | >sp P01880 IGHD_HUMAN Ig delta chain C region OS=Homo sapiens GN=IGHD PE=1 SV=2   | 0.17 |
| 10 | >sp P06313 KV403_HUMAN Ig kappa chain V-IV region JI OS=Homo sapiens PE=4 SV=1    | 0.16 |
| 11 | >sp P35321 SPR1A_HUMAN Cornifin-A OS=Homo sapiens GN=SPRR1A PE=1 SV=2             | 0.16 |
| 12 | >sp P02786 TFR1_HUMAN Transferrin receptor protein 1 OS=Homo sapiens GN=TFRC      | 0.16 |
| 13 | PE=1 SV=2                                                                         |      |
| 14 | >sp P30464 1B15_HUMAN HLA class I histocompatibility antigen, B-15 alpha chain    | 0.16 |
| 15 | OS=Homo sapiens GN=HLA-B PE=1 SV=2                                                |      |
| 16 | >sp Q13790 APOF_HUMAN Apolipoprotein F OS=Homo sapiens GN=APOF PE=1 SV=2          | 0.15 |
| 17 | >sp Q14520 HABP2_HUMAN Hyaluronan-binding protein 2 OS=Homo sapiens GN=HABP2      | 0.15 |
| 18 | PE=1 SV=1                                                                         |      |
| 19 | >sp P35247 SFTPD_HUMAN Pulmonary surfactant-associated protein D OS=Homo sapiens  | 0.15 |
| 20 | GN=SFTPD PE=1 SV=3                                                                |      |
| 21 | >sp P01877 IGHA2_HUMAN Ig alpha-2 chain C region OS=Homo sapiens GN=IGHA2 PE=1    | 0.15 |
| 22 | SV=3                                                                              |      |
| 23 | >sp P06331 HV209_HUMAN Ig heavy chain V-II region ARH-77 OS=Homo sapiens PE=4     | 0.15 |
| 24 | SV=1                                                                              |      |
| 25 | >sp P07996 TSP1_HUMAN Thrombospondin-1 OS=Homo sapiens GN=THBS1 PE=1 SV=2         | 0.15 |
| 26 | >sp P04180 LCAT_HUMAN Phosphatidylcholine-sterol acyltransferase OS=Homo sapiens  | 0.15 |
| 27 | GN=LCAT PE=1 SV=1                                                                 |      |
| 28 | >sp P02042 HBD_HUMAN Hemoglobin subunit delta OS=Homo sapiens GN=HBD PE=1         | 0.15 |
| 29 | SV=2                                                                              |      |
| 30 | >sp Q9NR31 SAR1A_HUMAN GTP-binding protein SAR1a OS=Homo sapiens GN=SAR1A         | 0.15 |
| 31 | PE=1 SV=1                                                                         |      |
| 32 | >sp P22792 CPN2_HUMAN Carboxypeptidase N subunit 2 OS=Homo sapiens GN=CPN2        | 0.15 |
| 33 | PE=1 SV=3                                                                         |      |
| 34 | >sp P04278 SHBG_HUMAN Sex hormone-binding globulin OS=Homo sapiens GN=SHBG        | 0.14 |
| 35 | PE=1 SV=2                                                                         |      |
| 36 | >sp P36955 PEDF_HUMAN Pigment epithelium-derived factor OS=Homo sapiens           | 0.14 |
| 37 | GN=SERPINF1 PE=1 SV=4                                                             |      |
| 38 | >sp P01597 KV105_HUMAN Ig kappa chain V-I region DEE OS=Homo sapiens PE=1 SV=1    | 0.13 |
| 39 | >sp P01611 KV119_HUMAN Ig kappa chain V-I region Wes OS=Homo sapiens PE=1 SV=1    | 0.13 |
| 40 | >sp P01604 KV112_HUMAN Ig kappa chain V-I region Kue OS=Homo sapiens PE=1 SV=1    | 0.13 |
| 41 | >sp P49908 SEPP1_HUMAN Selenoprotein P OS=Homo sapiens GN=SEPP1 PE=1 SV=3         | 0.13 |
| 42 | >sp P55058 PLTP_HUMAN Phospholipid transfer protein OS=Homo sapiens GN=PLTP       | 0.13 |
| 43 | PE=1 SV=1                                                                         |      |
| 44 | >sp Q02413 DSG1_HUMAN Desmoglein-1 OS=Homo sapiens GN=DSG1 PE=1 SV=2              | 0.13 |
| 45 | >sp P23528 COF1_HUMAN Cofilin-1 OS=Homo sapiens GN=CFL1 PE=1 SV=3                 | 0.13 |
| 46 | >sp P01701 LV103_HUMAN Ig lambda chain V-I region NEW OS=Homo sapiens PE=1 SV=1   | 0.13 |
| 47 | >sp P01700 LV102_HUMAN Ig lambda chain V-I region HA OS=Homo sapiens PE=1 SV=1    | 0.13 |
| 48 | >sp P05106 ITB3_HUMAN Integrin beta-3 OS=Homo sapiens GN=ITGB3 PE=1 SV=2          | 0.13 |
| 49 | >sp P51884 LUM_HUMAN Lumican OS=Homo sapiens GN=LUM PE=1 SV=2                     | 0.13 |
| 50 | >sp P01617 KV204_HUMAN Ig kappa chain V-II region TEW OS=Homo sapiens PE=1 SV=1   | 0.13 |
| 51 | >sp P01763 HV302_HUMAN Ig heavy chain V-III region WEA OS=Homo sapiens PE=1 SV=1  | 0.13 |
| 52 | >sp Q9Y5C1 ANGL3_HUMAN Angiopoietin-related protein 3 OS=Homo sapiens             | 0.13 |
| 53 | GN=ANGPTL3 PE=1 SV=1                                                              |      |
| 54 | >sp P01767 HV306_HUMAN Ig heavy chain V-III region BUT OS=Homo sapiens PE=1 SV=1  | 0.13 |
| 55 | >sp P02750 A2GL_HUMAN Leucine-rich alpha-2-glycoprotein OS=Homo sapiens GN=LRG1   | 0.12 |
| 56 | PE=1 SV=2                                                                         |      |
| 57 | >sp Q96P63 SPB12_HUMAN Serpin B12 OS=Homo sapiens GN=SERPINB12 PE=1 SV=1          | 0.12 |
| 58 | >sp P01764 HV303_HUMAN Ig heavy chain V-III region VH26 OS=Homo sapiens PE=1 SV=1 | 0.12 |

|                                                                                                                   |      |
|-------------------------------------------------------------------------------------------------------------------|------|
| >sp P01743 HV102_HUMAN Ig heavy chain V-I region HG3 OS=Homo sapiens PE=4 SV=1                                    | 0.12 |
| >sp P16671 CD36_HUMAN Platelet glycoprotein 4 OS=Homo sapiens GN=CD36 PE=1 SV=2                                   | 0.12 |
| >sp Q9HDC9 APMAP_HUMAN Adipocyte plasma membrane-associated protein OS=Homo sapiens GN=APMAP PE=1 SV=2            | 0.12 |
| >sp P61769 B2MG_HUMAN Beta-2-microglobulin OS=Homo sapiens GN=B2M PE=1 SV=1                                       | 0.12 |
| >sp P00558 PGK1_HUMAN Phosphoglycerate kinase 1 OS=Homo sapiens GN=PGK1 PE=1 SV=3                                 | 0.12 |
| >sp P25311 ZA2G_HUMAN Zinc-alpha-2-glycoprotein OS=Homo sapiens GN=AZGP1 PE=1 SV=2                                | 0.12 |
| >sp P80108 PHLD_HUMAN Phosphatidylinositol-glycan-specific phospholipase D OS=Homo sapiens GN=GPLD1 PE=1 SV=3     | 0.12 |
| >sp Q96IY4-2 CBPB2_HUMAN Isoform 2 of Carboxypeptidase B2 OS=Homo sapiens GN=CPB2                                 | 0.12 |
| >sp O00299 CLIC1_HUMAN Chloride intracellular channel protein 1 OS=Homo sapiens GN=CLIC1 PE=1 SV=4                | 0.12 |
| >sp P31944 CASPE_HUMAN Caspase-14 OS=Homo sapiens GN=CASP14 PE=1 SV=2                                             | 0.12 |
| >sp ALBU_BOVIN (Common contaminant protein)                                                                       | 0.12 |
| >sp P03951 FA11_HUMAN Coagulation factor XI OS=Homo sapiens GN=F11 PE=1 SV=1                                      | 0.12 |
| >sp Q96KN2 CNDP1_HUMAN Beta-Ala-His dipeptidase OS=Homo sapiens GN=CNDP1 PE=1 SV=4                                | 0.11 |
| >sp P12259 FA5_HUMAN Coagulation factor V OS=Homo sapiens GN=F5 PE=1 SV=4                                         | 0.11 |
| >sp P02775 CXCL7_HUMAN Platelet basic protein OS=Homo sapiens GN=PPBP PE=1 SV=3                                   | 0.11 |
| >sp P61586 RHOA_HUMAN Transforming protein RhoA OS=Homo sapiens GN=RHOA PE=1 SV=1                                 | 0.11 |
| >sp Q13418 ILK_HUMAN Integrin-linked protein kinase OS=Homo sapiens GN=ILK PE=1 SV=2                              | 0.11 |
| >sp P00740 FA9_HUMAN Coagulation factor IX OS=Homo sapiens GN=F9 PE=1 SV=2                                        | 0.11 |
| >sp P02751 FINC_HUMAN Fibronectin OS=Homo sapiens GN=FN1 PE=1 SV=4                                                | 0.11 |
| >sp Q06830 PRDX1_HUMAN Peroxiredoxin-1 OS=Homo sapiens GN=PRDX1 PE=1 SV=1                                         | 0.11 |
| >sp P06310 KV206_HUMAN Ig kappa chain V-II region RPMI 6410 OS=Homo sapiens PE=4 SV=1                             | 0.11 |
| >sp Q86UX7 URP2_HUMAN Fermitin family homolog 3 OS=Homo sapiens GN=FERMT3 PE=1 SV=1                               | 0.11 |
| >sp P08185 CBG_HUMAN Corticosteroid-binding globulin OS=Homo sapiens GN=SERPINA6 PE=1 SV=1                        | 0.11 |
| >sp P36980 FHR2_HUMAN Complement factor H-related protein 2 OS=Homo sapiens GN=CFHR2 PE=1 SV=1                    | 0.11 |
| >sp P05164 PERM_HUMAN Myeloperoxidase OS=Homo sapiens GN=MPO PE=1 SV=1                                            | 0.11 |
| >sp P14923 PLAK_HUMAN Junction plakoglobin OS=Homo sapiens GN=JUP PE=1 SV=3                                       | 0.11 |
| >sp P04899 GNAI2_HUMAN Guanine nucleotide-binding protein G(i) subunit alpha-2 OS=Homo sapiens GN=GNAI2 PE=1 SV=3 | 0.10 |
| >sp P26038 MOES_HUMAN Moesin OS=Homo sapiens GN=MSN PE=1 SV=3                                                     | 0.10 |
| >sp Q9NZT1 CALL5_HUMAN Calmodulin-like protein 5 OS=Homo sapiens GN=CALML5 PE=1 SV=2                              | 0.10 |
| >sp P03950 ANGI_HUMAN Angiogenin OS=Homo sapiens GN=ANG PE=1 SV=1                                                 | 0.10 |
| >sp P61626 LYSC_HUMAN Lysozyme C OS=Homo sapiens GN=LYZ PE=1 SV=1                                                 | 0.10 |
| >sp P02743 SAMP_HUMAN Serum amyloid P-component OS=Homo sapiens GN=APCS PE=1 SV=2                                 | 0.10 |
| >sp P02741 CRP_HUMAN C-reactive protein OS=Homo sapiens GN=CRP PE=1 SV=1                                          | 0.10 |
| >sp Q9Y490 TLN1_HUMAN Talin-1 OS=Homo sapiens GN=TLN1 PE=1 SV=3                                                   | 0.10 |
| >sp P14618-2 KPYM_HUMAN Isoform M1 of Pyruvate kinase isozymes M1/M2 OS=Homo sapiens GN=PKM2                      | 0.10 |
| >sp P15169 CBPN_HUMAN Carboxypeptidase N catalytic chain OS=Homo sapiens GN=CPN1 PE=1 SV=1                        | 0.09 |
| >sp Q16610 ECM1_HUMAN Extracellular matrix protein 1 OS=Homo sapiens GN=ECM1                                      | 0.09 |

|    |                                                                                      |      |
|----|--------------------------------------------------------------------------------------|------|
| 1  |                                                                                      |      |
| 2  |                                                                                      |      |
| 3  |                                                                                      |      |
| 4  | PE=1 SV=2                                                                            |      |
| 5  | >sp Q06033-2 ITI3_HUMAN Isoform 2 of Inter-alpha-trypsin inhibitor heavy chain H3    | 0.09 |
| 6  | OS=Homo sapiens GN=ITI3                                                              |      |
| 7  | >sp P02745 C1QA_HUMAN Complement C1q subcomponent subunit A OS=Homo sapiens          | 0.09 |
| 8  | GN=C1QA PE=1 SV=2                                                                    |      |
| 9  | >sp Q8IWL2 SFTA1_HUMAN Pulmonary surfactant-associated protein A1 OS=Homo            | 0.09 |
| 10 | sapiens GN=SFTA1 PE=1 SV=2                                                           |      |
| 11 | >sp P11226 MBL2_HUMAN Mannose-binding protein C OS=Homo sapiens GN=MBL2 PE=1         | 0.09 |
| 12 | SV=2                                                                                 |      |
| 13 | >sp P07355 ANXA2_HUMAN Annexin A2 OS=Homo sapiens GN=ANXA2 PE=1 SV=2                 | 0.09 |
| 14 | >sp P06733 ENO1_HUMAN Alpha-enolase OS=Homo sapiens GN=ENO1 PE=1 SV=2                | 0.08 |
| 15 | >sp Q15166 PON3_HUMAN Serum paraoxonase/lactonase 3 OS=Homo sapiens GN=PON3          | 0.08 |
| 16 | PE=1 SV=3                                                                            |      |
| 17 | >sp P04632 CPNS1_HUMAN Calpain small subunit 1 OS=Homo sapiens GN=CPNS1 PE=1         | 0.08 |
| 18 | SV=1                                                                                 |      |
| 19 | >sp P01344 IGF2_HUMAN Insulin-like growth factor II OS=Homo sapiens GN=IGF2 PE=1     | 0.08 |
| 20 | SV=1                                                                                 |      |
| 21 | >sp Q92954-3 PRG4_HUMAN Isoform C of Proteoglycan 4 OS=Homo sapiens GN=PRG4          | 0.08 |
| 22 | >sp P60953 CDC42_HUMAN Cell division control protein 42 homolog OS=Homo sapiens      | 0.08 |
| 23 | GN=CDC42 PE=1 SV=2                                                                   |      |
| 24 | >sp P15153 RAC2_HUMAN Ras-related C3 botulinum toxin substrate 2 OS=Homo sapiens     | 0.08 |
| 25 | GN=RAC2 PE=1 SV=1                                                                    |      |
| 26 | >sp P17936 IGFBP3_HUMAN Insulin-like growth factor-binding protein 3 OS=Homo sapiens | 0.07 |
| 27 | GN=IGFBP3 PE=1 SV=2                                                                  |      |
| 28 | >sp P00742 F10A_HUMAN Coagulation factor X OS=Homo sapiens GN=F10 PE=1 SV=2          | 0.07 |
| 29 | >sp P07384 CAN1_HUMAN Calpain-1 catalytic subunit OS=Homo sapiens GN=CAN1 PE=1       | 0.07 |
| 30 | SV=1                                                                                 |      |
| 31 | >sp P15924 DSP_HUMAN Desmoplakin OS=Homo sapiens GN=DSP PE=1 SV=3                    | 0.07 |
| 32 | >sp Q96FQ6 S100A16_HUMAN Protein S100-A16 OS=Homo sapiens GN=S100A16 PE=1 SV=1       | 0.07 |
| 33 | >sp P23490 LOR1_HUMAN Loricrin OS=Homo sapiens GN=LOR1 PE=1 SV=2                     | 0.07 |
| 34 | >sp P20340 RAB6A_HUMAN Ras-related protein Rab-6A OS=Homo sapiens GN=RAB6A           | 0.07 |
| 35 | PE=1 SV=3                                                                            |      |
| 36 | >sp Q96QR1 SG3A1_HUMAN Secretoglobin family 3A member 1 OS=Homo sapiens              | 0.07 |
| 37 | GN=SCGB3A1 PE=1 SV=2                                                                 |      |
| 38 | >sp Q9HCY8 S100A14_HUMAN Protein S100-A14 OS=Homo sapiens GN=S100A14 PE=1 SV=1       | 0.07 |
| 39 | >sp Q15485 FCN2_HUMAN Ficolin-2 OS=Homo sapiens GN=FCN2 PE=1 SV=2                    | 0.07 |
| 40 | >sp Q08554-2 DSC1_HUMAN Isoform 1B of Desmocollin-1 OS=Homo sapiens GN=DSC1          | 0.07 |
| 41 | >sp P10599 TXN_HUMAN Thioredoxin OS=Homo sapiens GN=TXN PE=1 SV=3                    | 0.07 |
| 42 | >sp Q15517 CDSN_HUMAN Corneodesmosin OS=Homo sapiens GN=CDSN PE=1 SV=3               | 0.07 |
| 43 | >sp P01717 LV403_HUMAN Ig lambda chain V-IV region H1 OS=Homo sapiens PE=1 SV=1      | 0.07 |
| 44 | >sp P62491 RAB11A_HUMAN Ras-related protein Rab-11A OS=Homo sapiens GN=RAB11A        | 0.07 |
| 45 | PE=1 SV=3                                                                            |      |
| 46 | >sp P04430 KV122_HUMAN Ig kappa chain V-I region BAN OS=Homo sapiens PE=1 SV=1       | 0.07 |
| 47 | >sp P01719 LV501_HUMAN Ig lambda chain V-V region DEL OS=Homo sapiens PE=1 SV=1      | 0.07 |
| 48 | >sp P01605 KV113_HUMAN Ig kappa chain V-I region Lay OS=Homo sapiens PE=1 SV=1       | 0.07 |
| 49 | >sp P01612 KV120_HUMAN Ig kappa chain V-I region Mev OS=Homo sapiens PE=1 SV=1       | 0.07 |
| 50 | >sp P04206 KV307_HUMAN Ig kappa chain V-III region GOL OS=Homo sapiens PE=1 SV=1     | 0.07 |
| 51 | >sp P01624 KV306_HUMAN Ig kappa chain V-III region POM OS=Homo sapiens PE=1 SV=1     | 0.07 |
| 52 | >sp P01833 PIGR_HUMAN Polymeric immunoglobulin receptor OS=Homo sapiens              | 0.07 |
| 53 | GN=PIGR PE=1 SV=4                                                                    |      |
| 54 | >sp Q5TA82 LCE2D_HUMAN Late cornified envelope protein 2D OS=Homo sapiens            | 0.07 |
| 55 | GN=LCE2D PE=2 SV=1                                                                   |      |
| 56 | >sp Q13093 PAFA_HUMAN Platelet-activating factor acetylhydrolase OS=Homo sapiens     | 0.07 |
| 57 | GN=PLA2G7 PE=1 SV=1                                                                  |      |
| 58 | >sp P01699 LV101_HUMAN Ig lambda chain V-I region VOR OS=Homo sapiens PE=1 SV=1      | 0.06 |
| 59 |                                                                                      |      |
| 60 |                                                                                      |      |

|                                                                                                                  |      |
|------------------------------------------------------------------------------------------------------------------|------|
| >sp P06318 LV604_HUMAN Ig lambda chain V-VI region WLT OS=Homo sapiens PE=1 SV=1                                 | 0.06 |
| >sp P01702 LV104_HUMAN Ig lambda chain V-I region NIG-64 OS=Homo sapiens PE=1 SV=1                               | 0.06 |
| >sp Q9BYJ0 FGFP2_HUMAN Fibroblast growth factor-binding protein 2 OS=Homo sapiens GN=FGFBP2 PE=1 SV=1            | 0.06 |
| >sp P00451 FA8_HUMAN Coagulation factor VIII OS=Homo sapiens GN=F8 PE=1 SV=1                                     | 0.06 |
| >sp P04209 LV211_HUMAN Ig lambda chain V-II region NIG-84 OS=Homo sapiens PE=1 SV=1                              | 0.06 |
| >sp Q13867 BLMH_HUMAN Bleomycin hydrolase OS=Homo sapiens GN=BLMH PE=1 SV=1                                      | 0.06 |
| >sp P21926 CD9_HUMAN CD9 antigen OS=Homo sapiens GN=CD9 PE=1 SV=4                                                | 0.06 |
| >sp P01614 KV201_HUMAN Ig kappa chain V-II region Cum OS=Homo sapiens PE=1 SV=1                                  | 0.06 |
| >sp Q08188 TGM3_HUMAN Protein-glutamine gamma-glutamyltransferase E OS=Homo sapiens GN=TGM3 PE=1 SV=4            | 0.06 |
| >sp P04434 KV310_HUMAN Ig kappa chain V-III region VH (Fragment) OS=Homo sapiens PE=4 SV=1                       | 0.06 |
| >sp P08567 PLEK_HUMAN Pleckstrin OS=Homo sapiens GN=PLEK PE=1 SV=3                                               | 0.06 |
| >sp P04211 LV001_HUMAN Ig lambda chain V region 4A OS=Homo sapiens PE=4 SV=1                                     | 0.06 |
| >sp Q8WUA8 TSK_HUMAN Tsukushin OS=Homo sapiens GN=TSKU PE=2 SV=3                                                 | 0.06 |
| >sp Q5T754 LCE1F_HUMAN Late cornified envelope protein 1F OS=Homo sapiens GN=LCE1F PE=2 SV=1                     | 0.06 |
| >sp Q5T7P3 LCE1B_HUMAN Late cornified envelope protein 1B OS=Homo sapiens GN=LCE1B PE=2 SV=1                     | 0.06 |
| >sp P01770 HV309_HUMAN Ig heavy chain V-III region NIE OS=Homo sapiens PE=1 SV=1                                 | 0.06 |
| >sp Q5D862 FILA2_HUMAN Filaggrin-2 OS=Homo sapiens GN=FLG2 PE=1 SV=1                                             | 0.06 |
| >sp P01771 HV310_HUMAN Ig heavy chain V-III region HIL OS=Homo sapiens PE=1 SV=1                                 | 0.06 |
| >sp Q9HB11 PARVB_HUMAN Beta-parvin OS=Homo sapiens GN=PARVB PE=1 SV=1                                            | 0.06 |
| >sp P14151 LYAM1_HUMAN L-selectin OS=Homo sapiens GN=SELL PE=1 SV=2                                              | 0.06 |
| >sp P00751-2 CFAB_HUMAN Isoform 2 of Complement factor B OS=Homo sapiens GN=CFB                                  | 0.06 |
| >sp P01814 HV201_HUMAN Ig heavy chain V-II region OU OS=Homo sapiens PE=1 SV=1                                   | 0.06 |
| >sp Q9UGM5 FETUB_HUMAN Fetuin-B OS=Homo sapiens GN=FETUB PE=1 SV=2                                               | 0.06 |
| >sp P18135 KV312_HUMAN Ig kappa chain V-III region HAH OS=Homo sapiens PE=2 SV=1                                 | 0.06 |
| >sp Q04756 HGFA_HUMAN Hepatocyte growth factor activator OS=Homo sapiens GN=HGFA PE=1 SV=1                       | 0.06 |
| >sp P29972 AQP1_HUMAN Aquaporin-1 OS=Homo sapiens GN=AQP1 PE=1 SV=3                                              | 0.05 |
| >sp Q01469 FABP5_HUMAN Fatty acid-binding protein, epidermal OS=Homo sapiens GN=FABP5 PE=1 SV=3                  | 0.05 |
| >sp Q9H8L6 MMRN2_HUMAN Multimerin-2 OS=Homo sapiens GN=MMRN2 PE=1 SV=2                                           | 0.05 |
| >sp P47929 LEG7_HUMAN Galectin-7 OS=Homo sapiens GN=LGALS7 PE=1 SV=2                                             | 0.05 |
| >sp O75636-2 FCN3_HUMAN Isoform 2 of Ficolin-3 OS=Homo sapiens GN=FCN3                                           | 0.05 |
| >sp P27105 STOM_HUMAN Erythrocyte band 7 integral membrane protein OS=Homo sapiens GN=STOM PE=1 SV=3             | 0.05 |
| >sp P02671 FIBA_HUMAN Fibrinogen alpha chain OS=Homo sapiens GN=FGA PE=1 SV=2                                    | 0.05 |
| >sp P08603-2 CFAH_HUMAN Isoform 2 of Complement factor H OS=Homo sapiens GN=CFH                                  | 0.05 |
| >sp P04070 PROC_HUMAN Vitamin K-dependent protein C OS=Homo sapiens GN=PROC PE=1 SV=1                            | 0.05 |
| >sp Q9H4G4 GAPR1_HUMAN Golgi-associated plant pathogenesis-related protein 1 OS=Homo sapiens GN=GLIPR2 PE=1 SV=3 | 0.05 |
| >sp P05556-2 ITB1_HUMAN Isoform Beta-1B of Integrin beta-1 OS=Homo sapiens GN=ITGB1                              | 0.05 |
| >sp O75882 ATRN_HUMAN Attractin OS=Homo sapiens GN=ATRN PE=1 SV=2                                                | 0.05 |
| >sp P22735 TGM1_HUMAN Protein-glutamine gamma-glutamyltransferase K OS=Homo sapiens GN=TGM1 PE=1 SV=4            | 0.04 |
| >sp P00338 LDHA_HUMAN L-lactate dehydrogenase A chain OS=Homo sapiens GN=LDHA                                    | 0.04 |



|    |                                                                                                                                |      |
|----|--------------------------------------------------------------------------------------------------------------------------------|------|
| 1  |                                                                                                                                |      |
| 2  |                                                                                                                                |      |
| 3  |                                                                                                                                |      |
| 4  | PE=1 SV=2                                                                                                                      |      |
| 5  | >sp P62873 GBB1_HUMAN Guanine nucleotide-binding protein G(I)/G(S)/G(T) subunit beta-1 OS=Homo sapiens GN=GNB1 PE=1 SV=3       | 0.04 |
| 6  | >sp Q9BUN1 CA056_HUMAN Uncharacterized protein C1orf56 OS=Homo sapiens GN=C1orf56 PE=1 SV=1                                    | 0.04 |
| 7  | >sp P01130 LDLR_HUMAN Low-density lipoprotein receptor OS=Homo sapiens GN=LDLR PE=1 SV=1                                       | 0.04 |
| 8  | >sp Q8TDB8 GTR14_HUMAN Solute carrier family 2, facilitated glucose transporter member 14 OS=Homo sapiens GN=SLC2A14 PE=2 SV=1 | 0.04 |
| 9  | >sp P55103 INHBC_HUMAN Inhibin beta C chain OS=Homo sapiens GN=INHBC PE=1 SV=1                                                 | 0.04 |
| 10 | >sp Q8TAQ9 SUN3_HUMAN SUN domain-containing protein 3 OS=Homo sapiens GN=SUN3 PE=2 SV=4                                        | 0.04 |
| 11 | >sp P23229-2 ITA6_HUMAN Isoform Alpha-6X1A of Integrin alpha-6 OS=Homo sapiens GN=ITGA6                                        | 0.04 |
| 12 | >sp Q9BZA4 CY15B_HUMAN Putative gamma-taxilin-like protein CYorf15B OS=Homo sapiens GN=CYorf15B PE=5 SV=1                      | 0.04 |
| 13 | >sp Q6ZN30 BNC2_HUMAN Zinc finger protein basonuclin-2 OS=Homo sapiens GN=BNC2 PE=2 SV=1                                       | 0.04 |
| 14 | >sp O75223 GGCT_HUMAN Gamma-glutamylcyclotransferase OS=Homo sapiens GN=GGCT PE=1 SV=1                                         | 0.04 |
| 15 | >sp P68032 ACTC_HUMAN Actin, alpha cardiac muscle 1 OS=Homo sapiens GN=ACTC1 PE=1 SV=1                                         | 0.04 |
| 16 | >Reverse >sp Q9NU02 ANKR5_HUMAN Ankyrin repeat domain-containing protein 5 OS=Homo sapiens GN=ANKRD5 PE=2 SV=2                 | 0.04 |
| 17 | >sp Q7L273 KCTD9_HUMAN BTB/POZ domain-containing protein KCTD9 OS=Homo sapiens GN=KCTD9 PE=2 SV=1                              | 0.04 |
| 18 | >sp A6NN79 PERPL_HUMAN Putative PERP-like protein OS=Homo sapiens PE=2 SV=3                                                    | 0.04 |
| 19 | >sp Q07954 LRP1_HUMAN Prolow-density lipoprotein receptor-related protein 1 OS=Homo sapiens GN=LRP1 PE=1 SV=2                  | 0.04 |
| 20 | >sp P37802 TAGL2_HUMAN Transgelin-2 OS=Homo sapiens GN=TAGLN2 PE=1 SV=3                                                        | 0.04 |
| 21 | >sp P04792 HSPB1_HUMAN Heat shock protein beta-1 OS=Homo sapiens GN=HSPB1 PE=1 SV=2                                            | 0.04 |
| 22 | >sp P07339 CATD_HUMAN Cathepsin D OS=Homo sapiens GN=CTSD PE=1 SV=1                                                            | 0.03 |
| 23 | >sp P13224 GP1BB_HUMAN Platelet glycoprotein Ib beta chain OS=Homo sapiens GN=GP1BB PE=1 SV=1                                  | 0.03 |
| 24 | >sp CAS1_BOVIN (Common contaminant protein)                                                                                    | 0.03 |
| 25 | >sp K22E_HUMAN (Common contaminant protein)                                                                                    | 0.03 |
| 26 | >sp P11021 GRP78_HUMAN 78 kDa glucose-regulated protein OS=Homo sapiens GN=HSPA5 PE=1 SV=2                                     | 0.03 |
| 27 | >sp P51159 RB27A_HUMAN Ras-related protein Rab-27A OS=Homo sapiens GN=RAB27A PE=1 SV=3                                         | 0.03 |
| 28 | >Reverse >sp P04350 TBB4A_HUMAN Tubulin beta-4A chain OS=Homo sapiens GN=TUBB4A PE=1 SV=2                                      | 0.03 |
| 29 | >sp P30041 PRDX6_HUMAN Peroxiredoxin-6 OS=Homo sapiens GN=PRDX6 PE=1 SV=3                                                      | 0.03 |
| 30 | >sp P49411 EFTU_HUMAN Elongation factor Tu, mitochondrial OS=Homo sapiens GN=TUFM PE=1 SV=2                                    | 0.03 |
| 31 | >sp P02679 FIBG_HUMAN Fibrinogen gamma chain OS=Homo sapiens GN=FGG PE=1 SV=3                                                  | 0.03 |
| 32 | >sp Q8NBP7 PCSK9_HUMAN Proprotein convertase subtilisin/kexin type 9 OS=Homo sapiens GN=PCSK9 PE=1 SV=3                        | 0.03 |
| 33 | >sp Q9Y496 KIF3A_HUMAN Kinesin-like protein KIF3A OS=Homo sapiens GN=KIF3A PE=1 SV=4                                           | 0.03 |
| 34 | >sp P01871-2 IGHM_HUMAN Isoform 2 of Ig mu chain C region OS=Homo sapiens GN=IGHM                                              | 0.03 |
| 35 | >sp P26927 HGFL_HUMAN Hepatocyte growth factor-like protein OS=Homo sapiens                                                    | 0.03 |
| 36 |                                                                                                                                |      |
| 37 |                                                                                                                                |      |
| 38 |                                                                                                                                |      |
| 39 |                                                                                                                                |      |
| 40 |                                                                                                                                |      |
| 41 |                                                                                                                                |      |
| 42 |                                                                                                                                |      |
| 43 |                                                                                                                                |      |
| 44 |                                                                                                                                |      |
| 45 |                                                                                                                                |      |
| 46 |                                                                                                                                |      |
| 47 |                                                                                                                                |      |
| 48 |                                                                                                                                |      |
| 49 |                                                                                                                                |      |
| 50 |                                                                                                                                |      |
| 51 |                                                                                                                                |      |
| 52 |                                                                                                                                |      |
| 53 |                                                                                                                                |      |
| 54 |                                                                                                                                |      |
| 55 |                                                                                                                                |      |
| 56 |                                                                                                                                |      |
| 57 |                                                                                                                                |      |
| 58 |                                                                                                                                |      |
| 59 |                                                                                                                                |      |
| 60 |                                                                                                                                |      |

|    |                                                                                                                       |      |
|----|-----------------------------------------------------------------------------------------------------------------------|------|
| 1  |                                                                                                                       |      |
| 2  |                                                                                                                       |      |
| 3  |                                                                                                                       |      |
| 4  | <b>GN=MST1 PE=1 SV=2</b>                                                                                              |      |
| 5  | >sp P58335 ANTR2_HUMAN Anthrax toxin receptor 2 OS=Homo sapiens GN=ANTXR2 PE=1 SV=5                                   | 0.03 |
| 6  | >sp Q12805 FBLN3_HUMAN EGF-containing fibulin-like extracellular matrix protein 1 OS=Homo sapiens GN=EFEMP1 PE=1 SV=2 | 0.03 |
| 7  | >sp P13984 T2FB_HUMAN General transcription factor IIF subunit 2 OS=Homo sapiens GN=GTF2F2 PE=1 SV=2                  | 0.03 |
| 8  | >sp P49747 COMP_HUMAN Cartilage oligomeric matrix protein OS=Homo sapiens GN=COMP PE=1 SV=2                           | 0.03 |
| 9  | >sp Q8TCZ2 C99L2_HUMAN CD99 antigen-like protein 2 OS=Homo sapiens GN=CD99L2 PE=2 SV=1                                | 0.03 |
| 10 | >sp Q9NPQ8 RIC8A_HUMAN Synembryn-A OS=Homo sapiens GN=RIC8A PE=1 SV=3                                                 | 0.03 |
| 11 | >sp P12931 SRC_HUMAN Proto-oncogene tyrosine-protein kinase Src OS=Homo sapiens GN=SRC PE=1 SV=3                      | 0.03 |
| 12 | >sp P43251 BTD_HUMAN Biotinidase OS=Homo sapiens GN=BTD PE=1 SV=2                                                     | 0.03 |
| 13 | >sp Q6ZVX7 NCRP1_HUMAN Non-specific cytotoxic cell receptor protein 1 homolog OS=Homo sapiens GN=NCCRP1 PE=1 SV=1     | 0.03 |
| 14 | >sp Q15404 RSU1_HUMAN Ras suppressor protein 1 OS=Homo sapiens GN=RSU1 PE=1 SV=3                                      | 0.03 |
| 15 | >sp Q9UPY8 MARE3_HUMAN Microtubule-associated protein RP/EB family member 3 OS=Homo sapiens GN=MAPRE3 PE=1 SV=1       | 0.03 |
| 16 | >sp P48023 TNFL6_HUMAN Tumor necrosis factor ligand superfamily member 6 OS=Homo sapiens GN=FASLG PE=1 SV=1           | 0.03 |
| 17 | >sp P09493 TPM1_HUMAN Tropomyosin alpha-1 chain OS=Homo sapiens GN=TPM1 PE=1 SV=2                                     | 0.03 |
| 18 | >sp O00560 SDCB1_HUMAN Syntenin-1 OS=Homo sapiens GN=SDCBP PE=1 SV=1                                                  | 0.02 |
| 19 | >Reverse >sp Q8NGI6 OR4DA_HUMAN Olfactory receptor 4D10 OS=Homo sapiens GN=OR4D10 PE=2 SV=1                           | 0.02 |
| 20 | >Reverse >sp P51665 PSD7_HUMAN 26S proteasome non-ATPase regulatory subunit 7 OS=Homo sapiens GN=PSMD7 PE=1 SV=2      | 0.02 |
| 21 | >sp P05160 F13B_HUMAN Coagulation factor XIII B chain OS=Homo sapiens GN=F13B PE=1 SV=3                               | 0.02 |
| 22 | >sp Q15582 BGH3_HUMAN Transforming growth factor-beta-induced protein ig-h3 OS=Homo sapiens GN=TGFB1 PE=1 SV=1        | 0.02 |
| 23 | >sp P48740 MASP1_HUMAN Mannan-binding lectin serine protease 1 OS=Homo sapiens GN=MASP1 PE=1 SV=3                     | 0.02 |
| 24 | >sp P23142-3 FBLN1_HUMAN Isoform B of Fibulin-1 OS=Homo sapiens GN=FBLN1                                              | 0.02 |
| 25 | >sp P04275 VWF_HUMAN von Willebrand factor OS=Homo sapiens GN=VWF PE=1 SV=4                                           | 0.02 |
| 26 | >sp Q12931 TRAP1_HUMAN Heat shock protein 75 kDa, mitochondrial OS=Homo sapiens GN=TRAP1 PE=1 SV=3                    | 0.02 |
| 27 | >sp P02774-2 VTDB_HUMAN Isoform 2 of Vitamin D-binding protein OS=Homo sapiens GN=GC                                  | 0.02 |
| 28 | >sp Q12907 LMAN2_HUMAN Vesicular integral-membrane protein VIP36 OS=Homo sapiens GN=LMAN2 PE=1 SV=1                   | 0.02 |
| 29 | >sp Q86YZ3 HORN_HUMAN Hornerin OS=Homo sapiens GN=HRNR PE=1 SV=2                                                      | 0.02 |
| 30 | >Reverse >sp Q6PF15 KLH35_HUMAN Kelch-like protein 35 OS=Homo sapiens GN=KLHL35 PE=2 SV=2                             | 0.02 |
| 31 | >sp P06396-2 GELS_HUMAN Isoform 2 of Gelsolin OS=Homo sapiens GN=GSN                                                  | 0.02 |
| 32 | >sp P07900 HS90A_HUMAN Heat shock protein HSP 90-alpha OS=Homo sapiens GN=HSP90AA1 PE=1 SV=5                          | 0.02 |
| 33 | >sp P04222 1C03_HUMAN HLA class I histocompatibility antigen, Cw-3 alpha chain OS=Homo sapiens GN=HLA-C PE=1 SV=2     | 0.02 |
| 34 | >sp P33151 CADH5_HUMAN Cadherin-5 OS=Homo sapiens GN=CDH5 PE=1 SV=5                                                   | 0.02 |
| 35 | >sp P18564 ITB6_HUMAN Integrin beta-6 OS=Homo sapiens GN=ITGB6 PE=1 SV=2                                              | 0.02 |
| 36 | >sp K1M2_SHEEP (Common contaminant protein)                                                                           | 0.02 |
| 37 |                                                                                                                       |      |
| 38 |                                                                                                                       |      |
| 39 |                                                                                                                       |      |
| 40 |                                                                                                                       |      |
| 41 |                                                                                                                       |      |
| 42 |                                                                                                                       |      |
| 43 |                                                                                                                       |      |
| 44 |                                                                                                                       |      |
| 45 |                                                                                                                       |      |
| 46 |                                                                                                                       |      |
| 47 |                                                                                                                       |      |
| 48 |                                                                                                                       |      |
| 49 |                                                                                                                       |      |
| 50 |                                                                                                                       |      |
| 51 |                                                                                                                       |      |
| 52 |                                                                                                                       |      |
| 53 |                                                                                                                       |      |
| 54 |                                                                                                                       |      |
| 55 |                                                                                                                       |      |
| 56 |                                                                                                                       |      |
| 57 |                                                                                                                       |      |
| 58 |                                                                                                                       |      |
| 59 |                                                                                                                       |      |
| 60 |                                                                                                                       |      |

|    |                                                                                         |      |
|----|-----------------------------------------------------------------------------------------|------|
| 1  |                                                                                         |      |
| 2  |                                                                                         |      |
| 3  | >sp P05154 IPSP_HUMAN Plasma serine protease inhibitor OS=Homo sapiens                  | 0.02 |
| 4  | GN=SERPINA5 PE=1 SV=3                                                                   |      |
| 5  | >Reverse >sp Q12770 SCAP_HUMAN Sterol regulatory element-binding protein cleavage-      | 0.02 |
| 6  | activating protein OS=Homo sapiens GN=SCAP PE=1 SV=4                                    |      |
| 7  | >sp P01880-2 IGHD_HUMAN Isoform 2 of Ig delta chain C region OS=Homo sapiens            | 0.02 |
| 8  | GN=IGHD                                                                                 |      |
| 9  | >Reverse >sp Q15118 PDK1_HUMAN [Pyruvate dehydrogenase [lipoamide]] kinase              | 0.02 |
| 10 | isozyme 1, mitochondrial OS=Homo sapiens GN=PDK1 PE=1 SV=1                              |      |
| 11 | >sp Q8TDD1 DDX54_HUMAN ATP-dependent RNA helicase DDX54 OS=Homo sapiens                 | 0.02 |
| 12 | GN=DDX54 PE=1 SV=2                                                                      |      |
| 13 | >sp P12814 ACTN1_HUMAN Alpha-actinin-1 OS=Homo sapiens GN=ACTN1 PE=1 SV=2               | 0.02 |
| 14 | >sp P68363 TUBA1B_HUMAN Tubulin alpha-1B chain OS=Homo sapiens GN=TUBA1B PE=1           | 0.02 |
| 15 | SV=1                                                                                    |      |
| 16 | >sp P68104 EF1A1_HUMAN Elongation factor 1-alpha 1 OS=Homo sapiens GN=EEF1A1            | 0.02 |
| 17 | PE=1 SV=1                                                                               |      |
| 18 | >sp Q01518-2 CAP1_HUMAN Isoform 2 of Adenylyl cyclase-associated protein 1 OS=Homo      | 0.02 |
| 19 | sapiens GN=CAP1                                                                         |      |
| 20 | >sp Q13608 PEX6_HUMAN Peroxisome assembly factor 2 OS=Homo sapiens GN=PEX6              | 0.01 |
| 21 | PE=1 SV=2                                                                               |      |
| 22 | >sp P11166 GTR1_HUMAN Solute carrier family 2, facilitated glucose transporter member 1 | 0.01 |
| 23 | OS=Homo sapiens GN=SLC2A1 PE=1 SV=2                                                     |      |
| 24 | >sp P20742 PZP_HUMAN Pregnancy zone protein OS=Homo sapiens GN=PZP PE=1 SV=4            | 0.01 |
| 25 | >sp P08514-2 ITA2B_HUMAN Isoform 2 of Integrin alpha-IIb OS=Homo sapiens GN=ITGA2B      | 0.01 |
| 26 | >Reverse >sp P41162 ETV3_HUMAN ETS translocation variant 3 OS=Homo sapiens              | 0.01 |
| 27 | GN=ETV3 PE=1 SV=2                                                                       |      |
| 28 | >Reverse >sp Q9NVN3 RIC8B_HUMAN Synembryn-B OS=Homo sapiens GN=RIC8B PE=1               | 0.01 |
| 29 | SV=2                                                                                    |      |
| 30 | >Reverse >sp Q7Z745 HTRB2_HUMAN HEAT repeat-containing protein 7B2 OS=Homo              | 0.01 |
| 31 | sapiens GN=HEATR7B2 PE=2 SV=3                                                           |      |
| 32 | >sp Q9HB96 FANCE_HUMAN Fanconi anemia group E protein OS=Homo sapiens                   | 0.01 |
| 33 | GN=FANCE PE=1 SV=1                                                                      |      |
| 34 | >sp Q95741 CPNE6_HUMAN Copine-6 OS=Homo sapiens GN=CPNE6 PE=1 SV=3                      | 0.01 |
| 35 | >sp P18206 VINC_HUMAN Vinculin OS=Homo sapiens GN=VCL PE=1 SV=4                         | 0.01 |
| 36 | >sp Q8TF66 LRC15_HUMAN Leucine-rich repeat-containing protein 15 OS=Homo sapiens        | 0.01 |
| 37 | GN=LRR15 PE=1 SV=2                                                                      |      |
| 38 | >Reverse >sp Q4G0J3 LARP7_HUMAN La-related protein 7 OS=Homo sapiens GN=LARP7           | 0.01 |
| 39 | PE=1 SV=1                                                                               |      |
| 40 | >Reverse >sp P29353 SHC1_HUMAN SHC-transforming protein 1 OS=Homo sapiens               | 0.01 |
| 41 | GN=SHC1 PE=1 SV=4                                                                       |      |
| 42 | >sp Q08380 LG3BP_HUMAN Galectin-3-binding protein OS=Homo sapiens GN=LGALS3BP           | 0.01 |
| 43 | PE=1 SV=1                                                                               |      |
| 44 | >sp P28799 GRN_HUMAN Granulins OS=Homo sapiens GN=GRN PE=1 SV=2                         | 0.01 |
| 45 | >sp P02751-7 FINC_HUMAN Isoform 7 of Fibronectin OS=Homo sapiens GN=FN1                 | 0.01 |
| 46 | >sp K1C9_HUMAN (Common contaminant protein)                                             | 0.01 |
| 47 | >sp P13796 PLSL_HUMAN Plastin-2 OS=Homo sapiens GN=LCP1 PE=1 SV=6                       | 0.01 |
| 48 | >sp Q96PD5-2 PGRP2_HUMAN Isoform 2 of N-acetylmuramoyl-L-alanine amidase                | 0.01 |
| 49 | OS=Homo sapiens GN=PGLYRP2                                                              |      |
| 50 | >sp Q96MY7 F161B_HUMAN Protein FAM161B OS=Homo sapiens GN=FAM161B PE=2                  | 0.01 |
| 51 | SV=2                                                                                    |      |
| 52 | >sp P05164-2 PERM_HUMAN Isoform H14 of Myeloperoxidase OS=Homo sapiens GN=MPO           | 0.01 |
| 53 | >sp P35579 MYH9_HUMAN Myosin-9 OS=Homo sapiens GN=MYH9 PE=1 SV=4                        | 0.01 |
| 54 | >Reverse >sp Q6ZS81-2 WDFY4_HUMAN Isoform 2 of WD repeat- and FYVE domain-              | 0.01 |
| 55 | containing protein 4 OS=Homo sapiens GN=WDFY4                                           |      |
| 56 | >sp O00187 MASP2_HUMAN Mannan-binding lectin serine protease 2 OS=Homo sapiens          | 0.01 |
| 57 | GN=MASP2 PE=1 SV=4                                                                      |      |
| 58 |                                                                                         |      |
| 59 |                                                                                         |      |
| 60 |                                                                                         |      |

|                                                                                                                                 |      |
|---------------------------------------------------------------------------------------------------------------------------------|------|
| >sp P02788 TRFL_HUMAN Lactotransferrin OS=Homo sapiens GN=LTF PE=1 SV=6                                                         | 0.01 |
| >sp Q2TV78 MSTP9_HUMAN Putative macrophage-stimulating protein MSTP9 OS=Homo sapiens GN=MST1P9 PE=5 SV=2                        | 0.01 |
| >sp Q8WXW3 PIBF1_HUMAN Progesterone-induced-blocking factor 1 OS=Homo sapiens GN=PIBF1 PE=2 SV=2                                | 0.01 |
| >sp P35222 CTNB1_HUMAN Catenin beta-1 OS=Homo sapiens GN=CTNNB1 PE=1 SV=1                                                       | 0.01 |
| >sp Q96KG9 NTKL_HUMAN N-terminal kinase-like protein OS=Homo sapiens GN=SCYL1 PE=1 SV=1                                         | 0.01 |
| >sp Q8NDH2 CC168_HUMAN Coiled-coil domain-containing protein 168 OS=Homo sapiens GN=CCDC168 PE=2 SV=2                           | 0.01 |
| >Reverse >sp Q9Y4F3 LKAP_HUMAN Limkain-b1 OS=Homo sapiens GN=LKAP PE=1 SV=5                                                     | 0.01 |
| >sp P21333 FLNA_HUMAN Filamin-A OS=Homo sapiens GN=FLNA PE=1 SV=4                                                               | 0.01 |
| >Reverse >sp Q9UGU0 TCF20_HUMAN Transcription factor 20 OS=Homo sapiens GN=TCF20 PE=1 SV=3                                      | 0.01 |
| >Reverse >sp Q92817 EVPL_HUMAN Envoplakin OS=Homo sapiens GN=EVPL PE=1 SV=3                                                     | 0.01 |
| >Reverse >sp O60566 BUB1B_HUMAN Mitotic checkpoint serine/threonine-protein kinase BUB1 beta OS=Homo sapiens GN=BUB1B PE=1 SV=3 | 0.01 |
| >sp P12111 CO6A3_HUMAN Collagen alpha-3(VI) chain OS=Homo sapiens GN=COL6A3 PE=1 SV=5                                           | 0.01 |
| >sp P15924-2 DESP_HUMAN Isoform DII of Desmoplakin OS=Homo sapiens GN=DSP                                                       | 0.01 |
| >sp Q86SQ4 GP126_HUMAN G-protein coupled receptor 126 OS=Homo sapiens GN=GPR126 PE=1 SV=3                                       | 0.01 |
| >sp Q13201 MMRN1_HUMAN Multimerin-1 OS=Homo sapiens GN=MMRN1 PE=1 SV=3                                                          | 0.01 |
| >sp P11532 DMD_HUMAN Dystrophin OS=Homo sapiens GN=DMD PE=1 SV=3                                                                | 0.01 |
| >Reverse >sp Q96C45 ULK4_HUMAN Serine/threonine-protein kinase ULK4 OS=Homo sapiens GN=ULK4 PE=2 SV=2                           | 0.01 |
| >sp Q8TD26 CHD6_HUMAN Chromodomain-helicase-DNA-binding protein 6 OS=Homo sapiens GN=CHD6 PE=1 SV=4                             | 0.01 |

**Sample 2**

| Description                                                                          | Np<br>Sp<br>C |
|--------------------------------------------------------------------------------------|---------------|
| >sp P02647 APOA1_HUMAN Apolipoprotein A-I OS=Homo sapiens GN=APOA1 PE=1 SV=1         | 6.15          |
| >sp P02649 APOE_HUMAN Apolipoprotein E OS=Homo sapiens GN=APOE PE=1 SV=1             | 4.39          |
| >sp P02768 ALBU_HUMAN Serum albumin OS=Homo sapiens GN=ALB PE=1 SV=2                 | 3.86          |
| >sp P0CG05 LAC2_HUMAN Ig lambda-2 chain C regions OS=Homo sapiens GN=IGLC2 PE=1 SV=1 | 3.65          |
| >sp P02654 APOC1_HUMAN Apolipoprotein C-I OS=Homo sapiens GN=APOC1 PE=1 SV=1         | 2.02          |
| >sp P55056 APOC4_HUMAN Apolipoprotein C-IV OS=Homo sapiens GN=APOC4 PE=1 SV=1        | 2.01          |
| >sp P01834 IGKC_HUMAN Ig kappa chain C region OS=Homo sapiens GN=IGKC PE=1 SV=1      | 2.00          |
| >sp P02652 APOA2_HUMAN Apolipoprotein A-II OS=Homo sapiens GN=APOA2 PE=1 SV=1        | 1.82          |
| >sp P04114 APOB_HUMAN Apolipoprotein B-100 OS=Homo sapiens GN=APOB PE=1 SV=2         | 1.74          |
| >sp P01024 CO3_HUMAN Complement C3 OS=Homo sapiens GN=C3 PE=1 SV=2                   | 1.54          |
| >sp P35542 SAA4_HUMAN Serum amyloid A-4 protein OS=Homo sapiens GN=SAA4 PE=1 SV=2    | 1.40          |
| >sp P01876 IGHA1_HUMAN Ig alpha-1 chain C region OS=Homo sapiens GN=IGHA1 PE=1 SV=2  | 1.28          |
| >sp P02656 APOC3_HUMAN Apolipoprotein C-III OS=Homo sapiens GN=APOC3 PE=1 SV=1       | 1.25          |
| >sp P02655 APOC2_HUMAN Apolipoprotein C-II OS=Homo sapiens GN=APOC2 PE=1 SV=1        | 1.23          |
| >sp P00738 HPT_HUMAN Haptoglobin OS=Homo sapiens GN=HP PE=1 SV=1                     | 1.13          |
| >sp K22E_HUMAN (Common contaminant protein)                                          | 1.12          |

|                                                                                                  |      |
|--------------------------------------------------------------------------------------------------|------|
| >sp TRFE_HUMAN (Common contaminant protein)                                                      | 1.04 |
| >sp P01871 IGHM_HUMAN Ig mu chain C region OS=Homo sapiens GN=IGHM PE=1 SV=3                     | 1.02 |
| >sp P01009 A1AT_HUMAN Alpha-1-antitrypsin OS=Homo sapiens GN=SERPINA1 PE=1 SV=3                  | 0.98 |
| >sp P06727 APOA4_HUMAN Apolipoprotein A-IV OS=Homo sapiens GN=APOA4 PE=1 SV=3                    | 0.98 |
| >sp P04004 VTNC_HUMAN Vitronectin OS=Homo sapiens GN=VTN PE=1 SV=1                               | 0.89 |
| >sp P02735 SAA_HUMAN Serum amyloid A protein OS=Homo sapiens GN=SAA1 PE=1 SV=2                   | 0.78 |
| >sp P49913 CAMP_HUMAN Cathelicidin antimicrobial peptide OS=Homo sapiens GN=CAMP PE=1 SV=1       | 0.77 |
| >sp P05090 APOD_HUMAN Apolipoprotein D OS=Homo sapiens GN=APOD PE=1 SV=1                         | 0.77 |
| >sp P10909 CLUS_HUMAN Clusterin OS=Homo sapiens GN=CLU PE=1 SV=1                                 | 0.76 |
| >sp P01620 KV302_HUMAN Ig kappa chain V-III region SIE OS=Homo sapiens PE=1 SV=1                 | 0.74 |
| >sp O14791 APOL1_HUMAN Apolipoprotein L1 OS=Homo sapiens GN=APOL1 PE=1 SV=5                      | 0.73 |
| >sp P02749 APOH_HUMAN Beta-2-glycoprotein 1 OS=Homo sapiens GN=APOH PE=1 SV=3                    | 0.72 |
| >sp P68871 HBB_HUMAN Hemoglobin subunit beta OS=Homo sapiens GN=HBB PE=1 SV=2                    | 0.69 |
| >sp P02774 VTDB_HUMAN Vitamin D-binding protein OS=Homo sapiens GN=GC PE=1 SV=1                  | 0.65 |
| >sp P04003 C4BPA_HUMAN C4b-binding protein alpha chain OS=Homo sapiens GN=C4BPA PE=1 SV=2        | 0.62 |
| >sp P0C0L5 CO4B_HUMAN Complement C4-B OS=Homo sapiens GN=C4B PE=1 SV=1                           | 0.62 |
| >sp P27169 PON1_HUMAN Serum paraoxonase/arylesterase 1 OS=Homo sapiens GN=PON1 PE=1 SV=3         | 0.62 |
| >sp P00734 THRB_HUMAN Prothrombin OS=Homo sapiens GN=F2 PE=1 SV=2                                | 0.60 |
| >sp P01591 IGJ_HUMAN Immunoglobulin J chain OS=Homo sapiens GN=IGJ PE=1 SV=4                     | 0.60 |
| >sp P02766 TTHY_HUMAN Transthyretin OS=Homo sapiens GN=TTR PE=1 SV=1                             | 0.60 |
| >sp O95445 APOM_HUMAN Apolipoprotein M OS=Homo sapiens GN=APOM PE=1 SV=2                         | 0.58 |
| >sp P01861 IGHG4_HUMAN Ig gamma-4 chain C region OS=Homo sapiens GN=IGHG4 PE=1 SV=1              | 0.58 |
| >sp P02790 HEMO_HUMAN Hemopexin OS=Homo sapiens GN=HPX PE=1 SV=2                                 | 0.57 |
| >sp P02760 AMBP_HUMAN Protein AMBP OS=Homo sapiens GN=AMBP PE=1 SV=1                             | 0.56 |
| >sp P01023 A2MG_HUMAN Alpha-2-macroglobulin OS=Homo sapiens GN=A2M PE=1 SV=3                     | 0.56 |
| >sp P01042 KNG1_HUMAN Kininogen-1 OS=Homo sapiens GN=KNG1 PE=1 SV=2                              | 0.52 |
| >sp P01781 HV320_HUMAN Ig heavy chain V-III region GAL OS=Homo sapiens PE=1 SV=1                 | 0.50 |
| >sp P01008 ANT3_HUMAN Antithrombin-III OS=Homo sapiens GN=SERPINC1 PE=1 SV=1                     | 0.49 |
| >sp Q8TDL5 BPIB1_HUMAN BPI fold-containing family B member 1 OS=Homo sapiens GN=BPIFB1 PE=2 SV=1 | 0.45 |
| >sp P01859 IGHG2_HUMAN Ig gamma-2 chain C region OS=Homo sapiens GN=IGHG2 PE=1 SV=2              | 0.45 |
| >sp P04433 KV309_HUMAN Ig kappa chain V-III region VG (Fragment) OS=Homo sapiens PE=1 SV=1       | 0.44 |
| >sp P01779 HV318_HUMAN Ig heavy chain V-III region TUR OS=Homo sapiens PE=1 SV=1                 | 0.44 |
| >sp P19652 A1AG2_HUMAN Alpha-1-acid glycoprotein 2 OS=Homo sapiens GN=ORM2 PE=1 SV=2             | 0.44 |
| >sp P02765 FETUA_HUMAN Alpha-2-HS-glycoprotein OS=Homo sapiens GN=AHSG PE=1 SV=1                 | 0.42 |
| >sp P01610 KV118_HUMAN Ig kappa chain V-I region WEA OS=Homo sapiens PE=1 SV=1                   | 0.41 |
| >sp P04196 HRG_HUMAN Histidine-rich glycoprotein OS=Homo sapiens GN=HRG PE=1 SV=1                | 0.40 |
| >sp P02753 RET4_HUMAN Retinol-binding protein 4 OS=Homo sapiens GN=RBP4 PE=1 SV=3                | 0.40 |
| >sp P06396-2 GELS_HUMAN Isoform 2 of Gelsolin OS=Homo sapiens GN=GSN                             | 0.39 |
| >sp P02768-2 ALBU_HUMAN Isoform 2 of Serum albumin OS=Homo sapiens GN=ALB                        | 0.38 |

|                                                                                                        |      |
|--------------------------------------------------------------------------------------------------------|------|
| >sp P01011 AACT_HUMAN Alpha-1-antichymotrypsin OS=Homo sapiens GN=SERPINA3 PE=1 SV=2                   | 0.38 |
| >sp TRYP_PIG (Common contaminant protein)                                                              | 0.38 |
| >sp Q6Q788 APOA5_HUMAN Apolipoprotein A-V OS=Homo sapiens GN=APOA5 PE=1 SV=1                           | 0.38 |
| >sp P00747 PLMN_HUMAN Plasminogen OS=Homo sapiens GN=PLG PE=1 SV=2                                     | 0.38 |
| >sp P01857 IGHG1_HUMAN Ig gamma-1 chain C region OS=Homo sapiens GN=IGHG1 PE=1 SV=1                    | 0.38 |
| >sp P08603 CFAH_HUMAN Complement factor H OS=Homo sapiens GN=CFH PE=1 SV=4                             | 0.37 |
| >sp Q9BXR6 FHR5_HUMAN Complement factor H-related protein 5 OS=Homo sapiens GN=CFHR5 PE=1 SV=1         | 0.37 |
| >sp P13671 CO6_HUMAN Complement component C6 OS=Homo sapiens GN=C6 PE=1 SV=3                           | 0.37 |
| >sp P02748 CO9_HUMAN Complement component C9 OS=Homo sapiens GN=C9 PE=1 SV=2                           | 0.37 |
| >sp P01766 HV305_HUMAN Ig heavy chain V-III region BRO OS=Homo sapiens PE=1 SV=1                       | 0.36 |
| >sp P07360 CO8G_HUMAN Complement component C8 gamma chain OS=Homo sapiens GN=C8G PE=1 SV=3             | 0.36 |
| >sp P05452 TETN_HUMAN Tetranectin OS=Homo sapiens GN=CLEC3B PE=1 SV=3                                  | 0.36 |
| >sp P02776 PLF4_HUMAN Platelet factor 4 OS=Homo sapiens GN=PF4 PE=1 SV=2                               | 0.36 |
| >sp P00450 CERU_HUMAN Ceruloplasmin OS=Homo sapiens GN=CP PE=1 SV=1                                    | 0.36 |
| >sp P60709 ACTB_HUMAN Actin, cytoplasmic 1 OS=Homo sapiens GN=ACTB PE=1 SV=1                           | 0.35 |
| >sp P33778 H2B1B_HUMAN Histone H2B type 1-B OS=Homo sapiens GN=HIST1H2BB PE=1 SV=2                     | 0.35 |
| >sp Q14624 ITIH4_HUMAN Inter-alpha-trypsin inhibitor heavy chain H4 OS=Homo sapiens GN=ITIH4 PE=1 SV=4 | 0.35 |
| >sp B9A064 IGLL5_HUMAN Immunoglobulin lambda-like polypeptide 5 OS=Homo sapiens GN=IGLL5 PE=2 SV=2     | 0.34 |
| >sp P07358 CO8B_HUMAN Complement component C8 beta chain OS=Homo sapiens GN=C8B PE=1 SV=3              | 0.33 |
| >sp P27918 PROP_HUMAN Properdin OS=Homo sapiens GN=CFP PE=1 SV=2                                       | 0.33 |
| >sp P02763 A1AG1_HUMAN Alpha-1-acid glycoprotein 1 OS=Homo sapiens GN=ORM1 PE=1 SV=1                   | 0.33 |
| >sp P03952 KLKB1_HUMAN Plasma kallikrein OS=Homo sapiens GN=KLKB1 PE=1 SV=1                            | 0.32 |
| >sp P01031 CO5_HUMAN Complement C5 OS=Homo sapiens GN=C5 PE=1 SV=4                                     | 0.31 |
| >sp P01860 IGHG3_HUMAN Ig gamma-3 chain C region OS=Homo sapiens GN=IGHG3 PE=1 SV=2                    | 0.31 |
| >sp P19827 ITIH1_HUMAN Inter-alpha-trypsin inhibitor heavy chain H1 OS=Homo sapiens GN=ITIH1 PE=1 SV=3 | 0.30 |
| >sp P23142 FBLN1_HUMAN Fibulin-1 OS=Homo sapiens GN=FBLN1 PE=1 SV=4                                    | 0.30 |
| >sp P19823 ITIH2_HUMAN Inter-alpha-trypsin inhibitor heavy chain H2 OS=Homo sapiens GN=ITIH2 PE=1 SV=2 | 0.30 |
| >sp P02746 C1QB_HUMAN Complement C1q subcomponent subunit B OS=Homo sapiens GN=C1QB PE=1 SV=3          | 0.29 |
| >sp P00751 CFAB_HUMAN Complement factor B OS=Homo sapiens GN=CFB PE=1 SV=2                             | 0.29 |
| >sp P00748 FA12_HUMAN Coagulation factor XII OS=Homo sapiens GN=F12 PE=1 SV=3                          | 0.28 |
| >sp P20671 H2A1D_HUMAN Histone H2A type 1-D OS=Homo sapiens GN=HIST1H2AD PE=1 SV=2                     | 0.28 |
| >sp P00736 C1R_HUMAN Complement C1r subcomponent OS=Homo sapiens GN=C1R PE=1 SV=2                      | 0.28 |
| >sp P10599 THIO_HUMAN Thioredoxin OS=Homo sapiens GN=TXN PE=1 SV=3                                     | 0.28 |
| >sp ALBU_HUMAN (Common contaminant protein)                                                            | 0.28 |
| >sp O43866 CD5L_HUMAN CD5 antigen-like OS=Homo sapiens GN=CD5L PE=1 SV=1                               | 0.27 |
| >sp P18428 LBP_HUMAN Lipopolysaccharide-binding protein OS=Homo sapiens GN=LBP PE=1 SV=3               | 0.27 |

|    |                         |                                                              |      |
|----|-------------------------|--------------------------------------------------------------|------|
| 1  |                         |                                                              |      |
| 2  |                         |                                                              |      |
| 3  | >sp P01596 KV104_HUMAN  | Ig kappa chain V-I region CAR OS=Homo sapiens PE=1 SV=1      | 0.27 |
| 4  | >sp Q01469 FABP5_HUMAN  | Fatty acid-binding protein, epidermal OS=Homo sapiens        | 0.27 |
| 5  |                         | GN=FABP5 PE=1 SV=3                                           |      |
| 6  | >sp P01767 HV306_HUMAN  | Ig heavy chain V-III region BUT OS=Homo sapiens PE=1 SV=1    | 0.25 |
| 7  | >sp P10643 CO7_HUMAN    | Complement component C7 OS=Homo sapiens GN=C7 PE=1           | 0.25 |
| 8  |                         | SV=2                                                         |      |
| 9  | >sp P07357 CO8A_HUMAN   | Complement component C8 alpha chain OS=Homo sapiens          | 0.25 |
| 10 |                         | GN=C8A PE=1 SV=2                                             |      |
| 11 | >sp Q9NZT1 CALL5_HUMAN  | Calmodulin-like protein 5 OS=Homo sapiens GN=CALML5          | 0.25 |
| 12 |                         | PE=1 SV=2                                                    |      |
| 13 | >sp P00739-2 HPTR_HUMAN | Isoform 2 of Haptoglobin-related protein OS=Homo sapiens     | 0.25 |
| 14 |                         | GN=HPR                                                       |      |
| 15 | >sp Q13790 APOF_HUMAN   | Apolipoprotein F OS=Homo sapiens GN=APOF PE=1 SV=2           | 0.25 |
| 16 | >sp P36955 PEDF_HUMAN   | Pigment epithelium-derived factor OS=Homo sapiens            | 0.24 |
| 17 |                         | GN=SERPINF1 PE=1 SV=4                                        |      |
| 18 | >sp P04220 MUCB_HUMAN   | Ig mu heavy chain disease protein OS=Homo sapiens PE=1       | 0.24 |
| 19 |                         | SV=1                                                         |      |
| 20 | >sp P84077 ARF1_HUMAN   | ADP-ribosylation factor 1 OS=Homo sapiens GN=ARF1 PE=1       | 0.24 |
| 21 |                         | SV=2                                                         |      |
| 22 | >sp P06312 KV401_HUMAN  | Ig kappa chain V-IV region (Fragment) OS=Homo sapiens        | 0.24 |
| 23 |                         | GN=IGKV4-1 PE=4 SV=1                                         |      |
| 24 | >sp P04406 G3P_HUMAN    | Glyceraldehyde-3-phosphate dehydrogenase OS=Homo sapiens     | 0.24 |
| 25 |                         | GN=GAPDH PE=1 SV=3                                           |      |
| 26 | >sp P29622 KAIN_HUMAN   | Kallistatin OS=Homo sapiens GN=SERPINA4 PE=1 SV=3            | 0.24 |
| 27 | >sp P61224 RAP1B_HUMAN  | Ras-related protein Rap-1b OS=Homo sapiens GN=RAP1B          | 0.24 |
| 28 |                         | PE=1 SV=1                                                    |      |
| 29 | >sp P08697 A2AP_HUMAN   | Alpha-2-antiplasmin OS=Homo sapiens GN=SERPINF2 PE=1         | 0.24 |
| 30 |                         | SV=3                                                         |      |
| 31 | >sp P07225 PROS_HUMAN   | Vitamin K-dependent protein S OS=Homo sapiens GN=PROS1       | 0.24 |
| 32 |                         | PE=1 SV=1                                                    |      |
| 33 | >sp P43652 AFAM_HUMAN   | Afamin OS=Homo sapiens GN=AFM PE=1 SV=1                      | 0.23 |
| 34 | >sp Q9UHG3 PCYOX_HUMAN  | Preylcysteine oxidase 1 OS=Homo sapiens GN=PCYOX1            | 0.23 |
| 35 |                         | PE=1 SV=3                                                    |      |
| 36 | >sp P22352 GPX3_HUMAN   | Glutathione peroxidase 3 OS=Homo sapiens GN=GPX3 PE=1        | 0.23 |
| 37 |                         | SV=2                                                         |      |
| 38 | >sp Q03591 FHR1_HUMAN   | Complement factor H-related protein 1 OS=Homo sapiens        | 0.22 |
| 39 |                         | GN=CFHR1 PE=1 SV=2                                           |      |
| 40 | >sp P08571 CD14_HUMAN   | Monocyte differentiation antigen CD14 OS=Homo sapiens        | 0.21 |
| 41 |                         | GN=CD14 PE=1 SV=2                                            |      |
| 42 | >sp Q9UK55 ZPI_HUMAN    | Protein Z-dependent protease inhibitor OS=Homo sapiens       | 0.21 |
| 43 |                         | GN=SERPINA10 PE=1 SV=1                                       |      |
| 44 | >sp P62805 H4_HUMAN     | Histone H4 OS=Homo sapiens GN=HIST1H4A PE=1 SV=2             | 0.21 |
| 45 | >sp P69905 HBA_HUMAN    | Hemoglobin subunit alpha OS=Homo sapiens GN=HBA1 PE=1        | 0.21 |
| 46 |                         | SV=2                                                         |      |
| 47 | >sp P05546 HEP2_HUMAN   | Heparin cofactor 2 OS=Homo sapiens GN=SERPIND1 PE=1          | 0.20 |
| 48 |                         | SV=3                                                         |      |
| 49 | >sp P35326 SPR2A_HUMAN  | Small proline-rich protein 2A OS=Homo sapiens GN=SPRR2A      | 0.20 |
| 50 |                         | PE=2 SV=1                                                    |      |
| 51 | >sp P26038 MOES_HUMAN   | Moesin OS=Homo sapiens GN=MSN PE=1 SV=3                      | 0.20 |
| 52 | >sp P09871 C1S_HUMAN    | Complement C1s subcomponent OS=Homo sapiens GN=C1S           | 0.20 |
| 53 |                         | PE=1 SV=1                                                    |      |
| 54 | >sp P01624 KV306_HUMAN  | Ig kappa chain V-III region POM OS=Homo sapiens PE=1 SV=1    | 0.20 |
| 55 | >sp P08519 APOA_HUMAN   | Apolipoprotein(a) OS=Homo sapiens GN=LPA PE=1 SV=1           | 0.20 |
| 56 | >sp P12273 PIP_HUMAN    | Prolactin-inducible protein OS=Homo sapiens GN=PIP PE=1 SV=1 | 0.20 |
| 57 | >sp P03950 ANGI_HUMAN   | Angiogenin OS=Homo sapiens GN=ANG PE=1 SV=1                  | 0.20 |
| 58 |                         |                                                              |      |
| 59 |                         |                                                              |      |
| 60 |                         |                                                              |      |

|    |                          |                                                                |      |
|----|--------------------------|----------------------------------------------------------------|------|
| 1  |                          |                                                                |      |
| 2  |                          |                                                                |      |
| 3  | >sp P08185 CBG_HUMAN     | Corticosteroid-binding globulin OS=Homo sapiens                | 0.20 |
| 4  |                          | GN=SERPINA6 PE=1 SV=1                                          |      |
| 5  | >sp P02743 SAMP_HUMAN    | Serum amyloid P-component OS=Homo sapiens GN=APCS              | 0.20 |
| 6  |                          | PE=1 SV=2                                                      |      |
| 7  | >sp P01613 KV121_HUMAN   | Ig kappa chain V-I region Ni OS=Homo sapiens PE=1 SV=1         | 0.20 |
| 8  | >sp P01617 KV204_HUMAN   | Ig kappa chain V-II region TEW OS=Homo sapiens PE=1 SV=1       | 0.19 |
| 9  | >sp P01877 IGHA2_HUMAN   | Ig alpha-2 chain C region OS=Homo sapiens GN=IGHA2 PE=1        | 0.19 |
| 10 |                          | SV=3                                                           |      |
| 11 | >sp P11597 CETP_HUMAN    | Cholesteryl ester transfer protein OS=Homo sapiens GN=CETP     | 0.19 |
| 12 |                          | PE=1 SV=2                                                      |      |
| 13 | >sp P04217 A1BG_HUMAN    | Alpha-1B-glycoprotein OS=Homo sapiens GN=A1BG PE=1             | 0.19 |
| 14 |                          | SV=4                                                           |      |
| 15 | >sp P05155 IC1_HUMAN     | Plasma protease C1 inhibitor OS=Homo sapiens GN=SERPING1       | 0.19 |
| 16 |                          | PE=1 SV=2                                                      |      |
| 17 | >sp P01764 HV303_HUMAN   | Ig heavy chain V-III region VH26 OS=Homo sapiens PE=1 SV=1     | 0.19 |
| 18 | >sp P35858 ALS_HUMAN     | Insulin-like growth factor-binding protein complex acid labile | 0.18 |
| 19 |                          | subunit OS=Homo sapiens GN=IGFALS PE=1 SV=1                    |      |
| 20 | >sp P63104 1433Z_HUMAN   | 14-3-3 protein zeta/delta OS=Homo sapiens GN=YWHAZ PE=1        | 0.18 |
| 21 |                          | SV=1                                                           |      |
| 22 | >sp P02747 C1QC_HUMAN    | Complement C1q subcomponent subunit C OS=Homo sapiens          | 0.18 |
| 23 |                          | GN=C1QC PE=1 SV=3                                              |      |
| 24 | >sp P55058 PLTP_HUMAN    | Phospholipid transfer protein OS=Homo sapiens GN=PLTP          | 0.18 |
| 25 |                          | PE=1 SV=1                                                      |      |
| 26 | >sp P05543 THBG_HUMAN    | Thyroxine-binding globulin OS=Homo sapiens GN=SERPINA7         | 0.18 |
| 27 |                          | PE=1 SV=2                                                      |      |
| 28 | >sp P23528 COF1_HUMAN    | Cofilin-1 OS=Homo sapiens GN=CFL1 PE=1 SV=3                    | 0.18 |
| 29 | >sp Q9Y5C1 ANGL3_HUMAN   | Angiopoietin-related protein 3 OS=Homo sapiens                 | 0.17 |
| 30 |                          | GN=ANGPTL3 PE=1 SV=1                                           |      |
| 31 | >sp P01772 HV311_HUMAN   | Ig heavy chain V-III region KOL OS=Homo sapiens PE=1 SV=1      | 0.17 |
| 32 | >sp P49908 SEPP1_HUMAN   | Selenoprotein P OS=Homo sapiens GN=SEPP1 PE=1 SV=3             | 0.17 |
| 33 | >sp P25311 ZA2G_HUMAN    | Zinc-alpha-2-glycoprotein OS=Homo sapiens GN=AZGP1 PE=1        | 0.17 |
| 34 |                          | SV=2                                                           |      |
| 35 | >sp P01042-2 KNG1_HUMAN  | Isoform LMW of Kininogen-1 OS=Homo sapiens GN=KNG1             | 0.17 |
| 36 | >sp A8MW06 TMSL3_HUMAN   | Thymosin beta-4-like protein 3 OS=Homo sapiens GN=TMSL3        | 0.17 |
| 37 |                          | PE=2 SV=1                                                      |      |
| 38 | >sp P14770 GPIX_HUMAN    | Platelet glycoprotein IX OS=Homo sapiens GN=GP9 PE=1 SV=3      | 0.16 |
| 39 | >sp Q13418 ILK_HUMAN     | Integrin-linked protein kinase OS=Homo sapiens GN=ILK PE=1     | 0.16 |
| 40 |                          | SV=2                                                           |      |
| 41 | >sp P08514-2 ITA2B_HUMAN | Isoform 2 of Integrin alpha-IIb OS=Homo sapiens GN=ITGA2B      | 0.16 |
| 42 | >sp P07737 PROF1_HUMAN   | Profilin-1 OS=Homo sapiens GN=PFN1 PE=1 SV=2                   | 0.16 |
| 43 | >sp Q86UX7 URP2_HUMAN    | Fermitin family homolog 3 OS=Homo sapiens GN=FERMT3            | 0.15 |
| 44 |                          | PE=1 SV=1                                                      |      |
| 45 | >sp P01880-2 IGHD_HUMAN  | Isoform 2 of Ig delta chain C region OS=Homo sapiens           | 0.15 |
| 46 |                          | GN=IGHD                                                        |      |
| 47 | >sp P63000 RAC1_HUMAN    | Ras-related C3 botulinum toxin substrate 1 OS=Homo sapiens     | 0.15 |
| 48 |                          | GN=RAC1 PE=1 SV=1                                              |      |
| 49 | >sp P05156 CFAI_HUMAN    | Complement factor I OS=Homo sapiens GN=CFI PE=1 SV=2           | 0.15 |
| 50 | >sp P07996 TSP1_HUMAN    | Thrombospondin-1 OS=Homo sapiens GN=THBS1 PE=1 SV=2            | 0.15 |
| 51 | >sp P02745 C1QA_HUMAN    | Complement C1q subcomponent subunit A OS=Homo sapiens          | 0.15 |
| 52 |                          | GN=C1QA PE=1 SV=2                                              |      |
| 53 | >sp P02042 HBD_HUMAN     | Hemoglobin subunit delta OS=Homo sapiens GN=HBD PE=1           | 0.15 |
| 54 |                          | SV=2                                                           |      |
| 55 | >sp P02750 A2GL_HUMAN    | Leucine-rich alpha-2-glycoprotein OS=Homo sapiens GN=LRG1      | 0.15 |
| 56 |                          | PE=1 SV=2                                                      |      |
| 57 | >sp P01621 KV303_HUMAN   | Ig kappa chain V-III region NG9 (Fragment) OS=Homo sapiens     | 0.15 |
| 58 |                          |                                                                |      |
| 59 |                          |                                                                |      |
| 60 |                          |                                                                |      |



|    |                          |                                                         |      |
|----|--------------------------|---------------------------------------------------------|------|
| 1  |                          |                                                         |      |
| 2  |                          |                                                         |      |
| 3  |                          |                                                         |      |
| 4  |                          | PE=1 SV=1                                               |      |
| 5  | >sp P04899 GNAI2_HUMAN   | Guanine nucleotide-binding protein G(i) subunit alpha-2 | 0.14 |
| 6  |                          | OS=Homo sapiens GN=GNAI2 PE=1 SV=3                      |      |
| 7  | >sp Q9NP55 BPIA1_HUMAN   | BPI fold-containing family A member 1                   | 0.14 |
| 8  |                          | OS=Homo sapiens GN=BPIFA1 PE=1 SV=1                     |      |
| 9  | >sp P04792 HSPB1_HUMAN   | Heat shock protein beta-1                               | 0.14 |
| 10 |                          | OS=Homo sapiens GN=HSPB1 PE=1 SV=2                      |      |
| 11 | >sp P01703 LV105_HUMAN   | Ig lambda chain V-I region NEWM                         | 0.14 |
| 12 |                          | OS=Homo sapiens PE=1 SV=1                               |      |
| 13 | >sp Q9HDC9 APMAP_HUMAN   | Adipocyte plasma membrane-associated protein            | 0.14 |
| 14 |                          | OS=Homo sapiens GN=APMAP PE=1 SV=2                      |      |
| 15 | >sp Q96PD5 PGRP2_HUMAN   | N-acetylmuramoyl-L-alanine amidase                      | 0.14 |
| 16 |                          | OS=Homo sapiens GN=PGLYRP2 PE=1 SV=1                    |      |
| 17 | >sp P16671 CD36_HUMAN    | Platelet glycoprotein 4                                 | 0.14 |
| 18 |                          | OS=Homo sapiens GN=CD36 PE=1 SV=2                       |      |
| 19 | >sp P35247 SFTPD_HUMAN   | Pulmonary surfactant-associated protein D               | 0.14 |
| 20 |                          | OS=Homo sapiens GN=SFTPD PE=1 SV=3                      |      |
| 21 | >sp P01019 ANGT_HUMAN    | Angiotensinogen                                         | 0.14 |
| 22 |                          | OS=Homo sapiens GN=AGT PE=1 SV=1                        |      |
| 23 | >sp P01611 KV119_HUMAN   | Ig kappa chain V-I region Wes                           | 0.14 |
| 24 |                          | OS=Homo sapiens PE=1 SV=1                               |      |
| 25 | >sp P01597 KV105_HUMAN   | Ig kappa chain V-I region DEE                           | 0.14 |
| 26 |                          | OS=Homo sapiens PE=1 SV=1                               |      |
| 27 | >sp P02786 TFR1_HUMAN    | Transferrin receptor protein 1                          | 0.13 |
| 28 |                          | OS=Homo sapiens GN=TFRC PE=1 SV=2                       |      |
| 29 | >sp P04208 LV106_HUMAN   | Ig lambda chain V-I region WAH                          | 0.13 |
| 30 |                          | OS=Homo sapiens PE=1 SV=1                               |      |
| 31 | >sp P04206 KV307_HUMAN   | Ig kappa chain V-III region GOL                         | 0.13 |
| 32 |                          | OS=Homo sapiens PE=1 SV=1                               |      |
| 33 | >sp P81605 DCD_HUMAN     | Dermcidin                                               | 0.13 |
| 34 |                          | OS=Homo sapiens GN=DCD PE=1 SV=2                        |      |
| 35 | >sp Q9Y490 TLN1_HUMAN    | Talin-1                                                 | 0.13 |
| 36 |                          | OS=Homo sapiens GN=TLN1 PE=1 SV=3                       |      |
| 37 | >sp P05164-3 PERM_HUMAN  | Isoform H7 of Myeloperoxidase                           | 0.13 |
| 38 |                          | OS=Homo sapiens GN=MPO                                  |      |
| 39 | >sp P06318 LV604_HUMAN   | Ig lambda chain V-VI region WLT                         | 0.13 |
| 40 |                          | OS=Homo sapiens PE=1 SV=1                               |      |
| 41 | >sp P05106-2 ITB3_HUMAN  | Isoform Beta-3B of Integrin beta-3                      | 0.13 |
| 42 |                          | OS=Homo sapiens GN=ITGB3                                |      |
| 43 | >sp P30041 PRDX6_HUMAN   | Peroxiredoxin-6                                         | 0.13 |
| 44 |                          | OS=Homo sapiens GN=PRDX6 PE=1 SV=3                      |      |
| 45 | >sp P01616 KV203_HUMAN   | Ig kappa chain V-II region MIL                          | 0.13 |
| 46 |                          | OS=Homo sapiens PE=1 SV=1                               |      |
| 47 | >sp P01614 KV201_HUMAN   | Ig kappa chain V-II region Cum                          | 0.13 |
| 48 |                          | OS=Homo sapiens PE=1 SV=1                               |      |
| 49 | >sp Q06033 ITIH3_HUMAN   | Inter-alpha-trypsin inhibitor heavy chain H3            | 0.12 |
| 50 |                          | OS=Homo sapiens GN=ITIH3 PE=1 SV=2                      |      |
| 51 | >sp Q96IY4-2 CBPB2_HUMAN | Isoform 2 of Carboxypeptidase B2                        | 0.12 |
| 52 |                          | OS=Homo sapiens GN=CPB2                                 |      |
| 53 | >sp P12259 FA5_HUMAN     | Coagulation factor V                                    | 0.12 |
| 54 |                          | OS=Homo sapiens GN=F5 PE=1 SV=4                         |      |
| 55 | >sp P06733 ENOA_HUMAN    | Alpha-enolase                                           | 0.12 |
| 56 |                          | OS=Homo sapiens GN=ENO1 PE=1 SV=2                       |      |
| 57 | >sp P04180 LCAT_HUMAN    | Phosphatidylcholine-sterol acyltransferase              | 0.12 |
| 58 |                          | OS=Homo sapiens GN=LCAT PE=1 SV=1                       |      |
| 59 | >sp P20851 C4BPB_HUMAN   | C4b-binding protein beta chain                          | 0.12 |
| 60 |                          | OS=Homo sapiens GN=C4BPB PE=1 SV=1                      |      |
|    | >sp P15153 RAC2_HUMAN    | Ras-related C3 botulinum toxin substrate 2              | 0.11 |
|    |                          | OS=Homo sapiens GN=RAC2 PE=1 SV=1                       |      |
|    | >sp P60763 RAC3_HUMAN    | Ras-related C3 botulinum toxin substrate 3              | 0.11 |
|    |                          | OS=Homo sapiens GN=RAC3 PE=1 SV=1                       |      |
|    | >sp P02775 CXCL7_HUMAN   | Platelet basic protein                                  | 0.11 |
|    |                          | OS=Homo sapiens GN=PPBP PE=1 SV=3                       |      |
|    | >sp Q06830 PRDX1_HUMAN   | Peroxiredoxin-1                                         | 0.11 |
|    |                          | OS=Homo sapiens GN=PRDX1 PE=1 SV=1                      |      |
|    | >sp P06310 KV206_HUMAN   | Ig kappa chain V-II region RPMI 6410                    | 0.11 |
|    |                          | OS=Homo sapiens PE=4 SV=1                               |      |
|    | >sp P36980 FHR2_HUMAN    | Complement factor H-related protein 2                   | 0.11 |
|    |                          | OS=Homo sapiens GN=CFHR2 PE=1 SV=1                      |      |
|    | >sp P51884 LUM_HUMAN     | Lumican                                                 | 0.11 |
|    |                          | OS=Homo sapiens GN=LUM PE=1 SV=2                        |      |
|    | >sp P02751-6 FINC_HUMAN  | Isoform 6 of Fibronectin                                | 0.11 |
|    |                          | OS=Homo sapiens GN=FN1                                  |      |
|    | >sp P03951 FA11_HUMAN    | Coagulation factor XI                                   | 0.11 |
|    |                          | OS=Homo sapiens GN=F11 PE=1 SV=1                        |      |

|    |                                                                                 |      |  |
|----|---------------------------------------------------------------------------------|------|--|
| 1  |                                                                                 |      |  |
| 2  |                                                                                 |      |  |
| 3  | >sp Q15166 PON3_HUMAN Serum paraoxonase/lactonase 3 OS=Homo sapiens GN=PON3     | 0.10 |  |
| 4  | PE=1 SV=3                                                                       |      |  |
| 5  | >sp P27105 STOM_HUMAN Erythrocyte band 7 integral membrane protein OS=Homo      | 0.10 |  |
| 6  | sapiens GN=STOM PE=1 SV=3                                                       |      |  |
| 7  | >sp P02671 FIBA_HUMAN Fibrinogen alpha chain OS=Homo sapiens GN=FGA PE=1 SV=2   | 0.10 |  |
| 8  | >sp P30443 1A01_HUMAN HLA class I histocompatibility antigen, A-1 alpha chain   | 0.10 |  |
| 9  | OS=Homo sapiens GN=HLA-A PE=1 SV=1                                              |      |  |
| 10 | >sp P06331 HV209_HUMAN Ig heavy chain V-II region ARH-77 OS=Homo sapiens PE=4   | 0.10 |  |
| 11 | SV=1                                                                            |      |  |
| 12 | >sp O75636 FCN3_HUMAN Ficolin-3 OS=Homo sapiens GN=FCN3 PE=1 SV=2               | 0.10 |  |
| 13 | >sp P08603-2 CFAH_HUMAN Isoform 2 of Complement factor H OS=Homo sapiens        | 0.10 |  |
| 14 | GN=CFH                                                                          |      |  |
| 15 | >sp P60660 MYL6_HUMAN Myosin light polypeptide 6 OS=Homo sapiens GN=MYL6 PE=1   | 0.10 |  |
| 16 | SV=2                                                                            |      |  |
| 17 | >sp P14618-2 KPYM_HUMAN Isoform M1 of Pyruvate kinase isozymes M1/M2 OS=Homo    | 0.10 |  |
| 18 | sapiens GN=PKM2                                                                 |      |  |
| 19 | >sp ALBU_BOVIN (Common contaminant protein)                                     | 0.10 |  |
| 20 | >sp P22792 CPN2_HUMAN Carboxypeptidase N subunit 2 OS=Homo sapiens GN=CPN2      | 0.09 |  |
| 21 | PE=1 SV=3                                                                       |      |  |
| 22 | >sp O00299 CLIC1_HUMAN Chloride intracellular channel protein 1 OS=Homo sapiens | 0.09 |  |
| 23 | GN=CLIC1 PE=1 SV=4                                                              |      |  |
| 24 | >sp P31944 CASPE_HUMAN Caspase-14 OS=Homo sapiens GN=CASP14 PE=1 SV=2           | 0.09 |  |
| 25 | >sp P05154 IPSP_HUMAN Plasma serine protease inhibitor OS=Homo sapiens          | 0.09 |  |
| 26 | GN=SERPINA5 PE=1 SV=3                                                           |      |  |
| 27 | >sp P00742 FA10_HUMAN Coagulation factor X OS=Homo sapiens GN=F10 PE=1 SV=2     | 0.09 |  |
| 28 | >sp Q92954-3 PRG4_HUMAN Isoform C of Proteoglycan 4 OS=Homo sapiens GN=PRG4     | 0.09 |  |
| 29 | >sp Q02985 FHR3_HUMAN Complement factor H-related protein 3 OS=Homo sapiens     | 0.09 |  |
| 30 | GN=CFHR3 PE=1 SV=2                                                              |      |  |
| 31 | >sp P11226 MBL2_HUMAN Mannose-binding protein C OS=Homo sapiens GN=MBL2 PE=1    | 0.09 |  |
| 32 | SV=2                                                                            |      |  |
| 33 | >sp P14923 PLAK_HUMAN Junction plakoglobin OS=Homo sapiens GN=JUP PE=1 SV=3     | 0.09 |  |
| 34 | >sp P06681 CO2_HUMAN Complement C2 OS=Homo sapiens GN=C2 PE=1 SV=2              | 0.09 |  |
| 35 | >sp P80108 PHLD_HUMAN Phosphatidylinositol-glycan-specific phospholipase D      | 0.09 |  |
| 36 | OS=Homo sapiens GN=GPLD1 PE=1 SV=3                                              |      |  |
| 37 | >sp Q96KN2 CNDP1_HUMAN Beta-Ala-His dipeptidase OS=Homo sapiens GN=CNDP1        | 0.09 |  |
| 38 | PE=1 SV=4                                                                       |      |  |
| 39 | >sp P07355 ANXA2_HUMAN Annexin A2 OS=Homo sapiens GN=ANXA2 PE=1 SV=2            | 0.09 |  |
| 40 | >sp P01833 PIGR_HUMAN Polymeric immunoglobulin receptor OS=Homo sapiens         | 0.09 |  |
| 41 | GN=PIGR PE=1 SV=4                                                               |      |  |
| 42 | >sp P15169 CBPN_HUMAN Carboxypeptidase N catalytic chain OS=Homo sapiens        | 0.08 |  |
| 43 | GN=CPN1 PE=1 SV=1                                                               |      |  |
| 44 | >sp P00740 FA9_HUMAN Coagulation factor IX OS=Homo sapiens GN=F9 PE=1 SV=2      | 0.08 |  |
| 45 | >sp P04070 PROC_HUMAN Vitamin K-dependent protein C OS=Homo sapiens GN=PROC     | 0.08 |  |
| 46 | PE=1 SV=1                                                                       |      |  |
| 47 | >sp P14151 LYAM1_HUMAN L-selectin OS=Homo sapiens GN=SELL PE=1 SV=2             | 0.08 |  |
| 48 | >sp Q08554-2 DSC1_HUMAN Isoform 1B of Desmocollin-1 OS=Homo sapiens GN=DSC1     | 0.08 |  |
| 49 | >sp P59665 DEF1_HUMAN Neutrophil defensin 1 OS=Homo sapiens GN=DEFA1 PE=1 SV=1  | 0.08 |  |
| 50 | >sp P23229 ITA6_HUMAN Integrin alpha-6 OS=Homo sapiens GN=ITGA6 PE=1 SV=4       | 0.08 |  |
| 51 | >sp Q9NR31 SAR1A_HUMAN GTP-binding protein SAR1a OS=Homo sapiens GN=SAR1A       | 0.07 |  |
| 52 | PE=1 SV=1                                                                       |      |  |
| 53 | >sp P02787 TRFE_HUMAN Serotransferrin OS=Homo sapiens GN=TF PE=1 SV=3           | 0.07 |  |
| 54 | >sp P04278 SHBG_HUMAN Sex hormone-binding globulin OS=Homo sapiens GN=SHBG      | 0.07 |  |
| 55 | PE=1 SV=2                                                                       |      |  |
| 56 | >sp P31151 S10A7_HUMAN Protein S100-A7 OS=Homo sapiens GN=S100A7 PE=1 SV=4      | 0.07 |  |
| 57 | >sp Q5SY68 S1A7B_HUMAN Protein S100-A7-like 2 OS=Homo sapiens GN=S100A7L2 PE=2  | 0.07 |  |
| 58 |                                                                                 |      |  |
| 59 |                                                                                 |      |  |
| 60 |                                                                                 |      |  |

|    |  |                                                                                   |      |
|----|--|-----------------------------------------------------------------------------------|------|
| 1  |  |                                                                                   |      |
| 2  |  |                                                                                   |      |
| 3  |  |                                                                                   |      |
| 4  |  | <b>SV=1</b>                                                                       |      |
| 5  |  | >sp Q96GV9 CE030_HUMAN UPF0684 protein C5orf30 OS=Homo sapiens GN=C5orf30         | 0.07 |
| 6  |  | PE=1 SV=1                                                                         |      |
| 7  |  | >sp Q96QR1 SG3A1_HUMAN Secretoglobin family 3A member 1 OS=Homo sapiens           | 0.07 |
| 8  |  | GN=SCGB3A1 PE=1 SV=2                                                              |      |
| 9  |  | >sp P00558 PGK1_HUMAN Phosphoglycerate kinase 1 OS=Homo sapiens GN=PGK1 PE=1      | 0.07 |
| 10 |  | SV=3                                                                              |      |
| 11 |  | >sp Q02413 DSG1_HUMAN Desmoglein-1 OS=Homo sapiens GN=DSG1 PE=1 SV=2              | 0.07 |
| 12 |  | >sp P0CF74 LAC6_HUMAN Ig lambda-6 chain C region OS=Homo sapiens GN=IGLC6 PE=4    | 0.07 |
| 13 |  | SV=1                                                                              |      |
| 14 |  | >sp P06889 LV405_HUMAN Ig lambda chain V-IV region MOL OS=Homo sapiens PE=1 SV=1  | 0.07 |
| 15 |  | >sp P57735 RAB25_HUMAN Ras-related protein Rab-25 OS=Homo sapiens GN=RAB25        | 0.07 |
| 16 |  | PE=1 SV=2                                                                         |      |
| 17 |  | >sp CAS1_BOVIN (Common contaminant protein)                                       | 0.07 |
| 18 |  | >sp P01717 LV403_HUMAN Ig lambda chain V-IV region Hil OS=Homo sapiens PE=1 SV=1  | 0.07 |
| 19 |  | >sp P01714 LV301_HUMAN Ig lambda chain V-III region SH OS=Homo sapiens PE=1 SV=1  | 0.07 |
| 20 |  | >sp P01593 KV101_HUMAN Ig kappa chain V-I region AG OS=Homo sapiens PE=1 SV=1     | 0.07 |
| 21 |  | >sp P01609 KV117_HUMAN Ig kappa chain V-I region Scw OS=Homo sapiens PE=1 SV=1    | 0.07 |
| 22 |  | >sp P01612 KV120_HUMAN Ig kappa chain V-I region Mev OS=Homo sapiens PE=1 SV=1    | 0.07 |
| 23 |  | >sp P01701 LV103_HUMAN Ig lambda chain V-I region NEW OS=Homo sapiens PE=1 SV=1   | 0.07 |
| 24 |  | >sp P01702 LV104_HUMAN Ig lambda chain V-I region NIG-64 OS=Homo sapiens PE=1     | 0.07 |
| 25 |  | SV=1                                                                              |      |
| 26 |  | >sp P01699 LV101_HUMAN Ig lambda chain V-I region VOR OS=Homo sapiens PE=1 SV=1   | 0.07 |
| 27 |  | >sp Q9BYJ0 FGFP2_HUMAN Fibroblast growth factor-binding protein 2 OS=Homo sapiens | 0.07 |
| 28 |  | GN=FGFBP2 PE=1 SV=1                                                               |      |
| 29 |  | >sp Q08431-3 MFGM_HUMAN Isoform 3 of Lactadherin OS=Homo sapiens GN=MFGE8         | 0.07 |
| 30 |  | >sp Q14520 HABP2_HUMAN Hyaluronan-binding protein 2 OS=Homo sapiens GN=HABP2      | 0.07 |
| 31 |  | PE=1 SV=1                                                                         |      |
| 32 |  | >sp P02741 CRP_HUMAN C-reactive protein OS=Homo sapiens GN=CRP PE=1 SV=1          | 0.07 |
| 33 |  | >sp P04209 LV211_HUMAN Ig lambda chain V-II region NIG-84 OS=Homo sapiens PE=1    | 0.07 |
| 34 |  | SV=1                                                                              |      |
| 35 |  | >sp P01625 KV402_HUMAN Ig kappa chain V-IV region Len OS=Homo sapiens PE=1 SV=2   | 0.06 |
| 36 |  | >sp P01763 HV302_HUMAN Ig heavy chain V-III region WEA OS=Homo sapiens PE=1 SV=1  | 0.06 |
| 37 |  | >sp P04434 KV310_HUMAN Ig kappa chain V-III region VH (Fragment) OS=Homo sapiens  | 0.06 |
| 38 |  | PE=4 SV=1                                                                         |      |
| 39 |  | >sp P48740 MASP1_HUMAN Mannan-binding lectin serine protease 1 OS=Homo sapiens    | 0.06 |
| 40 |  | GN=MASP1 PE=1 SV=3                                                                |      |
| 41 |  | >sp P23083 HV103_HUMAN Ig heavy chain V-I region V35 OS=Homo sapiens PE=1 SV=1    | 0.06 |
| 42 |  | >sp P04211 LV001_HUMAN Ig lambda chain V region 4A OS=Homo sapiens PE=4 SV=1      | 0.06 |
| 43 |  | >sp P01601 KV109_HUMAN Ig kappa chain V-I region HK101 (Fragment) OS=Homo sapiens | 0.06 |
| 44 |  | PE=4 SV=1                                                                         |      |
| 45 |  | >sp P61769 B2MG_HUMAN Beta-2-microglobulin OS=Homo sapiens GN=B2M PE=1 SV=1       | 0.06 |
| 46 |  | >sp P01771 HV310_HUMAN Ig heavy chain V-III region HIL OS=Homo sapiens PE=1 SV=1  | 0.06 |
| 47 |  | >sp P58335 ANTR2_HUMAN Anthrax toxin receptor 2 OS=Homo sapiens GN=ANTXR2 PE=1    | 0.06 |
| 48 |  | SV=5                                                                              |      |
| 49 |  | >sp P02675 FIBB_HUMAN Fibrinogen beta chain OS=Homo sapiens GN=FGB PE=1 SV=2      | 0.06 |
| 50 |  | >sp Q8IWL2 SFTA1_HUMAN Pulmonary surfactant-associated protein A1 OS=Homo         | 0.06 |
| 51 |  | sapiens GN=SFTPA1 PE=1 SV=2                                                       |      |
| 52 |  | >sp P10646-2 TFPI1_HUMAN Isoform Beta of Tissue factor pathway inhibitor OS=Homo  | 0.06 |
| 53 |  | sapiens GN=TFPI                                                                   |      |
| 54 |  | >sp P01814 HV201_HUMAN Ig heavy chain V-II region OU OS=Homo sapiens PE=1 SV=1    | 0.06 |
| 55 |  | >sp Q9UGM5 FETUB_HUMAN Fetuin-B OS=Homo sapiens GN=FETUB PE=1 SV=2                | 0.06 |
| 56 |  | >sp P12814 ACTN1_HUMAN Alpha-actinin-1 OS=Homo sapiens GN=ACTN1 PE=1 SV=2         | 0.06 |
| 57 |  | >sp P62987 RL40_HUMAN Ubiquitin-60S ribosomal protein L40 OS=Homo sapiens         | 0.06 |
| 58 |  | GN=UBA52 PE=1 SV=2                                                                |      |
| 59 |  |                                                                                   |      |
| 60 |  |                                                                                   |      |

|    |                          |                                                                                          |      |
|----|--------------------------|------------------------------------------------------------------------------------------|------|
| 1  |                          |                                                                                          |      |
| 2  |                          |                                                                                          |      |
| 3  | >sp P18135 KV312_HUMAN   | Ig kappa chain V-III region HAH OS=Homo sapiens PE=2 SV=1                                | 0.06 |
| 4  | >sp P04431 KV123_HUMAN   | Ig kappa chain V-I region Walker OS=Homo sapiens PE=4 SV=1                               | 0.06 |
| 5  | >sp O60240 PLIN1_HUMAN   | Perilipin-1 OS=Homo sapiens GN=PLIN1 PE=2 SV=2                                           | 0.06 |
| 6  | >sp Q15404 RSU1_HUMAN    | Ras suppressor protein 1 OS=Homo sapiens GN=RSU1 PE=1 SV=3                               | 0.05 |
| 7  |                          |                                                                                          |      |
| 8  | >sp Q08188 TGM3_HUMAN    | Protein-glutamine gamma-glutamyltransferase E OS=Homo sapiens GN=TGM3 PE=1 SV=4          | 0.05 |
| 9  |                          |                                                                                          |      |
| 10 | >sp P15924 DESP_HUMAN    | Desmoplakin OS=Homo sapiens GN=DSP PE=1 SV=3                                             | 0.05 |
| 11 | >sp P17936 IBP3_HUMAN    | Insulin-like growth factor-binding protein 3 OS=Homo sapiens GN=IGFBP3 PE=1 SV=2         | 0.05 |
| 12 |                          |                                                                                          |      |
| 13 | >sp Q07954 LRP1_HUMAN    | Prolow-density lipoprotein receptor-related protein 1 OS=Homo sapiens GN=LRP1 PE=1 SV=2  | 0.05 |
| 14 |                          |                                                                                          |      |
| 15 | >sp P61626 LYSC_HUMAN    | Lysozyme C OS=Homo sapiens GN=LYZ PE=1 SV=1                                              | 0.05 |
| 16 | >sp O00560 SDCB1_HUMAN   | Syntenin-1 OS=Homo sapiens GN=SDCBP PE=1 SV=1                                            | 0.05 |
| 17 | >sp P62158 CALM_HUMAN    | Calmodulin OS=Homo sapiens GN=CALM1 PE=1 SV=2                                            | 0.05 |
| 18 | >sp O00391 QSOX1_HUMAN   | Sulfhydryl oxidase 1 OS=Homo sapiens GN=QSOX1 PE=1 SV=3                                  | 0.05 |
| 19 |                          |                                                                                          |      |
| 20 | >sp P02730 B3AT_HUMAN    | Band 3 anion transport protein OS=Homo sapiens GN=SLC4A1 PE=1 SV=3                       | 0.05 |
| 21 |                          |                                                                                          |      |
| 22 | >sp P23490 LORI_HUMAN    | Loricrin OS=Homo sapiens GN=LOR PE=1 SV=2                                                | 0.05 |
| 23 | >sp Q15485 FCN2_HUMAN    | Ficolin-2 OS=Homo sapiens GN=FCN2 PE=1 SV=2                                              | 0.05 |
| 24 | >sp Q9Y315 DEOC_HUMAN    | Putative deoxyribose-phosphate aldolase OS=Homo sapiens GN=DERA PE=1 SV=2                | 0.05 |
| 25 |                          |                                                                                          |      |
| 26 | >sp P05089 ARGI1_HUMAN   | Arginase-1 OS=Homo sapiens GN=ARG1 PE=1 SV=2                                             | 0.05 |
| 27 | >sp P18206 VINC_HUMAN    | Vinculin OS=Homo sapiens GN=VCL PE=1 SV=4                                                | 0.05 |
| 28 | >sp Q15555 MARE2_HUMAN   | Microtubule-associated protein RP/EB family member 2 OS=Homo sapiens GN=MAPRE2 PE=1 SV=1 | 0.04 |
| 29 |                          |                                                                                          |      |
| 30 | >sp Q04756 HGFA_HUMAN    | Hepatocyte growth factor activator OS=Homo sapiens GN=HGFA PE=1 SV=1                     | 0.04 |
| 31 |                          |                                                                                          |      |
| 32 | >sp P19105 ML12A_HUMAN   | Myosin regulatory light chain 12A OS=Homo sapiens GN=MYL12A PE=1 SV=2                    | 0.04 |
| 33 |                          |                                                                                          |      |
| 34 | >sp P00739 HPTR_HUMAN    | Haptoglobin-related protein OS=Homo sapiens GN=HPR PE=1 SV=2                             | 0.04 |
| 35 |                          |                                                                                          |      |
| 36 | >sp P08567 PLEK_HUMAN    | Pleckstrin OS=Homo sapiens GN=PLEK PE=1 SV=3                                             | 0.04 |
| 37 | >sp Q15517 CDSN_HUMAN    | Corneodesmosin OS=Homo sapiens GN=CDSN PE=1 SV=3                                         | 0.04 |
| 38 | >sp Q8N228-2 SCML4_HUMAN | Isoform 2 of Sex comb on midleg-like protein 4 OS=Homo sapiens GN=SCML4                  | 0.04 |
| 39 |                          |                                                                                          |      |
| 40 | >sp Q8TAQ9 SUN3_HUMAN    | SUN domain-containing protein 3 OS=Homo sapiens GN=SUN3 PE=2 SV=4                        | 0.04 |
| 41 |                          |                                                                                          |      |
| 42 | >sp P01344 IGF2_HUMAN    | Insulin-like growth factor II OS=Homo sapiens GN=IGF2 PE=1 SV=1                          | 0.04 |
| 43 |                          |                                                                                          |      |
| 44 | >sp Q9HBI1 PARVB_HUMAN   | Beta-parvin OS=Homo sapiens GN=PARVB PE=1 SV=1                                           | 0.04 |
| 45 | >sp A6NIZ1 RP1BL_HUMAN   | Ras-related protein Rap-1b-like protein OS=Homo sapiens PE=2 SV=1                        | 0.04 |
| 46 |                          |                                                                                          |      |
| 47 | >sp Q16610-4 ECM1_HUMAN  | Isoform 4 of Extracellular matrix protein 1 OS=Homo sapiens GN=ECM1                      | 0.04 |
| 48 |                          |                                                                                          |      |
| 49 | >sp P08134 RHOC_HUMAN    | Rho-related GTP-binding protein RhoC OS=Homo sapiens GN=RHOC PE=1 SV=1                   | 0.04 |
| 50 |                          |                                                                                          |      |
| 51 | >sp Q08380 LG3BP_HUMAN   | Galectin-3-binding protein OS=Homo sapiens GN=LGALS3BP PE=1 SV=1                         | 0.04 |
| 52 |                          |                                                                                          |      |
| 53 | >sp Q9BX93 PG12B_HUMAN   | Group XIIB secretory phospholipase A2-like protein OS=Homo sapiens GN=PLA2G12B PE=1 SV=2 | 0.04 |
| 54 |                          |                                                                                          |      |
| 55 | >sp P00451 FA8_HUMAN     | Coagulation factor VIII OS=Homo sapiens GN=F8 PE=1 SV=1                                  | 0.04 |
| 56 | >sp P05556-2 ITB1_HUMAN  | Isoform Beta-1B of Integrin beta-1 OS=Homo sapiens GN=ITGB1                              | 0.04 |
| 57 |                          |                                                                                          |      |
| 58 |                          |                                                                                          |      |
| 59 |                          |                                                                                          |      |
| 60 |                          |                                                                                          |      |

|    |                                                                                    |      |  |
|----|------------------------------------------------------------------------------------|------|--|
| 1  |                                                                                    |      |  |
| 2  |                                                                                    |      |  |
| 3  | >sp P32119 PRDX2_HUMAN Peroxiredoxin-2 OS=Homo sapiens GN=PRDX2 PE=1 SV=5          | 0.04 |  |
| 4  | >sp P37802 TAGL2_HUMAN Transgelin-2 OS=Homo sapiens GN=TAGLN2 PE=1 SV=3            | 0.04 |  |
| 5  | >sp Q96P63 SPB12_HUMAN Serpin B12 OS=Homo sapiens GN=SERPINB12 PE=1 SV=1           | 0.04 |  |
| 6  | >sp P00751-2 CFAB_HUMAN Isoform 2 of Complement factor B OS=Homo sapiens           | 0.04 |  |
| 7  | GN=CFB                                                                             |      |  |
| 8  | >sp O00161 SNP23_HUMAN Synaptosomal-associated protein 23 OS=Homo sapiens          | 0.03 |  |
| 9  | GN=SNAP23 PE=1 SV=1                                                                |      |  |
| 10 | >sp P15814 IGLL1_HUMAN Immunoglobulin lambda-like polypeptide 1 OS=Homo sapiens    | 0.03 |  |
| 11 | GN=IGLL1 PE=1 SV=1                                                                 |      |  |
| 12 | >sp Q5D862 FILA2_HUMAN Filaggrin-2 OS=Homo sapiens GN=FLG2 PE=1 SV=1               | 0.03 |  |
| 13 | >Reverse >sp Q15118 PDK1_HUMAN [Pyruvate dehydrogenase [lipoamide]] kinase         | 0.03 |  |
| 14 | isozyme 1, mitochondrial OS=Homo sapiens GN=PDK1 PE=1 SV=1                         |      |  |
| 15 | >sp Q6ZN30 BNC2_HUMAN Zinc finger protein basonuclein-2 OS=Homo sapiens GN=BNC2    | 0.03 |  |
| 16 | PE=2 SV=1                                                                          |      |  |
| 17 | >sp P05160 F13B_HUMAN Coagulation factor XIII B chain OS=Homo sapiens GN=F13B      | 0.03 |  |
| 18 | PE=1 SV=3                                                                          |      |  |
| 19 | >sp P04350 TBB4A_HUMAN Tubulin beta-4A chain OS=Homo sapiens GN=TUBB4A PE=1        | 0.03 |  |
| 20 | SV=2                                                                               |      |  |
| 21 | >sp Q71U36 TBA1A_HUMAN Tubulin alpha-1A chain OS=Homo sapiens GN=TUBA1A PE=1       | 0.03 |  |
| 22 | SV=1                                                                               |      |  |
| 23 | >sp P02679 FIBG_HUMAN Fibrinogen gamma chain OS=Homo sapiens GN=FGG PE=1           | 0.03 |  |
| 24 | SV=3                                                                               |      |  |
| 25 | >sp Q15582 BGH3_HUMAN Transforming growth factor-beta-induced protein ig-h3        | 0.03 |  |
| 26 | OS=Homo sapiens GN=TGFB1 PE=1 SV=1                                                 |      |  |
| 27 | >sp Q9UL12 SARDH_HUMAN Sarcosine dehydrogenase, mitochondrial OS=Homo sapiens      | 0.03 |  |
| 28 | GN=SARDH PE=1 SV=1                                                                 |      |  |
| 29 | >sp Q8NBP7 PCSK9_HUMAN Proprotein convertase subtilisin/kexin type 9 OS=Homo       | 0.03 |  |
| 30 | sapiens GN=PCSK9 PE=1 SV=3                                                         |      |  |
| 31 | >sp Q01518 CAP1_HUMAN Adenylyl cyclase-associated protein 1 OS=Homo sapiens        | 0.03 |  |
| 32 | GN=CAP1 PE=1 SV=5                                                                  |      |  |
| 33 | >sp P07384 CAN1_HUMAN Calpain-1 catalytic subunit OS=Homo sapiens GN=CAPN1 PE=1    | 0.03 |  |
| 34 | SV=1                                                                               |      |  |
| 35 | >sp Q9NZP8 C1RL_HUMAN Complement C1r subcomponent-like protein OS=Homo             | 0.03 |  |
| 36 | sapiens GN=C1RL PE=1 SV=2                                                          |      |  |
| 37 | >sp P16284 PECA1_HUMAN Platelet endothelial cell adhesion molecule OS=Homo sapiens | 0.03 |  |
| 38 | GN=PECAM1 PE=1 SV=1                                                                |      |  |
| 39 | >sp P13984 T2FB_HUMAN General transcription factor IIF subunit 2 OS=Homo sapiens   | 0.03 |  |
| 40 | GN=GTF2F2 PE=1 SV=2                                                                |      |  |
| 41 | >sp Q5T750 XP32_HUMAN Skin-specific protein 32 OS=Homo sapiens GN=XP32 PE=1        | 0.03 |  |
| 42 | SV=1                                                                               |      |  |
| 43 | >Reverse >sp P78415 IRX3_HUMAN Iroquois-class homeodomain protein IRX-3 OS=Homo    | 0.03 |  |
| 44 | sapiens GN=IRX3 PE=2 SV=3                                                          |      |  |
| 45 | >sp P48509 CD151_HUMAN CD151 antigen OS=Homo sapiens GN=CD151 PE=1 SV=3            | 0.03 |  |
| 46 | >sp Q7L5L3-1 GDPD3_HUMAN Isoform 2 of Glycerophosphodiester phosphodiesterase      | 0.03 |  |
| 47 | domain-containing protein 3 OS=Homo sapiens GN=GDPD3                               |      |  |
| 48 | >sp P35222 CTNB1_HUMAN Catenin beta-1 OS=Homo sapiens GN=CTNNB1 PE=1 SV=1          | 0.03 |  |
| 49 | >sp P08631 HCK_HUMAN Tyrosine-protein kinase HCK OS=Homo sapiens GN=HCK PE=1       | 0.03 |  |
| 50 | SV=5                                                                               |      |  |
| 51 | >sp P78371 TCPB_HUMAN T-complex protein 1 subunit beta OS=Homo sapiens GN=CCT2     | 0.03 |  |
| 52 | PE=1 SV=4                                                                          |      |  |
| 53 | >sp P04632 CPNS1_HUMAN Calpain small subunit 1 OS=Homo sapiens GN=CAPNS1 PE=1      | 0.03 |  |
| 54 | SV=1                                                                               |      |  |
| 55 | >sp P29972 AQP1_HUMAN Aquaporin-1 OS=Homo sapiens GN=AQP1 PE=1 SV=3                | 0.03 |  |
| 56 | >sp Q6ZVX7 NCRP1_HUMAN Non-specific cytotoxic cell receptor protein 1 homolog      | 0.03 |  |
| 57 | OS=Homo sapiens GN=NCCRP1 PE=1 SV=1                                                |      |  |
| 58 |                                                                                    |      |  |
| 59 |                                                                                    |      |  |
| 60 |                                                                                    |      |  |

|    |                                                                                                                              |      |
|----|------------------------------------------------------------------------------------------------------------------------------|------|
| 1  | >sp P07951 TPM2_HUMAN Tropomyosin beta chain OS=Homo sapiens GN=TPM2 PE=1 SV=1                                               | 0.03 |
| 2  |                                                                                                                              |      |
| 3  | >sp Q92839 HAS1_HUMAN Hyaluronan synthase 1 OS=Homo sapiens GN=HAS1 PE=1 SV=2                                                | 0.03 |
| 4  |                                                                                                                              |      |
| 5  | >Reverse >sp Q8NGI6 OR4DA_HUMAN Olfactory receptor 4D10 OS=Homo sapiens GN=OR4D10 PE=2 SV=1                                  | 0.02 |
| 6  |                                                                                                                              |      |
| 7  | >Reverse >sp Q9H1A3 METL9_HUMAN Methyltransferase-like protein 9 OS=Homo sapiens GN=METTL9 PE=2 SV=1                         | 0.02 |
| 8  |                                                                                                                              |      |
| 9  | >sp P17066 HSP76_HUMAN Heat shock 70 kDa protein 6 OS=Homo sapiens GN=HSPA6 PE=1 SV=2                                        | 0.02 |
| 10 |                                                                                                                              |      |
| 11 | >sp Q08722 CD47_HUMAN Leukocyte surface antigen CD47 OS=Homo sapiens GN=CD47 PE=1 SV=1                                       | 0.02 |
| 12 |                                                                                                                              |      |
| 13 | >Reverse >sp P51665 PSD7_HUMAN 26S proteasome non-ATPase regulatory subunit 7 OS=Homo sapiens GN=PSMD7 PE=1 SV=2             | 0.02 |
| 14 |                                                                                                                              |      |
| 15 | >sp P48059 LIMS1_HUMAN LIM and senescent cell antigen-like-containing domain protein 1 OS=Homo sapiens GN=LIMS1 PE=1 SV=4    | 0.02 |
| 16 |                                                                                                                              |      |
| 17 | >sp Q8WX94 NALP7_HUMAN NACHT, LRR and PYD domains-containing protein 7 OS=Homo sapiens GN=NLRP7 PE=1 SV=1                    | 0.02 |
| 18 |                                                                                                                              |      |
| 19 | >Reverse >sp Q86XE5 HOGA1_HUMAN Probable 4-hydroxy-2-oxoglutarate aldolase, mitochondrial OS=Homo sapiens GN=HOGA1 PE=1 SV=1 | 0.02 |
| 20 |                                                                                                                              |      |
| 21 | >Reverse >sp Q8NEU8 DP13B_HUMAN DCC-interacting protein 13-beta OS=Homo sapiens GN=APPL2 PE=1 SV=3                           | 0.02 |
| 22 |                                                                                                                              |      |
| 23 | >sp P17693 HLA_G_HUMAN HLA class I histocompatibility antigen, alpha chain G OS=Homo sapiens GN=HLA-G PE=1 SV=1              | 0.02 |
| 24 |                                                                                                                              |      |
| 25 | >sp Q9BUN1 CA056_HUMAN Uncharacterized protein C1orf56 OS=Homo sapiens GN=C1orf56 PE=1 SV=1                                  | 0.02 |
| 26 |                                                                                                                              |      |
| 27 | >sp P55103 INHBC_HUMAN Inhibin beta C chain OS=Homo sapiens GN=INHBC PE=1 SV=1                                               | 0.02 |
| 28 |                                                                                                                              |      |
| 29 | >sp Q12907 LMAN2_HUMAN Vesicular integral-membrane protein VIP36 OS=Homo sapiens GN=LMAN2 PE=1 SV=1                          | 0.02 |
| 30 |                                                                                                                              |      |
| 31 | >sp Q2TV78 MSTP9_HUMAN Putative macrophage-stimulating protein MSTP9 OS=Homo sapiens GN=MST1P9 PE=5 SV=2                     | 0.02 |
| 32 |                                                                                                                              |      |
| 33 | >Reverse >sp Q9H8G2 CI082_HUMAN Uncharacterized protein C9orf82 OS=Homo sapiens GN=C9orf82 PE=1 SV=2                         | 0.02 |
| 34 |                                                                                                                              |      |
| 35 | >Reverse >sp Q6PF15 KLH35_HUMAN Kelch-like protein 35 OS=Homo sapiens GN=KLHL35 PE=2 SV=2                                    | 0.02 |
| 36 |                                                                                                                              |      |
| 37 | >sp P01892 1A02_HUMAN HLA class I histocompatibility antigen, A-2 alpha chain OS=Homo sapiens GN=HLA-A PE=1 SV=1             | 0.02 |
| 38 |                                                                                                                              |      |
| 39 | >sp P30508 1C12_HUMAN HLA class I histocompatibility antigen, Cw-12 alpha chain OS=Homo sapiens GN=HLA-C PE=1 SV=2           | 0.02 |
| 40 |                                                                                                                              |      |
| 41 | >sp O14672 ADA10_HUMAN Disintegrin and metalloproteinase domain-containing protein 10 OS=Homo sapiens GN=ADAM10 PE=1 SV=1    | 0.02 |
| 42 |                                                                                                                              |      |
| 43 | >sp P48740-3 MASP1_HUMAN Isoform 3 of Mannan-binding lectin serine protease 1 OS=Homo sapiens GN=MASP1                       | 0.02 |
| 44 |                                                                                                                              |      |
| 45 | >sp P06396 GELS_HUMAN Gelsolin OS=Homo sapiens GN=GSN PE=1 SV=1                                                              | 0.02 |
| 46 |                                                                                                                              |      |
| 47 | >sp Q7Z6K1 THAP5_HUMAN THAP domain-containing protein 5 OS=Homo sapiens GN=THAP5 PE=1 SV=2                                   | 0.02 |
| 48 |                                                                                                                              |      |
| 49 | >sp P04275 VWF_HUMAN von Willebrand factor OS=Homo sapiens GN=VWF PE=1 SV=4                                                  | 0.02 |
| 50 |                                                                                                                              |      |
| 51 | >Reverse >sp O95390 GDF11_HUMAN Growth/differentiation factor 11 OS=Homo sapiens GN=GDF11 PE=2 SV=1                          | 0.02 |
| 52 |                                                                                                                              |      |
| 53 | >sp Q96NU7 HUTI_HUMAN Probable imidazolonepropionase OS=Homo sapiens GN=AMDHD1 PE=2 SV=2                                     | 0.02 |
| 54 |                                                                                                                              |      |
| 55 | >sp Q9UIF3 TEKT2_HUMAN Tektin-2 OS=Homo sapiens GN=TEKT2 PE=1 SV=1                                                           | 0.02 |
| 56 |                                                                                                                              |      |
| 57 | >sp P13929 ENOB_HUMAN Beta-enolase OS=Homo sapiens GN=ENO3 PE=1 SV=4                                                         | 0.02 |
| 58 |                                                                                                                              |      |
| 59 | >sp Q13093 PAFA_HUMAN Platelet-activating factor acetylhydrolase OS=Homo sapiens GN=PLA2G7 PE=1 SV=1                         | 0.02 |
| 60 |                                                                                                                              |      |

|    |                                              |                                                                                                         |      |
|----|----------------------------------------------|---------------------------------------------------------------------------------------------------------|------|
| 1  |                                              |                                                                                                         |      |
| 2  |                                              |                                                                                                         |      |
| 3  | >sp Q12913 PTPRJ_HUMAN                       | Receptor-type tyrosine-protein phosphatase eta OS=Homo sapiens GN=PTPRJ PE=1 SV=3                       | 0.02 |
| 4  | >sp Q13867 BLMH_HUMAN                        | Bleomycin hydrolase OS=Homo sapiens GN=BLMH PE=1 SV=1                                                   | 0.02 |
| 5  | >sp P68104 EF1A1_HUMAN                       | Elongation factor 1-alpha 1 OS=Homo sapiens GN=EEF1A1 PE=1 SV=1                                         | 0.02 |
| 6  | >sp P01871-2 IGHM_HUMAN                      | Isoform 2 of Ig mu chain C region OS=Homo sapiens GN=IGHM                                               | 0.02 |
| 7  | >sp O75882 ATRN_HUMAN                        | Attractin OS=Homo sapiens GN=ATRN PE=1 SV=2                                                             | 0.02 |
| 8  | >sp P02751 FINC_HUMAN                        | Fibronectin OS=Homo sapiens GN=FN1 PE=1 SV=4                                                            | 0.02 |
| 9  | >sp Q8NDH2 CC168_HUMAN                       | Coiled-coil domain-containing protein 168 OS=Homo sapiens GN=CCDC168 PE=2 SV=2                          | 0.01 |
| 10 | >sp P11166 GTR1_HUMAN                        | Solute carrier family 2, facilitated glucose transporter member 1 OS=Homo sapiens GN=SLC2A1 PE=1 SV=2   | 0.01 |
| 11 | >sp Q8TDB8 GTR14_HUMAN                       | Solute carrier family 2, facilitated glucose transporter member 14 OS=Homo sapiens GN=SLC2A14 PE=2 SV=1 | 0.01 |
| 12 | >Reverse >sp Q9NVN3 RIC8B_HUMAN              | Synembryn-B OS=Homo sapiens GN=RIC8B PE=1 SV=2                                                          | 0.01 |
| 13 | >sp P07602 SAP_HUMAN                         | Proactivator polypeptide OS=Homo sapiens GN=PSAP PE=1 SV=2                                              | 0.01 |
| 14 | >Reverse >sp Q7Z745 HTRB2_HUMAN              | HEAT repeat-containing protein 7B2 OS=Homo sapiens GN=HEATR7B2 PE=2 SV=3                                | 0.01 |
| 15 | >sp P43251 BTD_HUMAN                         | Biotinidase OS=Homo sapiens GN=BTD PE=1 SV=2                                                            | 0.01 |
| 16 | >sp Q12912 LRMP_HUMAN                        | Lymphoid-restricted membrane protein OS=Homo sapiens GN=LRMP PE=1 SV=3                                  | 0.01 |
| 17 | >sp Q8WY91 THAP4_HUMAN                       | THAP domain-containing protein 4 OS=Homo sapiens GN=THAP4 PE=1 SV=2                                     | 0.01 |
| 18 | >sp K1C10_HUMAN (Common contaminant protein) |                                                                                                         | 0.01 |
| 19 | >sp K1C9_HUMAN (Common contaminant protein)  |                                                                                                         | 0.01 |
| 20 | >sp O94819 KBTBB_HUMAN                       | Kelch repeat and BTB domain-containing protein 11 OS=Homo sapiens GN=KBTBD11 PE=1 SV=1                  | 0.01 |
| 21 | >sp Q9Y6X2 PIAS3_HUMAN                       | E3 SUMO-protein ligase PIAS3 OS=Homo sapiens GN=PIAS3 PE=1 SV=2                                         | 0.01 |
| 22 | >sp P12111 CO6A3_HUMAN                       | Collagen alpha-3(VI) chain OS=Homo sapiens GN=COL6A3 PE=1 SV=5                                          | 0.01 |
| 23 | >sp P11021 GRP78_HUMAN                       | 78 kDa glucose-regulated protein OS=Homo sapiens GN=HSPA5 PE=1 SV=2                                     | 0.01 |
| 24 | >sp Q8WWI5 CTL1_HUMAN                        | Choline transporter-like protein 1 OS=Homo sapiens GN=SLC44A1 PE=1 SV=1                                 | 0.01 |
| 25 | >sp P23142-4 FBLN1_HUMAN                     | Isoform C of Fibulin-1 OS=Homo sapiens GN=FBLN1                                                         | 0.01 |
| 26 | >Reverse >sp O00461 GOLI4_HUMAN              | Golgi integral membrane protein 4 OS=Homo sapiens GN=GOLIM4 PE=1 SV=1                                   | 0.01 |
| 27 | >sp P02788 TRFL_HUMAN                        | Lactotransferrin OS=Homo sapiens GN=LTF PE=1 SV=6                                                       | 0.01 |
| 28 | >sp P48378 RFX2_HUMAN                        | DNA-binding protein RFX2 OS=Homo sapiens GN=RFX2 PE=2 SV=2                                              | 0.01 |
| 29 | >Reverse >sp P28331 NDUS1_HUMAN              | NADH-ubiquinone oxidoreductase 75 kDa subunit, mitochondrial OS=Homo sapiens GN=NDUFS1 PE=1 SV=3        | 0.01 |
| 30 | >sp P16070 CD44_HUMAN                        | CD44 antigen OS=Homo sapiens GN=CD44 PE=1 SV=3                                                          | 0.01 |
| 31 | >sp P54886 P5CS_HUMAN                        | Delta-1-pyrroline-5-carboxylate synthase OS=Homo sapiens GN=ALDH18A1 PE=1 SV=2                          | 0.01 |
| 32 | >Reverse >sp Q2NL82 TSR1_HUMAN               | Pre-rRNA-processing protein TSR1 homolog OS=Homo sapiens GN=TSR1 PE=1 SV=1                              | 0.01 |
| 33 | >sp P22735 TGM1_HUMAN                        | Protein-glutamine gamma-glutamyltransferase K OS=Homo sapiens GN=TGM1 PE=1 SV=4                         | 0.01 |
| 34 | >sp Q00610 CLH1_HUMAN                        | Clathrin heavy chain 1 OS=Homo sapiens GN=CLTC PE=1 SV=5                                                | 0.01 |
| 35 | >sp Q4KWH8 PLCH1_HUMAN                       | 1-phosphatidylinositol-4,5-bisphosphate phosphodiesterase                                               | 0.01 |
| 36 |                                              |                                                                                                         |      |
| 37 |                                              |                                                                                                         |      |
| 38 |                                              |                                                                                                         |      |
| 39 |                                              |                                                                                                         |      |
| 40 |                                              |                                                                                                         |      |
| 41 |                                              |                                                                                                         |      |
| 42 |                                              |                                                                                                         |      |
| 43 |                                              |                                                                                                         |      |
| 44 |                                              |                                                                                                         |      |
| 45 |                                              |                                                                                                         |      |
| 46 |                                              |                                                                                                         |      |
| 47 |                                              |                                                                                                         |      |
| 48 |                                              |                                                                                                         |      |
| 49 |                                              |                                                                                                         |      |
| 50 |                                              |                                                                                                         |      |
| 51 |                                              |                                                                                                         |      |
| 52 |                                              |                                                                                                         |      |
| 53 |                                              |                                                                                                         |      |
| 54 |                                              |                                                                                                         |      |
| 55 |                                              |                                                                                                         |      |
| 56 |                                              |                                                                                                         |      |
| 57 |                                              |                                                                                                         |      |
| 58 |                                              |                                                                                                         |      |
| 59 |                                              |                                                                                                         |      |
| 60 |                                              |                                                                                                         |      |

|    |                                                                                         |      |
|----|-----------------------------------------------------------------------------------------|------|
| 1  | eta-1 OS=Homo sapiens GN=PLCH1 PE=1 SV=1                                                |      |
| 2  | >sp P0C0L4 CO4A_HUMAN Complement C4-A OS=Homo sapiens GN=C4A PE=1 SV=1                  | 0.01 |
| 3  | >sp P21333 FLNA_HUMAN Filamin-A OS=Homo sapiens GN=FLNA PE=1 SV=4                       | 0.01 |
| 4  | >sp Q4LDE5 SVEP1_HUMAN Sushi, von Willebrand factor type A, EGF and pentraxin           | 0.01 |
| 5  | domain-containing protein 1 OS=Homo sapiens GN=SVEP1 PE=1 SV=3                          |      |
| 6  | >sp P35579 MYH9_HUMAN Myosin-9 OS=Homo sapiens GN=MYH9 PE=1 SV=4                        | 0.01 |
| 7  | >sp Q13608 PEX6_HUMAN Peroxisome assembly factor 2 OS=Homo sapiens GN=PEX6              | 0.01 |
| 8  | PE=1 SV=2                                                                               |      |
| 9  | >sp Q7Z2K8 GRIN1_HUMAN G protein-regulated inducer of neurite outgrowth 1 OS=Homo       | 0.01 |
| 10 | sapiens GN=GPRIN1 PE=1 SV=2                                                             |      |
| 11 | >sp Q9NSE4 SYIM_HUMAN Isoleucine--tRNA ligase, mitochondrial OS=Homo sapiens            | 0.01 |
| 12 | GN=IARS2 PE=1 SV=2                                                                      |      |
| 13 | >Reverse >sp Q9Y2M0 FAN1_HUMAN Fanconi-associated nuclease 1 OS=Homo sapiens            | 0.01 |
| 14 | GN=FAN1 PE=1 SV=4                                                                       |      |
| 15 | >sp P15924-2 DESP_HUMAN Isoform DPII of Desmoplakin OS=Homo sapiens GN=DSP              | 0.01 |
| 16 | >sp P02751-3 FINC_HUMAN Isoform 3 of Fibronectin OS=Homo sapiens GN=FN1                 | 0.01 |
| 17 | >sp Q13201 MMRN1_HUMAN Multimerin-1 OS=Homo sapiens GN=MMRN1 PE=1 SV=3                  | 0.01 |
| 18 | >sp Q8IZL8-2 PELP1_HUMAN Isoform 2 of Proline-, glutamic acid- and leucine-rich protein | 0.01 |
| 19 | 1 OS=Homo sapiens GN=PELP1                                                              |      |
| 20 | >Reverse >sp Q96C45 ULK4_HUMAN Serine/threonine-protein kinase ULK4 OS=Homo             | 0.01 |
| 21 | sapiens GN=ULK4 PE=2 SV=2                                                               |      |
| 22 | >sp Q8IV33 K0825_HUMAN Uncharacterized protein KIAA0825 OS=Homo sapiens                 | 0.01 |
| 23 | GN=KIAA0825 PE=2 SV=2                                                                   |      |
| 24 | >sp Q9HCH0 NCK5L_HUMAN Nck-associated protein 5-like OS=Homo sapiens                    | 0.01 |
| 25 | GN=NCKAP5L PE=1 SV=2                                                                    |      |
| 26 | >sp Q86YZ3 HORN_HUMAN Hornerin OS=Homo sapiens GN=HRNR PE=1 SV=2                        | 0.01 |
| 27 | >sp O14522 PTPRT_HUMAN Receptor-type tyrosine-protein phosphatase T OS=Homo             | 0.01 |
| 28 | sapiens GN=PTPRT PE=1 SV=6                                                              |      |

### Sample 3

|    | Description                                                                    | NpS<br>pC |
|----|--------------------------------------------------------------------------------|-----------|
| 34 | >sp P02647 APOA1_HUMAN Apolipoprotein A-I OS=Homo sapiens GN=APOA1 PE=1 SV=1   | 6.80      |
| 35 | >sp P02649 APOE_HUMAN Apolipoprotein E OS=Homo sapiens GN=APOE PE=1 SV=1       | 4.31      |
| 36 | >sp P0CG05 LAC2_HUMAN Ig lambda-2 chain C regions OS=Homo sapiens GN=IGLC2     | 3.44      |
| 37 | PE=1 SV=1                                                                      |           |
| 38 | >sp ALBU_HUMAN (Common contaminant protein)                                    | 3.13      |
| 39 | >sp P02654 APOC1_HUMAN Apolipoprotein C-I OS=Homo sapiens GN=APOC1 PE=1 SV=1   | 2.36      |
| 40 | >sp P55056 APOC4_HUMAN Apolipoprotein C-IV OS=Homo sapiens GN=APOC4 PE=1       | 2.15      |
| 41 | SV=1                                                                           |           |
| 42 | >sp P01834 IGKC_HUMAN Ig kappa chain C region OS=Homo sapiens GN=IGKC PE=1     | 1.85      |
| 43 | SV=1                                                                           |           |
| 44 | >sp P02652 APOA2_HUMAN Apolipoprotein A-II OS=Homo sapiens GN=APOA2 PE=1 SV=1  | 1.82      |
| 45 | >sp P01024 CO3_HUMAN Complement C3 OS=Homo sapiens GN=C3 PE=1 SV=2             | 1.75      |
| 46 | >sp P02656 APOC3_HUMAN Apolipoprotein C-III OS=Homo sapiens GN=APOC3 PE=1      | 1.56      |
| 47 | SV=1                                                                           |           |
| 48 | >sp P04114 APOB_HUMAN Apolipoprotein B-100 OS=Homo sapiens GN=APOB PE=1 SV=2   | 1.53      |
| 49 | >sp P02655 APOC2_HUMAN Apolipoprotein C-II OS=Homo sapiens GN=APOC2 PE=1 SV=1  | 1.53      |
| 50 | >sp P01876 IGHA1_HUMAN Ig alpha-1 chain C region OS=Homo sapiens GN=IGHA1 PE=1 | 1.31      |
| 51 | SV=2                                                                           |           |
| 52 | >sp P35542 SAA4_HUMAN Serum amyloid A-4 protein OS=Homo sapiens GN=SAA4 PE=1   | 1.13      |
| 53 | SV=2                                                                           |           |
| 54 | >sp P00738 HPT_HUMAN Haptoglobin OS=Homo sapiens GN=HP PE=1 SV=1               | 1.04      |
| 55 | >sp P01871-2 IGHM_HUMAN Isoform 2 of Ig mu chain C region OS=Homo sapiens      | 0.99      |



1  
2  
3  
4  
5  
6  
7  
8  
9  
10  
11  
12  
13  
14  
15  
16  
17  
18  
19  
20  
21  
22  
23  
24  
25  
26  
27  
28  
29  
30  
31  
32  
33  
34  
35  
36  
37  
38  
39  
40  
41  
42  
43  
44  
45  
46  
47  
48  
49  
50  
51  
52  
53  
54  
55  
56  
57  
58  
59  
60

| GN=IGHM                                                                                        |      |
|------------------------------------------------------------------------------------------------|------|
| >sp P06727 APOA4_HUMAN Apolipoprotein A-IV OS=Homo sapiens GN=APOA4 PE=1 SV=3                  | 0.99 |
| >sp P01009 A1AT_HUMAN Alpha-1-antitrypsin OS=Homo sapiens GN=SERPINA1 PE=1 SV=3                | 0.92 |
| >sp P02735 SAA_HUMAN Serum amyloid A protein OS=Homo sapiens GN=SAA1 PE=1 SV=2                 | 0.92 |
| >sp P02787 TRFE_HUMAN Serotransferrin OS=Homo sapiens GN=TF PE=1 SV=3                          | 0.88 |
| >sp P04004 VTNC_HUMAN Vitronectin OS=Homo sapiens GN=VTN PE=1 SV=1                             | 0.85 |
| >sp P01620 KV302_HUMAN Ig kappa chain V-III region SIE OS=Homo sapiens PE=1 SV=1               | 0.84 |
| >sp P02774 VTDB_HUMAN Vitamin D-binding protein OS=Homo sapiens GN=GC PE=1 SV=1                | 0.77 |
| >sp P04003 C4BPA_HUMAN C4b-binding protein alpha chain OS=Homo sapiens GN=C4BPA PE=1 SV=2      | 0.68 |
| >sp P05090 APOD_HUMAN Apolipoprotein D OS=Homo sapiens GN=APOD PE=1 SV=1                       | 0.67 |
| >sp P0C0L5 CO4B_HUMAN Complement C4-B OS=Homo sapiens GN=C4B PE=1 SV=1                         | 0.65 |
| >sp K2C1_HUMAN (Common contaminant protein)                                                    | 0.65 |
| >sp O14791 APOL1_HUMAN Apolipoprotein L1 OS=Homo sapiens GN=APOL1 PE=1 SV=5                    | 0.63 |
| >sp P01859 IGHG2_HUMAN Ig gamma-2 chain C region OS=Homo sapiens GN=IGHG2 PE=1 SV=2            | 0.62 |
| >sp O95445 APOM_HUMAN Apolipoprotein M OS=Homo sapiens GN=APOM PE=1 SV=2                       | 0.60 |
| >sp P02749 APOH_HUMAN Beta-2-glycoprotein 1 OS=Homo sapiens GN=APOH PE=1 SV=3                  | 0.59 |
| >sp P00734 THRB_HUMAN Prothrombin OS=Homo sapiens GN=F2 PE=1 SV=2                              | 0.59 |
| >sp P10909 CLUS_HUMAN Clusterin OS=Homo sapiens GN=CLU PE=1 SV=1                               | 0.58 |
| >sp P01591 IGJ_HUMAN Immunoglobulin J chain OS=Homo sapiens GN=IGJ PE=1 SV=4                   | 0.57 |
| >sp P02790 HEMO_HUMAN Hemopexin OS=Homo sapiens GN=HPX PE=1 SV=2                               | 0.55 |
| >sp P02760 AMBP_HUMAN Protein AMBP OS=Homo sapiens GN=AMBP PE=1 SV=1                           | 0.54 |
| >sp P02768 ALBU_HUMAN Serum albumin OS=Homo sapiens GN=ALB PE=1 SV=2                           | 0.53 |
| >sp P02768-2 ALBU_HUMAN Isoform 2 of Serum albumin OS=Homo sapiens GN=ALB                      | 0.52 |
| >sp P07360 CO8G_HUMAN Complement component C8 gamma chain OS=Homo sapiens GN=C8G PE=1 SV=3     | 0.52 |
| >sp P01023 A2MG_HUMAN Alpha-2-macroglobulin OS=Homo sapiens GN=A2M PE=1 SV=3                   | 0.52 |
| >sp P01008 ANT3_HUMAN Antithrombin-III OS=Homo sapiens GN=SERPINC1 PE=1 SV=1                   | 0.51 |
| >sp P69905 HBA_HUMAN Hemoglobin subunit alpha OS=Homo sapiens GN=HBA1 PE=1 SV=2                | 0.49 |
| >sp Q6Q788 APOA5_HUMAN Apolipoprotein A-V OS=Homo sapiens GN=APOA5 PE=1 SV=1                   | 0.48 |
| >sp A8MW06 TMSL3_HUMAN Thymosin beta-4-like protein 3 OS=Homo sapiens GN=TMSL3 PE=2 SV=1       | 0.48 |
| >sp P02766 TTHY_HUMAN Transthyretin OS=Homo sapiens GN=TTR PE=1 SV=1                           | 0.48 |
| >sp P27169 PON1_HUMAN Serum paraoxonase/arylesterase 1 OS=Homo sapiens GN=PON1 PE=1 SV=3       | 0.47 |
| >sp P01042 KNG1_HUMAN Kininogen-1 OS=Homo sapiens GN=KNG1 PE=1 SV=2                            | 0.46 |
| >sp Q9BXR6 FHR5_HUMAN Complement factor H-related protein 5 OS=Homo sapiens GN=CFHR5 PE=1 SV=1 | 0.46 |
| >sp P01861 IGHG4_HUMAN Ig gamma-4 chain C region OS=Homo sapiens GN=IGHG4 PE=1 SV=1            | 0.45 |
| >sp P01011 AACT_HUMAN Alpha-1-antichymotrypsin OS=Homo sapiens GN=SERPINA3 PE=1 SV=2           | 0.41 |
| >sp P49913 CAMP_HUMAN Cathelicidin antimicrobial peptide OS=Homo sapiens GN=CAMP PE=1 SV=1     | 0.41 |
| >sp P60709 ACTB_HUMAN Actin, cytoplasmic 1 OS=Homo sapiens GN=ACTB PE=1 SV=1                   | 0.41 |
| >sp P03952 KLKB1_HUMAN Plasma kallikrein OS=Homo sapiens GN=KLKB1 PE=1 SV=1                    | 0.41 |
| >sp P13671 CO6_HUMAN Complement component C6 OS=Homo sapiens GN=C6 PE=1 SV=3                   | 0.41 |

|                                                                                                        |      |
|--------------------------------------------------------------------------------------------------------|------|
| >sp O43866 CD5L_HUMAN CD5 antigen-like OS=Homo sapiens GN=CD5L PE=1 SV=1                               | 0.40 |
| >sp P00450 CERU_HUMAN Ceruloplasmin OS=Homo sapiens GN=CP PE=1 SV=1                                    | 0.39 |
| >sp P08603 CFAH_HUMAN Complement factor H OS=Homo sapiens GN=CFH PE=1 SV=4                             | 0.39 |
| >sp P04196 HRG_HUMAN Histidine-rich glycoprotein OS=Homo sapiens GN=HRG PE=1 SV=1                      | 0.39 |
| >sp P06396 GELS_HUMAN Gelsolin OS=Homo sapiens GN=GSN PE=1 SV=1                                        | 0.39 |
| >sp P07357 CO8A_HUMAN Complement component C8 alpha chain OS=Homo sapiens GN=C8A PE=1 SV=2             | 0.38 |
| >sp P02763 A1AG1_HUMAN Alpha-1-acid glycoprotein 1 OS=Homo sapiens GN=ORM1 PE=1 SV=1                   | 0.38 |
| >sp P68871 HBB_HUMAN Hemoglobin subunit beta OS=Homo sapiens GN=HBB PE=1 SV=2                          | 0.38 |
| >sp P02748 CO9_HUMAN Complement component C9 OS=Homo sapiens GN=C9 PE=1 SV=2                           | 0.38 |
| >sp P00751 CFAB_HUMAN Complement factor B OS=Homo sapiens GN=CFB PE=1 SV=2                             | 0.38 |
| >sp P27918 PROP_HUMAN Properdin OS=Homo sapiens GN=CFP PE=1 SV=2                                       | 0.37 |
| >sp P01625 KV402_HUMAN Ig kappa chain V-IV region Len OS=Homo sapiens PE=1 SV=2                        | 0.37 |
| >sp TRYP_PIG (Common contaminant protein)                                                              | 0.36 |
| >sp P02765 FETUA_HUMAN Alpha-2-HS-glycoprotein OS=Homo sapiens GN=AHSG PE=1 SV=1                       | 0.36 |
| >sp P01779 HV318_HUMAN Ig heavy chain V-III region TUR OS=Homo sapiens PE=1 SV=1                       | 0.36 |
| >sp Q8TDL5 BPIB1_HUMAN BPI fold-containing family B member 1 OS=Homo sapiens GN=BPIFB1 PE=2 SV=1       | 0.35 |
| >sp P22352 GPX3_HUMAN Glutathione peroxidase 3 OS=Homo sapiens GN=GPX3 PE=1 SV=2                       | 0.34 |
| >sp P18428 LBP_HUMAN Lipopolysaccharide-binding protein OS=Homo sapiens GN=LBP PE=1 SV=3               | 0.34 |
| >sp P00747 PLMN_HUMAN Plasminogen OS=Homo sapiens GN=PLG PE=1 SV=2                                     | 0.33 |
| >sp P10643 CO7_HUMAN Complement component C7 OS=Homo sapiens GN=C7 PE=1 SV=2                           | 0.32 |
| >sp Q14624 ITIH4_HUMAN Inter-alpha-trypsin inhibitor heavy chain H4 OS=Homo sapiens GN=ITIH4 PE=1 SV=4 | 0.32 |
| >sp P02753 RET4_HUMAN Retinol-binding protein 4 OS=Homo sapiens GN=RBP4 PE=1 SV=3                      | 0.31 |
| >sp P01031 CO5_HUMAN Complement C5 OS=Homo sapiens GN=C5 PE=1 SV=4                                     | 0.31 |
| >sp P07358 CO8B_HUMAN Complement component C8 beta chain OS=Homo sapiens GN=C8B PE=1 SV=3              | 0.31 |
| >sp P06702 S10A9_HUMAN Protein S100-A9 OS=Homo sapiens GN=S100A9 PE=1 SV=1                             | 0.31 |
| >sp A6NIZ1 RP1BL_HUMAN Ras-related protein Rap-1b-like protein OS=Homo sapiens PE=2 SV=1               | 0.30 |
| >sp P01781 HV320_HUMAN Ig heavy chain V-III region GAL OS=Homo sapiens PE=1 SV=1                       | 0.30 |
| >sp P01857 IGHG1_HUMAN Ig gamma-1 chain C region OS=Homo sapiens GN=IGHG1 PE=1 SV=1                    | 0.30 |
| >sp P19823 ITIH2_HUMAN Inter-alpha-trypsin inhibitor heavy chain H2 OS=Homo sapiens GN=ITIH2 PE=1 SV=2 | 0.30 |
| >sp P09871 C1S_HUMAN Complement C1s subcomponent OS=Homo sapiens GN=C1S PE=1 SV=1                      | 0.30 |
| >sp P05546 HEP2_HUMAN Heparin cofactor 2 OS=Homo sapiens GN=SERPIND1 PE=1 SV=3                         | 0.29 |
| >sp P63000 RAC1_HUMAN Ras-related C3 botulinum toxin substrate 1 OS=Homo sapiens GN=RAC1 PE=1 SV=1     | 0.29 |
| >sp P01766 HV305_HUMAN Ig heavy chain V-III region BRO OS=Homo sapiens PE=1 SV=1                       | 0.29 |
| >sp P19827 ITIH1_HUMAN Inter-alpha-trypsin inhibitor heavy chain H1 OS=Homo sapiens GN=ITIH1 PE=1 SV=3 | 0.28 |
| >sp P08571 CD14_HUMAN Monocyte differentiation antigen CD14 OS=Homo sapiens                            | 0.28 |

|    |                                                                                                                                           |             |
|----|-------------------------------------------------------------------------------------------------------------------------------------------|-------------|
| 1  |                                                                                                                                           |             |
| 2  |                                                                                                                                           |             |
| 3  |                                                                                                                                           |             |
| 4  | <b>GN=CD14 PE=1 SV=2</b>                                                                                                                  |             |
| 5  | <b>&gt;sp P62807 H2B1C_HUMAN Histone H2B type 1-C/E/F/G/I OS=Homo sapiens</b>                                                             | <b>0.28</b> |
| 6  | <b>GN=HIST1H2BC PE=1 SV=4</b>                                                                                                             |             |
| 7  | <b>&gt;sp P01772 HV311_HUMAN Ig heavy chain V-III region KOL OS=Homo sapiens PE=1 SV=1</b>                                                | <b>0.28</b> |
| 8  | <b>&gt;sp P05452 TETN_HUMAN Tetranectin OS=Homo sapiens GN=CLEC3B PE=1 SV=3</b>                                                           | <b>0.28</b> |
| 9  | <b>&gt;sp P10720 PF4V_HUMAN Platelet factor 4 variant OS=Homo sapiens GN=PF4V1 PE=1 SV=1</b>                                              | <b>0.27</b> |
| 10 | <b>&gt;sp P07225 PROS_HUMAN Vitamin K-dependent protein S OS=Homo sapiens GN=PROS1 PE=1 SV=1</b>                                          | <b>0.26</b> |
| 11 | <b>&gt;sp P20851 C4BPB_HUMAN C4b-binding protein beta chain OS=Homo sapiens GN=C4BPB PE=1 SV=1</b>                                        | <b>0.25</b> |
| 12 | <b>&gt;sp P01613 KV121_HUMAN Ig kappa chain V-I region Ni OS=Homo sapiens PE=1 SV=1</b>                                                   | <b>0.25</b> |
| 13 | <b>&gt;sp P02746 C1QB_HUMAN Complement C1q subcomponent subunit B OS=Homo sapiens GN=C1QB PE=1 SV=3</b>                                   | <b>0.25</b> |
| 14 | <b>&gt;sp P00736 C1R_HUMAN Complement C1r subcomponent OS=Homo sapiens GN=C1R PE=1 SV=2</b>                                               | <b>0.25</b> |
| 15 | <b>&gt;sp P19652 A1AG2_HUMAN Alpha-1-acid glycoprotein 2 OS=Homo sapiens GN=ORM2 PE=1 SV=2</b>                                            | <b>0.24</b> |
| 16 | <b>&gt;sp P11597 CETP_HUMAN Cholesteryl ester transfer protein OS=Homo sapiens GN=CETP PE=1 SV=2</b>                                      | <b>0.24</b> |
| 17 | <b>&gt;sp P01860 IGHG3_HUMAN Ig gamma-3 chain C region OS=Homo sapiens GN=IGHG3 PE=1 SV=2</b>                                             | <b>0.24</b> |
| 18 | <b>&gt;sp P00739 HPTR_HUMAN Haptoglobin-related protein OS=Homo sapiens GN=HPR PE=1 SV=2</b>                                              | <b>0.24</b> |
| 19 | <b>&gt;sp P01764 HV303_HUMAN Ig heavy chain V-III region VH26 OS=Homo sapiens PE=1 SV=1</b>                                               | <b>0.24</b> |
| 20 | <b>&gt;sp P00748 FA12_HUMAN Coagulation factor XII OS=Homo sapiens GN=F12 PE=1 SV=3</b>                                                   | <b>0.24</b> |
| 21 | <b>&gt;sp Q13790 APOF_HUMAN Apolipoprotein F OS=Homo sapiens GN=APOF PE=1 SV=2</b>                                                        | <b>0.24</b> |
| 22 | <b>&gt;sp P43652 AFAM_HUMAN Afamin OS=Homo sapiens GN=AFM PE=1 SV=1</b>                                                                   | <b>0.23</b> |
| 23 | <b>&gt;sp P04220 MUCB_HUMAN Ig mu heavy chain disease protein OS=Homo sapiens PE=1 SV=1</b>                                               | <b>0.23</b> |
| 24 | <b>&gt;sp P84077 ARF1_HUMAN ADP-ribosylation factor 1 OS=Homo sapiens GN=ARF1 PE=1 SV=2</b>                                               | <b>0.23</b> |
| 25 | <b>&gt;sp P35858 ALS_HUMAN Insulin-like growth factor-binding protein complex acid labile subunit OS=Homo sapiens GN=IGFALS PE=1 SV=1</b> | <b>0.23</b> |
| 26 | <b>&gt;sp Q96PD5 PGRP2_HUMAN N-acetylmuramoyl-L-alanine amidase OS=Homo sapiens GN=PGLYRP2 PE=1 SV=1</b>                                  | <b>0.23</b> |
| 27 | <b>&gt;sp B9A064 IGLL5_HUMAN Immunoglobulin lambda-like polypeptide 5 OS=Homo sapiens GN=IGLL5 PE=2 SV=2</b>                              | <b>0.23</b> |
| 28 | <b>&gt;sp P02745 C1QA_HUMAN Complement C1q subcomponent subunit A OS=Homo sapiens GN=C1QA PE=1 SV=2</b>                                   | <b>0.23</b> |
| 29 | <b>&gt;sp P05156 CFAI_HUMAN Complement factor I OS=Homo sapiens GN=CFI PE=1 SV=2</b>                                                      | <b>0.23</b> |
| 30 | <b>&gt;sp P01877 IGHA2_HUMAN Ig alpha-2 chain C region OS=Homo sapiens GN=IGHA2 PE=1 SV=3</b>                                             | <b>0.23</b> |
| 31 | <b>&gt;sp P59665 DEF1_HUMAN Neutrophil defensin 1 OS=Homo sapiens GN=DEFA1 PE=1 SV=1</b>                                                  | <b>0.22</b> |
| 32 | <b>&gt;sp P23142 FBLN1_HUMAN Fibulin-1 OS=Homo sapiens GN=FBLN1 PE=1 SV=4</b>                                                             | <b>0.22</b> |
| 33 | <b>&gt;sp Q03591 FHR1_HUMAN Complement factor H-related protein 1 OS=Homo sapiens GN=CFHR1 PE=1 SV=2</b>                                  | <b>0.21</b> |
| 34 | <b>&gt;sp P05155 IC1_HUMAN Plasma protease C1 inhibitor OS=Homo sapiens GN=SERPING1 PE=1 SV=2</b>                                         | <b>0.21</b> |
| 35 | <b>&gt;sp P01621 KV303_HUMAN Ig kappa chain V-III region NG9 (Fragment) OS=Homo sapiens PE=1 SV=1</b>                                     | <b>0.21</b> |
| 36 | <b>&gt;sp Q86UX7 URP2_HUMAN Fermitin family homolog 3 OS=Homo sapiens GN=FERMT3 PE=1 SV=1</b>                                             | <b>0.21</b> |
| 37 | <b>&gt;sp Q9UHG3 PCYOX_HUMAN Prenylcysteine oxidase 1 OS=Homo sapiens GN=PCYOX1 PE=1 SV=3</b>                                             | <b>0.21</b> |
| 38 |                                                                                                                                           |             |
| 39 |                                                                                                                                           |             |
| 40 |                                                                                                                                           |             |
| 41 |                                                                                                                                           |             |
| 42 |                                                                                                                                           |             |
| 43 |                                                                                                                                           |             |
| 44 |                                                                                                                                           |             |
| 45 |                                                                                                                                           |             |
| 46 |                                                                                                                                           |             |
| 47 |                                                                                                                                           |             |
| 48 |                                                                                                                                           |             |
| 49 |                                                                                                                                           |             |
| 50 |                                                                                                                                           |             |
| 51 |                                                                                                                                           |             |
| 52 |                                                                                                                                           |             |
| 53 |                                                                                                                                           |             |
| 54 |                                                                                                                                           |             |
| 55 |                                                                                                                                           |             |
| 56 |                                                                                                                                           |             |
| 57 |                                                                                                                                           |             |
| 58 |                                                                                                                                           |             |
| 59 |                                                                                                                                           |             |
| 60 |                                                                                                                                           |             |

|                                                                                                                   |      |
|-------------------------------------------------------------------------------------------------------------------|------|
| >sp Q86SG5 S1A7A_HUMAN Protein S100-A7A OS=Homo sapiens GN=S100A7A PE=2 SV=3                                      | 0.21 |
| >sp P08185 CBG_HUMAN Corticosteroid-binding globulin OS=Homo sapiens GN=SERPINA6 PE=1 SV=1                        | 0.21 |
| >sp P01880 IGHD_HUMAN Ig delta chain C region OS=Homo sapiens GN=IGHD PE=1 SV=2                                   | 0.20 |
| >sp P10599 THIO_HUMAN Thioredoxin OS=Homo sapiens GN=TXN PE=1 SV=3                                                | 0.20 |
| >sp P08697 A2AP_HUMAN Alpha-2-antiplasmin OS=Homo sapiens GN=SERPINF2 PE=1 SV=3                                   | 0.20 |
| >sp P04899 GNAI2_HUMAN Guanine nucleotide-binding protein G(i) subunit alpha-2 OS=Homo sapiens GN=GNAI2 PE=1 SV=3 | 0.20 |
| >sp ALBU_BOVIN (Common contaminant protein)                                                                       | 0.20 |
| >sp P01593 KV101_HUMAN Ig kappa chain V-I region AG OS=Homo sapiens PE=1 SV=1                                     | 0.19 |
| >sp P01598 KV106_HUMAN Ig kappa chain V-I region EU OS=Homo sapiens PE=1 SV=1                                     | 0.19 |
| >sp P01714 LV301_HUMAN Ig lambda chain V-III region SH OS=Homo sapiens PE=1 SV=1                                  | 0.19 |
| >sp P01624 KV306_HUMAN Ig kappa chain V-III region POM OS=Homo sapiens PE=1 SV=1                                  | 0.19 |
| >sp P12273 PIP_HUMAN Prolactin-inducible protein OS=Homo sapiens GN=PIP PE=1 SV=1                                 | 0.19 |
| >sp P02042 HBD_HUMAN Hemoglobin subunit delta OS=Homo sapiens GN=HBD PE=1 SV=2                                    | 0.19 |
| >sp P03950 ANGI_HUMAN Angiogenin OS=Homo sapiens GN=ANG PE=1 SV=1                                                 | 0.19 |
| >sp P80748 LV302_HUMAN Ig lambda chain V-III region LOI OS=Homo sapiens PE=1 SV=1                                 | 0.19 |
| >sp P04406 G3P_HUMAN Glyceraldehyde-3-phosphate dehydrogenase OS=Homo sapiens GN=GAPDH PE=1 SV=3                  | 0.19 |
| >sp P01019 ANGT_HUMAN Angiotensinogen OS=Homo sapiens GN=AGT PE=1 SV=1                                            | 0.19 |
| >sp P01617 KV204_HUMAN Ig kappa chain V-II region TEW OS=Homo sapiens PE=1 SV=1                                   | 0.19 |
| >sp P55058 PLTP_HUMAN Phospholipid transfer protein OS=Homo sapiens GN=PLTP PE=1 SV=1                             | 0.18 |
| >sp P01767 HV306_HUMAN Ig heavy chain V-III region BUT OS=Homo sapiens PE=1 SV=1                                  | 0.18 |
| >sp P26038 MOES_HUMAN Moesin OS=Homo sapiens GN=MSN PE=1 SV=3                                                     | 0.18 |
| >sp P29622 KAIN_HUMAN Kallistatin OS=Homo sapiens GN=SERPINA4 PE=1 SV=3                                           | 0.18 |
| >sp P61769 B2MG_HUMAN Beta-2-microglobulin OS=Homo sapiens GN=B2M PE=1 SV=1                                       | 0.18 |
| >sp P02747 C1QC_HUMAN Complement C1q subcomponent subunit C OS=Homo sapiens GN=C1QC PE=1 SV=3                     | 0.17 |
| >sp P05164-3 PERM_HUMAN Isoform H7 of Myeloperoxidase OS=Homo sapiens GN=MPO                                      | 0.17 |
| >sp P49908 SEPP1_HUMAN Selenoprotein P OS=Homo sapiens GN=SEPP1 PE=1 SV=3                                         | 0.17 |
| >sp P25311 ZA2G_HUMAN Zinc-alpha-2-glycoprotein OS=Homo sapiens GN=AZGP1 PE=1 SV=2                                | 0.16 |
| >sp P62491 RB11A_HUMAN Ras-related protein Rab-11A OS=Homo sapiens GN=RAB11A PE=1 SV=3                            | 0.16 |
| >sp P20671 H2A1D_HUMAN Histone H2A type 1-D OS=Homo sapiens GN=HIST1H2AD PE=1 SV=2                                | 0.16 |
| >sp P04217 A1BG_HUMAN Alpha-1B-glycoprotein OS=Homo sapiens GN=A1BG PE=1 SV=4                                     | 0.16 |
| >sp P05543 THBG_HUMAN Thyroxine-binding globulin OS=Homo sapiens GN=SERPINA7 PE=1 SV=2                            | 0.15 |
| >sp K1H1_HUMAN (Common contaminant protein)                                                                       | 0.15 |
| >sp P05109 S10A8_HUMAN Protein S100-A8 OS=Homo sapiens GN=S100A8 PE=1 SV=1                                        | 0.15 |
| >sp P07737 PROF1_HUMAN Profilin-1 OS=Homo sapiens GN=PFN1 PE=1 SV=2                                               | 0.15 |
| >sp P07996 TSP1_HUMAN Thrombospondin-1 OS=Homo sapiens GN=THBS1 PE=1 SV=2                                         | 0.15 |
| >sp P08514 ITA2B_HUMAN Integrin alpha-IIb OS=Homo sapiens GN=ITGA2B PE=1 SV=3                                     | 0.15 |
| >sp P01042-2 KNG1_HUMAN Isoform LMW of Kininogen-1 OS=Homo sapiens GN=KNG1                                        | 0.15 |
| >sp O00299 CLIC1_HUMAN Chloride intracellular channel protein 1 OS=Homo sapiens GN=CLIC1 PE=1 SV=4                | 0.15 |
| >sp P12259 FA5_HUMAN Coagulation factor V OS=Homo sapiens GN=F5 PE=1 SV=4                                         | 0.14 |
| >sp Q9NZT1 CALL5_HUMAN Calmodulin-like protein 5 OS=Homo sapiens GN=CALML5 PE=1 SV=2                              | 0.14 |

|    |                                                                                     |      |  |
|----|-------------------------------------------------------------------------------------|------|--|
| 1  |                                                                                     |      |  |
| 2  |                                                                                     |      |  |
| 3  | >sp Q9UK55 ZPI_HUMAN Protein Z-dependent protease inhibitor OS=Homo sapiens         | 0.14 |  |
| 4  | GN=SERPINA10 PE=1 SV=1                                                              |      |  |
| 5  | >sp P02750 A2GL_HUMAN Leucine-rich alpha-2-glycoprotein OS=Homo sapiens GN=LRG1     | 0.14 |  |
| 6  | PE=1 SV=2                                                                           |      |  |
| 7  | >sp P08519 APOA_HUMAN Apolipoprotein(a) OS=Homo sapiens GN=LPA PE=1 SV=1            | 0.14 |  |
| 8  | >sp P06681 CO2_HUMAN Complement C2 OS=Homo sapiens GN=C2 PE=1 SV=2                  | 0.14 |  |
| 9  | >sp P02786 TFR1_HUMAN Transferrin receptor protein 1 OS=Homo sapiens GN=TFRC        | 0.14 |  |
| 10 | PE=1 SV=2                                                                           |      |  |
| 11 | >sp Q9Y5C1 ANGL3_HUMAN Angiopoietin-related protein 3 OS=Homo sapiens               | 0.14 |  |
| 12 | GN=ANGPTL3 PE=1 SV=1                                                                |      |  |
| 13 | >sp Q96QR1 SG3A1_HUMAN Secretoglobin family 3A member 1 OS=Homo sapiens             | 0.13 |  |
| 14 | GN=SCGB3A1 PE=1 SV=2                                                                |      |  |
| 15 | >sp P36955 PEDF_HUMAN Pigment epithelium-derived factor OS=Homo sapiens             | 0.13 |  |
| 16 | GN=SERPINF1 PE=1 SV=4                                                               |      |  |
| 17 | >sp Q06033 ITIH3_HUMAN Inter-alpha-trypsin inhibitor heavy chain H3 OS=Homo sapiens | 0.13 |  |
| 18 | GN=ITIH3 PE=1 SV=2                                                                  |      |  |
| 19 | >sp Q96IY4 CBPB2_HUMAN Carboxypeptidase B2 OS=Homo sapiens GN=CPB2 PE=1             | 0.13 |  |
| 20 | SV=2                                                                                |      |  |
| 21 | >sp P04430 KV122_HUMAN Ig kappa chain V-I region BAN OS=Homo sapiens PE=1 SV=1      | 0.13 |  |
| 22 | >sp P01597 KV105_HUMAN Ig kappa chain V-I region DEE OS=Homo sapiens PE=1 SV=1      | 0.13 |  |
| 23 | >sp P00742 FA10_HUMAN Coagulation factor X OS=Homo sapiens GN=F10 PE=1 SV=2         | 0.13 |  |
| 24 | >sp P04208 LV106_HUMAN Ig lambda chain V-I region WAH OS=Homo sapiens PE=1 SV=1     | 0.13 |  |
| 25 | >sp P81605 DCD_HUMAN Dermcidin OS=Homo sapiens GN=DCD PE=1 SV=2                     | 0.13 |  |
| 26 | >sp Q92496 FHR4_HUMAN Complement factor H-related protein 4 OS=Homo sapiens         | 0.13 |  |
| 27 | GN=CFHR4 PE=1 SV=2                                                                  |      |  |
| 28 | >sp P23528 COF1_HUMAN Cofilin-1 OS=Homo sapiens GN=CFL1 PE=1 SV=3                   | 0.13 |  |
| 29 | >sp P06318 LV604_HUMAN Ig lambda chain V-VI region WLT OS=Homo sapiens PE=1 SV=1    | 0.13 |  |
| 30 | >sp P05106-2 ITB3_HUMAN Isoform Beta-3B of Integrin beta-3 OS=Homo sapiens          | 0.13 |  |
| 31 | GN=ITGB3                                                                            |      |  |
| 32 | >sp P02743 SAMP_HUMAN Serum amyloid P-component OS=Homo sapiens GN=APCS             | 0.13 |  |
| 33 | PE=1 SV=2                                                                           |      |  |
| 34 | >sp Q96KN2 CNDP1_HUMAN Beta-Ala-His dipeptidase OS=Homo sapiens GN=CNDP1            | 0.12 |  |
| 35 | PE=1 SV=4                                                                           |      |  |
| 36 | >sp P51884 LUM_HUMAN Lumican OS=Homo sapiens GN=LUM PE=1 SV=2                       | 0.12 |  |
| 37 | >sp P14923 PLAK_HUMAN Junction plakoglobin OS=Homo sapiens GN=JUP PE=1 SV=3         | 0.12 |  |
| 38 | >sp P04433 KV309_HUMAN Ig kappa chain V-III region VG (Fragment) OS=Homo sapiens    | 0.12 |  |
| 39 | PE=1 SV=1                                                                           |      |  |
| 40 | >sp P01765 HV304_HUMAN Ig heavy chain V-III region TIL OS=Homo sapiens PE=1 SV=1    | 0.12 |  |
| 41 | >sp P17936 IBP3_HUMAN Insulin-like growth factor-binding protein 3 OS=Homo sapiens  | 0.12 |  |
| 42 | GN=IGFBP3 PE=1 SV=2                                                                 |      |  |
| 43 | >sp P23083 HV103_HUMAN Ig heavy chain V-I region V35 OS=Homo sapiens PE=1 SV=1      | 0.12 |  |
| 44 | >sp P22792 CPN2_HUMAN Carboxypeptidase N subunit 2 OS=Homo sapiens GN=CPN2          | 0.12 |  |
| 45 | PE=1 SV=3                                                                           |      |  |
| 46 | >sp P36980-2 FHR2_HUMAN Isoform Short of Complement factor H-related protein 2      | 0.12 |  |
| 47 | OS=Homo sapiens GN=CFHR2                                                            |      |  |
| 48 | >sp P03951 FA11_HUMAN Coagulation factor XI OS=Homo sapiens GN=F11 PE=1 SV=1        | 0.11 |  |
| 49 | >sp Q9Y490 TLN1_HUMAN Talin-1 OS=Homo sapiens GN=TLN1 PE=1 SV=3                     | 0.11 |  |
| 50 | >sp P61586 RHOA_HUMAN Transforming protein RhoA OS=Homo sapiens GN=RHOA             | 0.11 |  |
| 51 | PE=1 SV=1                                                                           |      |  |
| 52 | >sp Q9NR31 SAR1A_HUMAN GTP-binding protein SAR1a OS=Homo sapiens GN=SAR1A           | 0.11 |  |
| 53 | PE=1 SV=1                                                                           |      |  |
| 54 | >sp P14618 KPYM_HUMAN Pyruvate kinase isozymes M1/M2 OS=Homo sapiens GN=PKM2        | 0.11 |  |
| 55 | PE=1 SV=4                                                                           |      |  |
| 56 | >sp P06310 KV206_HUMAN Ig kappa chain V-II region RPMI 6410 OS=Homo sapiens PE=4    | 0.11 |  |
| 57 | SV=1                                                                                |      |  |

|    |                                                                                                                        |
|----|------------------------------------------------------------------------------------------------------------------------|
| 1  |                                                                                                                        |
| 2  |                                                                                                                        |
| 3  | >sp P16671 CD36_HUMAN Platelet glycoprotein 4 OS=Homo sapiens GN=CD36 PE=1 SV=2 0.10                                   |
| 4  | >sp Q9HDC9 APMAP_HUMAN Adipocyte plasma membrane-associated protein OS=Homo sapiens GN=APMAP PE=1 SV=2 0.10            |
| 5  |                                                                                                                        |
| 6  | >sp P00558 PGK1_HUMAN Phosphoglycerate kinase 1 OS=Homo sapiens GN=PGK1 PE=1 SV=3 0.10                                 |
| 7  |                                                                                                                        |
| 8  | >sp Q9NZP8 C1RL_HUMAN Complement C1r subcomponent-like protein OS=Homo sapiens GN=C1RL PE=1 SV=2 0.10                  |
| 9  |                                                                                                                        |
| 10 | >sp Q14520 HABP2_HUMAN Hyaluronan-binding protein 2 OS=Homo sapiens GN=HABP2 PE=1 SV=1 0.10                            |
| 11 |                                                                                                                        |
| 12 | >sp Q8WUA8 TSK_HUMAN Tsukushin OS=Homo sapiens GN=TSKU PE=2 SV=3 0.10                                                  |
| 13 | >sp P27105 STOM_HUMAN Erythrocyte band 7 integral membrane protein OS=Homo sapiens GN=STOM PE=1 SV=3 0.10              |
| 14 |                                                                                                                        |
| 15 | >sp P06331 HV209_HUMAN Ig heavy chain V-II region ARH-77 OS=Homo sapiens PE=4 SV=1 0.10                                |
| 16 |                                                                                                                        |
| 17 | >sp P04180 LCAT_HUMAN Phosphatidylcholine-sterol acyltransferase OS=Homo sapiens GN=LCAT PE=1 SV=1 0.10                |
| 18 |                                                                                                                        |
| 19 | >sp Q9BYJ0 FGFP2_HUMAN Fibroblast growth factor-binding protein 2 OS=Homo sapiens GN=FGFBP2 PE=1 SV=1 0.09             |
| 20 |                                                                                                                        |
| 21 | >sp P02741 CRP_HUMAN C-reactive protein OS=Homo sapiens GN=CRP PE=1 SV=1 0.09                                          |
| 22 | >sp O75636 FCN3_HUMAN Ficolin-3 OS=Homo sapiens GN=FCN3 PE=1 SV=2 0.09                                                 |
| 23 | >sp P35247 SFTPD_HUMAN Pulmonary surfactant-associated protein D OS=Homo sapiens GN=SFTPD PE=1 SV=3 0.09               |
| 24 |                                                                                                                        |
| 25 | >sp P21926 CD9_HUMAN CD9 antigen OS=Homo sapiens GN=CD9 PE=1 SV=4 0.09                                                 |
| 26 | >sp P00740 FA9_HUMAN Coagulation factor IX OS=Homo sapiens GN=F9 PE=1 SV=2 0.09                                        |
| 27 | >sp Q15485 FCN2_HUMAN Ficolin-2 OS=Homo sapiens GN=FCN2 PE=1 SV=2 0.09                                                 |
| 28 | >sp P02751 FINC_HUMAN Fibronectin OS=Homo sapiens GN=FN1 PE=1 SV=4 0.09                                                |
| 29 | >sp P04278 SHBG_HUMAN Sex hormone-binding globulin OS=Homo sapiens GN=SHBG PE=1 SV=2 0.09                              |
| 30 |                                                                                                                        |
| 31 | >sp P05089 ARG1_HUMAN Arginase-1 OS=Homo sapiens GN=ARG1 PE=1 SV=2 0.09                                                |
| 32 | >sp P12814 ACTN1_HUMAN Alpha-actinin-1 OS=Homo sapiens GN=ACTN1 PE=1 SV=2 0.09                                         |
| 33 | >sp P63104 1433Z_HUMAN 14-3-3 protein zeta/delta OS=Homo sapiens GN=YWHAZ PE=1 SV=1 0.09                               |
| 34 |                                                                                                                        |
| 35 | >sp P80108 PHLD_HUMAN Phosphatidylinositol-glycan-specific phospholipase D OS=Homo sapiens GN=GPLD1 PE=1 SV=3 0.08     |
| 36 |                                                                                                                        |
| 37 | >sp P08567 PLEK_HUMAN Pleckstrin OS=Homo sapiens GN=PLEK PE=1 SV=3 0.08                                                |
| 38 | >sp P14770 GPIX_HUMAN Platelet glycoprotein IX OS=Homo sapiens GN=GP9 PE=1 SV=3 0.08                                   |
| 39 | >sp P04632 CPNS1_HUMAN Calpain small subunit 1 OS=Homo sapiens GN=CAPNS1 PE=1 SV=1 0.08                                |
| 40 |                                                                                                                        |
| 41 | >sp P23229-2 ITA6_HUMAN Isoform Alpha-6X1A of Integrin alpha-6 OS=Homo sapiens GN=ITGA6 0.08                           |
| 42 |                                                                                                                        |
| 43 | >sp P08603-2 CFAH_HUMAN Isoform 2 of Complement factor H OS=Homo sapiens GN=CFH 0.08                                   |
| 44 |                                                                                                                        |
| 45 | >sp Q13418 ILK_HUMAN Integrin-linked protein kinase OS=Homo sapiens GN=ILK PE=1 SV=2 0.08                              |
| 46 |                                                                                                                        |
| 47 | >sp P10314 1A32_HUMAN HLA class I histocompatibility antigen, A-32 alpha chain OS=Homo sapiens GN=HLA-A PE=2 SV=2 0.08 |
| 48 |                                                                                                                        |
| 49 | >sp P61225 RAP2B_HUMAN Ras-related protein Rap-2b OS=Homo sapiens GN=RAP2B PE=1 SV=1 0.08                              |
| 50 |                                                                                                                        |
| 51 | >sp P15169 CBPN_HUMAN Carboxypeptidase N catalytic chain OS=Homo sapiens GN=CPN1 PE=1 SV=1 0.08                        |
| 52 |                                                                                                                        |
| 53 | >sp Q9UGM5 FETUB_HUMAN Fetuin-B OS=Homo sapiens GN=FETUB PE=1 SV=2 0.07                                                |
| 54 | >Reverse >sp O95498-3 VNN2_HUMAN Isoform 3 of Vascular non-inflammatory molecule 2 OS=Homo sapiens GN=VNN2 0.07        |
| 55 |                                                                                                                        |
| 56 | >sp Q96CV9 OPTN_HUMAN Optineurin OS=Homo sapiens GN=OPTN PE=1 SV=2 0.07                                                |
| 57 | >sp Q9BX93 PG12B_HUMAN Group XIIB secretory phospholipase A2-like protein 0.07                                         |
| 58 |                                                                                                                        |
| 59 |                                                                                                                        |
| 60 |                                                                                                                        |

|    |                                 |                                                                                         |      |
|----|---------------------------------|-----------------------------------------------------------------------------------------|------|
| 1  |                                 |                                                                                         |      |
| 2  |                                 |                                                                                         |      |
| 3  |                                 | <b>OS=Homo sapiens GN=PLA2G12B PE=1 SV=2</b>                                            |      |
| 4  | >sp P02675 FIBB_HUMAN           | Fibrinogen beta chain OS=Homo sapiens GN=FGB PE=1 SV=2                                  | 0.07 |
| 5  | >sp P32119 PRDX2_HUMAN          | Peroxiredoxin-2 OS=Homo sapiens GN=PRDX2 PE=1 SV=5                                      | 0.07 |
| 6  | >sp Q92954 PRG4_HUMAN           | Proteoglycan 4 OS=Homo sapiens GN=PRG4 PE=1 SV=2                                        | 0.07 |
| 7  | >sp P02776 PLF4_HUMAN           | Platelet factor 4 OS=Homo sapiens GN=PF4 PE=1 SV=2                                      | 0.07 |
| 8  | >sp P31151 S10A7_HUMAN          | Protein S100-A7 OS=Homo sapiens GN=S100A7 PE=1 SV=4                                     | 0.07 |
| 9  | >sp P07384 CAN1_HUMAN           | Calpain-1 catalytic subunit OS=Homo sapiens GN=CAPN1 PE=1 SV=1                          | 0.07 |
| 10 | >sp P01703 LV105_HUMAN          | Ig lambda chain V-I region NEWM OS=Homo sapiens PE=1 SV=1                               | 0.07 |
| 11 | >sp P62805 H4_HUMAN             | Histone H4 OS=Homo sapiens GN=HIST1H4A PE=1 SV=2                                        | 0.07 |
| 12 | >sp Q07954 LRP1_HUMAN           | Prolow-density lipoprotein receptor-related protein 1 OS=Homo sapiens GN=LRP1 PE=1 SV=2 | 0.07 |
| 13 | >sp P61006 RAB8A_HUMAN          | Ras-related protein Rab-8A OS=Homo sapiens GN=RAB8A PE=1 SV=1                           | 0.07 |
| 14 | >sp O00391 QSOX1_HUMAN          | Sulfhydryl oxidase 1 OS=Homo sapiens GN=QSOX1 PE=1 SV=3                                 | 0.07 |
| 15 | >sp P00451 FA8_HUMAN            | Coagulation factor VIII OS=Homo sapiens GN=F8 PE=1 SV=1                                 | 0.07 |
| 16 | >sp P01717 LV403_HUMAN          | Ig lambda chain V-IV region Hil OS=Homo sapiens PE=1 SV=1                               | 0.07 |
| 17 | >sp P01611 KV119_HUMAN          | Ig kappa chain V-I region Wes OS=Homo sapiens PE=1 SV=1                                 | 0.06 |
| 18 | >sp P01610 KV118_HUMAN          | Ig kappa chain V-I region WEA OS=Homo sapiens PE=1 SV=1                                 | 0.06 |
| 19 | >sp P01605 KV113_HUMAN          | Ig kappa chain V-I region Lay OS=Homo sapiens PE=1 SV=1                                 | 0.06 |
| 20 | >sp P01604 KV112_HUMAN          | Ig kappa chain V-I region Kue OS=Homo sapiens PE=1 SV=1                                 | 0.06 |
| 21 | >sp P04206 KV307_HUMAN          | Ig kappa chain V-III region GOL OS=Homo sapiens PE=1 SV=1                               | 0.06 |
| 22 | >sp P01612 KV120_HUMAN          | Ig kappa chain V-I region Mev OS=Homo sapiens PE=1 SV=1                                 | 0.06 |
| 23 | >sp P01622 KV304_HUMAN          | Ig kappa chain V-III region Ti OS=Homo sapiens PE=1 SV=1                                | 0.06 |
| 24 | >sp P01702 LV104_HUMAN          | Ig lambda chain V-I region NIG-64 OS=Homo sapiens PE=1 SV=1                             | 0.06 |
| 25 | >sp P01699 LV101_HUMAN          | Ig lambda chain V-I region VOR OS=Homo sapiens PE=1 SV=1                                | 0.06 |
| 26 | >sp P01616 KV203_HUMAN          | Ig kappa chain V-II region MIL OS=Homo sapiens PE=1 SV=1                                | 0.06 |
| 27 | >sp P01871 IGHM_HUMAN           | Ig mu chain C region OS=Homo sapiens GN=IGHM PE=1 SV=3                                  | 0.06 |
| 28 | >sp P07355 ANXA2_HUMAN          | Annexin A2 OS=Homo sapiens GN=ANXA2 PE=1 SV=2                                           | 0.06 |
| 29 | >sp P05556 ITB1_HUMAN           | Integrin beta-1 OS=Homo sapiens GN=ITGB1 PE=1 SV=2                                      | 0.06 |
| 30 | >sp P01763 HV302_HUMAN          | Ig heavy chain V-III region WEA OS=Homo sapiens PE=1 SV=1                               | 0.06 |
| 31 | >sp P01614 KV201_HUMAN          | Ig kappa chain V-II region Cum OS=Homo sapiens PE=1 SV=1                                | 0.06 |
| 32 | >sp P01780 HV319_HUMAN          | Ig heavy chain V-III region JON OS=Homo sapiens PE=1 SV=1                               | 0.06 |
| 33 | >sp P04070 PROC_HUMAN           | Vitamin K-dependent protein C OS=Homo sapiens GN=PROC PE=1 SV=1                         | 0.06 |
| 34 | >sp P04434 KV310_HUMAN          | Ig kappa chain V-III region VH (Fragment) OS=Homo sapiens PE=4 SV=1                     | 0.06 |
| 35 | >sp Q08380 LG3BP_HUMAN          | Galectin-3-binding protein OS=Homo sapiens GN=LGALS3BP PE=1 SV=1                        | 0.06 |
| 36 | >sp P04211 LV001_HUMAN          | Ig lambda chain V region 4A OS=Homo sapiens PE=4 SV=1                                   | 0.06 |
| 37 | >sp P01602 KV110_HUMAN          | Ig kappa chain V-I region HK102 (Fragment) OS=Homo sapiens GN=IGKV1-5 PE=4 SV=1         | 0.06 |
| 38 | >sp Q15166 PON3_HUMAN           | Serum paraoxonase/lactonase 3 OS=Homo sapiens GN=PON3 PE=1 SV=3                         | 0.06 |
| 39 | >sp P60033 CD81_HUMAN           | CD81 antigen OS=Homo sapiens GN=CD81 PE=1 SV=1                                          | 0.06 |
| 40 | >sp Q8TAQ9 SUN3_HUMAN           | SUN domain-containing protein 3 OS=Homo sapiens GN=SUN3 PE=2 SV=4                       | 0.06 |
| 41 | >sp P01815 HV202_HUMAN          | Ig heavy chain V-II region COR OS=Homo sapiens PE=1 SV=1                                | 0.06 |
| 42 | >sp P31944 CASPE_HUMAN          | Caspase-14 OS=Homo sapiens GN=CASP14 PE=1 SV=2                                          | 0.06 |
| 43 | >sp P01771 HV310_HUMAN          | Ig heavy chain V-III region HIL OS=Homo sapiens PE=1 SV=1                               | 0.06 |
| 44 | >Reverse >sp A6NGB0 T191C_HUMAN | Transmembrane protein 191C OS=Homo sapiens                                              | 0.06 |
| 45 |                                 |                                                                                         |      |
| 46 |                                 |                                                                                         |      |
| 47 |                                 |                                                                                         |      |
| 48 |                                 |                                                                                         |      |
| 49 |                                 |                                                                                         |      |
| 50 |                                 |                                                                                         |      |
| 51 |                                 |                                                                                         |      |
| 52 |                                 |                                                                                         |      |
| 53 |                                 |                                                                                         |      |
| 54 |                                 |                                                                                         |      |
| 55 |                                 |                                                                                         |      |
| 56 |                                 |                                                                                         |      |
| 57 |                                 |                                                                                         |      |
| 58 |                                 |                                                                                         |      |
| 59 |                                 |                                                                                         |      |
| 60 |                                 |                                                                                         |      |

|    |                     |                                                                                                                       |      |
|----|---------------------|-----------------------------------------------------------------------------------------------------------------------|------|
| 1  |                     |                                                                                                                       |      |
| 2  |                     |                                                                                                                       |      |
| 3  |                     |                                                                                                                       |      |
| 4  |                     | <b>GN=TMEM191C PE=2 SV=1</b>                                                                                          |      |
| 5  | >sp Q9P1T7          | <b>MDFIC_HUMAN MyoD family inhibitor domain-containing protein OS=Homo sapiens GN=MDFIC PE=1 SV=2</b>                 | 0.06 |
| 6  | >sp P02671          | <b>FIBA_HUMAN Fibrinogen alpha chain OS=Homo sapiens GN=FGA PE=1 SV=2</b>                                             | 0.06 |
| 7  | >sp P14151          | <b>LYAM1_HUMAN L-selectin OS=Homo sapiens GN=SELL PE=1 SV=2</b>                                                       | 0.06 |
| 8  | >sp P11226          | <b>MBL2_HUMAN Mannose-binding protein C OS=Homo sapiens GN=MBL2 PE=1 SV=2</b>                                         | 0.06 |
| 9  |                     |                                                                                                                       |      |
| 10 | >Reverse >sp Q6B9Z1 | <b>IGFL4_HUMAN Insulin growth factor-like family member 4 OS=Homo sapiens GN=IGFL4 PE=2 SV=1</b>                      | 0.06 |
| 11 | >sp P68032          | <b>ACTC_HUMAN Actin, alpha cardiac muscle 1 OS=Homo sapiens GN=ACTC1 PE=1 SV=1</b>                                    | 0.06 |
| 12 |                     |                                                                                                                       |      |
| 13 | >sp P01833          | <b>PIGR_HUMAN Polymeric immunoglobulin receptor OS=Homo sapiens GN=PIGR PE=1 SV=4</b>                                 | 0.06 |
| 14 |                     |                                                                                                                       |      |
| 15 | >sp Q9NP55          | <b>BPIA1_HUMAN BPI fold-containing family A member 1 OS=Homo sapiens GN=BPIFA1 PE=1 SV=1</b>                          | 0.05 |
| 16 |                     |                                                                                                                       |      |
| 17 | >sp P06311          | <b>KV311_HUMAN Ig kappa chain V-III region IARC/BL41 OS=Homo sapiens PE=1 SV=1</b>                                    | 0.05 |
| 18 |                     |                                                                                                                       |      |
| 19 | >sp P18135          | <b>KV312_HUMAN Ig kappa chain V-III region HAH OS=Homo sapiens PE=2 SV=1</b>                                          | 0.05 |
| 20 | >sp Q04756          | <b>HGFA_HUMAN Hepatocyte growth factor activator OS=Homo sapiens GN=HGFA PE=1 SV=1</b>                                | 0.05 |
| 21 |                     |                                                                                                                       |      |
| 22 | >sp Q16609          | <b>LPAL2_HUMAN Putative apolipoprotein(a)-like protein 2 OS=Homo sapiens GN=LPAL2 PE=5 SV=1</b>                       | 0.05 |
| 23 |                     |                                                                                                                       |      |
| 24 | >sp P06313          | <b>KV403_HUMAN Ig kappa chain V-IV region JI OS=Homo sapiens PE=4 SV=1</b>                                            | 0.05 |
| 25 | >sp Q01469          | <b>FABP5_HUMAN Fatty acid-binding protein, epidermal OS=Homo sapiens GN=FABP5 PE=1 SV=3</b>                           | 0.05 |
| 26 |                     |                                                                                                                       |      |
| 27 | >sp Q9BWP8          | <b>COL11_HUMAN Collectin-11 OS=Homo sapiens GN=COLEC11 PE=1 SV=1</b>                                                  | 0.05 |
| 28 | >sp Q15404          | <b>RSU1_HUMAN Ras suppressor protein 1 OS=Homo sapiens GN=RSU1 PE=1 SV=3</b>                                          | 0.05 |
| 29 |                     |                                                                                                                       |      |
| 30 | >sp Q13093          | <b>PAFA_HUMAN Platelet-activating factor acetylhydrolase OS=Homo sapiens GN=PLA2G7 PE=1 SV=1</b>                      | 0.05 |
| 31 |                     |                                                                                                                       |      |
| 32 | >sp P04438          | <b>HV208_HUMAN Ig heavy chain V-II region SESS OS=Homo sapiens PE=2 SV=1</b>                                          | 0.05 |
| 33 | >sp P61626          | <b>LYSC_HUMAN Lysozyme C OS=Homo sapiens GN=LYZ PE=1 SV=1</b>                                                         | 0.05 |
| 34 | >sp Q9Y624          | <b>JAM1_HUMAN Junctional adhesion molecule A OS=Homo sapiens GN=F11R PE=1 SV=1</b>                                    | 0.05 |
| 35 |                     |                                                                                                                       |      |
| 36 | >sp P08709          | <b>FA7_HUMAN Coagulation factor VII OS=Homo sapiens GN=F7 PE=1 SV=1</b>                                               | 0.05 |
| 37 | >sp P18206          | <b>VINC_HUMAN Vinculin OS=Homo sapiens GN=VCL PE=1 SV=4</b>                                                           | 0.04 |
| 38 | >sp P48059          | <b>LIMS1_HUMAN LIM and senescent cell antigen-like-containing domain protein 1 OS=Homo sapiens GN=LIMS1 PE=1 SV=4</b> | 0.04 |
| 39 |                     |                                                                                                                       |      |
| 40 | >sp P58335          | <b>ANTR2_HUMAN Anthrax toxin receptor 2 OS=Homo sapiens GN=ANTXR2 PE=1 SV=5</b>                                       | 0.04 |
| 41 |                     |                                                                                                                       |      |
| 42 | >sp P62937          | <b>PPIA_HUMAN Peptidyl-prolyl cis-trans isomerase A OS=Homo sapiens GN=PPIA PE=1 SV=2</b>                             | 0.04 |
| 43 |                     |                                                                                                                       |      |
| 44 | >sp P05160          | <b>F13B_HUMAN Coagulation factor XIII B chain OS=Homo sapiens GN=F13B PE=1 SV=3</b>                                   | 0.04 |
| 45 | >sp P00338          | <b>LDHA_HUMAN L-lactate dehydrogenase A chain OS=Homo sapiens GN=LDHA PE=1 SV=2</b>                                   | 0.04 |
| 46 |                     |                                                                                                                       |      |
| 47 | >sp O60240          | <b>PLIN1_HUMAN Perilipin-1 OS=Homo sapiens GN=PLIN1 PE=2 SV=2</b>                                                     | 0.04 |
| 48 | >sp Q02413          | <b>DSG1_HUMAN Desmoglein-1 OS=Homo sapiens GN=DSG1 PE=1 SV=2</b>                                                      | 0.04 |
| 49 | >sp P02774-2        | <b>VTDB_HUMAN Isoform 2 of Vitamin D-binding protein OS=Homo sapiens GN=GC</b>                                        | 0.04 |
| 50 |                     |                                                                                                                       |      |
| 51 | >sp P55103          | <b>INHBC_HUMAN Inhibin beta C chain OS=Homo sapiens GN=INHBC PE=1 SV=1</b>                                            | 0.04 |
| 52 | >sp Q15517          | <b>CDSN_HUMAN Corneodesmosin OS=Homo sapiens GN=CDSN PE=1 SV=3</b>                                                    | 0.04 |
| 53 | >sp Q2TV78          | <b>MSTP9_HUMAN Putative macrophage-stimulating protein MSTP9 OS=Homo sapiens GN=MST1P9 PE=5 SV=2</b>                  | 0.04 |
| 54 |                     |                                                                                                                       |      |
| 55 | >sp Q961Y4-2        | <b>CBPB2_HUMAN Isoform 2 of Carboxypeptidase B2 OS=Homo sapiens</b>                                                   | 0.04 |
| 56 |                     |                                                                                                                       |      |
| 57 |                     |                                                                                                                       |      |
| 58 |                     |                                                                                                                       |      |
| 59 |                     |                                                                                                                       |      |
| 60 |                     |                                                                                                                       |      |



|    |                                             |                                                                                                |      |
|----|---------------------------------------------|------------------------------------------------------------------------------------------------|------|
| 1  |                                             |                                                                                                |      |
| 2  |                                             |                                                                                                |      |
| 3  |                                             |                                                                                                |      |
| 4  |                                             | <b>GN=CPB2</b>                                                                                 |      |
| 5  | >sp P18085 ARF4_HUMAN                       | ADP-ribosylation factor 4 OS=Homo sapiens GN=ARF4 PE=1 SV=3                                    | 0.04 |
| 6  | >sp P48740-2 MASP1_HUMAN                    | Isoform 2 of Mannan-binding lectin serine protease 1 OS=Homo sapiens GN=MASP1                  | 0.04 |
| 7  | >sp Q9HBI1 PARVB_HUMAN                      | Beta-parvin OS=Homo sapiens GN=PARVB PE=1 SV=1                                                 | 0.04 |
| 8  | >sp P61224 RAP1B_HUMAN                      | Ras-related protein Rap-1b OS=Homo sapiens GN=RAP1B PE=1 SV=1                                  | 0.04 |
| 9  | >sp P07327 ADH1A_HUMAN                      | Alcohol dehydrogenase 1A OS=Homo sapiens GN=ADH1A PE=1 SV=2                                    | 0.04 |
| 10 | >sp O75223 GGCT_HUMAN                       | Gamma-glutamylcyclotransferase OS=Homo sapiens GN=GGCT PE=1 SV=1                               | 0.04 |
| 11 | >sp P41222 PTGDS_HUMAN                      | Prostaglandin-H2 D-isomerase OS=Homo sapiens GN=PTGDS PE=1 SV=1                                | 0.04 |
| 12 | >sp P15153 RAC2_HUMAN                       | Ras-related C3 botulinum toxin substrate 2 OS=Homo sapiens GN=RAC2 PE=1 SV=1                   | 0.04 |
| 13 | >sp P37802 TAGL2_HUMAN                      | Transgelin-2 OS=Homo sapiens GN=TAGLN2 PE=1 SV=3                                               | 0.04 |
| 14 | >sp P05154 IPSP_HUMAN                       | Plasma serine protease inhibitor OS=Homo sapiens GN=SERPINA5 PE=1 SV=3                         | 0.03 |
| 15 | >sp P04792 HSPB1_HUMAN                      | Heat shock protein beta-1 OS=Homo sapiens GN=HSPB1 PE=1 SV=2                                   | 0.03 |
| 16 | >sp P13224 GP1BB_HUMAN                      | Platelet glycoprotein Ib beta chain OS=Homo sapiens GN=GP1BB PE=1 SV=1                         | 0.03 |
| 17 | >sp P15814 IGLL1_HUMAN                      | Immunoglobulin lambda-like polypeptide 1 OS=Homo sapiens GN=IGLL1 PE=1 SV=1                    | 0.03 |
| 18 | >sp P08107 HSP71_HUMAN                      | Heat shock 70 kDa protein 1A/1B OS=Homo sapiens GN=HSPA1A PE=1 SV=5                            | 0.03 |
| 19 | >sp CAS1_BOVIN (Common contaminant protein) |                                                                                                | 0.03 |
| 20 | >sp P06733 ENOA_HUMAN                       | Alpha-enolase OS=Homo sapiens GN=ENO1 PE=1 SV=2                                                | 0.03 |
| 21 | >sp P07437 TBB5_HUMAN                       | Tubulin beta chain OS=Homo sapiens GN=TUBB PE=1 SV=2                                           | 0.03 |
| 22 | >sp P30041 PRDX6_HUMAN                      | Peroxiredoxin-6 OS=Homo sapiens GN=PRDX6 PE=1 SV=3                                             | 0.03 |
| 23 | >sp P02679 FIBG_HUMAN                       | Fibrinogen gamma chain OS=Homo sapiens GN=FGG PE=1 SV=3                                        | 0.03 |
| 24 | >sp P02730 B3AT_HUMAN                       | Band 3 anion transport protein OS=Homo sapiens GN=SLC4A1 PE=1 SV=3                             | 0.03 |
| 25 | >sp Q9UL12 SARDH_HUMAN                      | Sarcosine dehydrogenase, mitochondrial OS=Homo sapiens GN=SARDH PE=1 SV=1                      | 0.03 |
| 26 | >sp Q8NBP7 PCSK9_HUMAN                      | Proprotein convertase subtilisin/kexin type 9 OS=Homo sapiens GN=PCSK9 PE=1 SV=3               | 0.03 |
| 27 | >sp Q08188 TGM3_HUMAN                       | Protein-glutamine gamma-glutamyltransferase E OS=Homo sapiens GN=TGM3 PE=1 SV=4                | 0.03 |
| 28 | >sp TRFE_HUMAN (Common contaminant protein) |                                                                                                | 0.03 |
| 29 | >sp O75882 ATRN_HUMAN                       | Attractin OS=Homo sapiens GN=ATRN PE=1 SV=2                                                    | 0.03 |
| 30 | >sp Q5D862 FILA2_HUMAN                      | Filaggrin-2 OS=Homo sapiens GN=FLG2 PE=1 SV=1                                                  | 0.03 |
| 31 | >sp Q96NT3 CV013_HUMAN                      | Uncharacterized protein C22orf13 OS=Homo sapiens GN=C22orf13 PE=2 SV=2                         | 0.03 |
| 32 | >sp Q8NDH2 CC168_HUMAN                      | Coiled-coil domain-containing protein 168 OS=Homo sapiens GN=CCDC168 PE=2 SV=2                 | 0.03 |
| 33 | >sp P16284 PECA1_HUMAN                      | Platelet endothelial cell adhesion molecule OS=Homo sapiens GN=PECAM1 PE=1 SV=1                | 0.03 |
| 34 | >Reverse >sp Q92615 LAR4B_HUMAN             | La-related protein 4B OS=Homo sapiens GN=LARP4B PE=1 SV=3                                      | 0.03 |
| 35 | >sp Q12805 FBLN3_HUMAN                      | EGF-containing fibulin-like extracellular matrix protein 1 OS=Homo sapiens GN=EFEMP1 PE=1 SV=2 | 0.03 |
| 36 | >sp Q5T750 XP32_HUMAN                       | Skin-specific protein 32 OS=Homo sapiens GN=XP32 PE=1                                          | 0.03 |
| 37 |                                             |                                                                                                |      |
| 38 |                                             |                                                                                                |      |
| 39 |                                             |                                                                                                |      |
| 40 |                                             |                                                                                                |      |
| 41 |                                             |                                                                                                |      |
| 42 |                                             |                                                                                                |      |
| 43 |                                             |                                                                                                |      |
| 44 |                                             |                                                                                                |      |
| 45 |                                             |                                                                                                |      |
| 46 |                                             |                                                                                                |      |
| 47 |                                             |                                                                                                |      |
| 48 |                                             |                                                                                                |      |
| 49 |                                             |                                                                                                |      |
| 50 |                                             |                                                                                                |      |
| 51 |                                             |                                                                                                |      |
| 52 |                                             |                                                                                                |      |
| 53 |                                             |                                                                                                |      |
| 54 |                                             |                                                                                                |      |
| 55 |                                             |                                                                                                |      |
| 56 |                                             |                                                                                                |      |
| 57 |                                             |                                                                                                |      |
| 58 |                                             |                                                                                                |      |
| 59 |                                             |                                                                                                |      |
| 60 |                                             |                                                                                                |      |

| SV=1                                                                                                                                |      |  |
|-------------------------------------------------------------------------------------------------------------------------------------|------|--|
| >Reverse >sp P78415 IRX3_HUMAN Iroquois-class homeodomain protein IRX-3 OS=Homo sapiens GN=IRX3 PE=2 SV=3                           | 0.03 |  |
| >sp P20851-2 C4BPB_HUMAN Isoform 2 of C4b-binding protein beta chain OS=Homo sapiens GN=C4BPB                                       | 0.03 |  |
| >sp P08514-2 ITA2B_HUMAN Isoform 2 of Integrin alpha-IIb OS=Homo sapiens GN=ITGA2B                                                  | 0.03 |  |
| >sp KRHB1_HUMAN (Common contaminant protein)                                                                                        | 0.03 |  |
| >sp P00746 CFAD_HUMAN Complement factor D OS=Homo sapiens GN=CFD PE=1 SV=5                                                          | 0.03 |  |
| >sp P48509 CD151_HUMAN CD151 antigen OS=Homo sapiens GN=CD151 PE=1 SV=3                                                             | 0.03 |  |
| >sp Q8TDB8 GTR14_HUMAN Solute carrier family 2, facilitated glucose transporter member 14 OS=Homo sapiens GN=SLC2A14 PE=2 SV=1      | 0.03 |  |
| >sp Q9H4M9 EHD1_HUMAN EH domain-containing protein 1 OS=Homo sapiens GN=EHD1 PE=1 SV=2                                              | 0.03 |  |
| >sp P78371 TCPB_HUMAN T-complex protein 1 subunit beta OS=Homo sapiens GN=CCT2 PE=1 SV=4                                            | 0.03 |  |
| >sp P29972 AQP1_HUMAN Aquaporin-1 OS=Homo sapiens GN=AQP1 PE=1 SV=3                                                                 | 0.03 |  |
| >sp P50991 TCPD_HUMAN T-complex protein 1 subunit delta OS=Homo sapiens GN=CCT4 PE=1 SV=4                                           | 0.03 |  |
| >sp Q16610 ECM1_HUMAN Extracellular matrix protein 1 OS=Homo sapiens GN=ECM1 PE=1 SV=2                                              | 0.03 |  |
| >sp Q6ZN30 BNC2_HUMAN Zinc finger protein basonuclin-2 OS=Homo sapiens GN=BNC2 PE=2 SV=1                                            | 0.03 |  |
| >sp Q9H6X2 ANTR1_HUMAN Anthrax toxin receptor 1 OS=Homo sapiens GN=ANTXR1 PE=1 SV=2                                                 | 0.02 |  |
| >sp Q3LXA3 DHAK_HUMAN Bifunctional ATP-dependent dihydroxyacetone kinase/FAD-AMP lyase (cyclizing) OS=Homo sapiens GN=DAK PE=1 SV=2 | 0.02 |  |
| >sp P28799 GRN_HUMAN Granulins OS=Homo sapiens GN=GRN PE=1 SV=2                                                                     | 0.02 |  |
| >sp Q08554 DSC1_HUMAN Desmocollin-1 OS=Homo sapiens GN=DSC1 PE=1 SV=2                                                               | 0.02 |  |
| >sp P10646 TFPI1_HUMAN Tissue factor pathway inhibitor OS=Homo sapiens GN=TFPI PE=1 SV=1                                            | 0.02 |  |
| >sp A6NHG9 O5H14_HUMAN Olfactory receptor 5H14 OS=Homo sapiens GN=OR5H14 PE=2 SV=1                                                  | 0.02 |  |
| >Reverse >sp Q8NGI6 OR4DA_HUMAN Olfactory receptor 4D10 OS=Homo sapiens GN=OR4D10 PE=2 SV=1                                         | 0.02 |  |
| >sp P15924 DESP_HUMAN Desmoplakin OS=Homo sapiens GN=DSP PE=1 SV=3                                                                  | 0.02 |  |
| >Reverse >sp P51665 PSD7_HUMAN 26S proteasome non-ATPase regulatory subunit 7 OS=Homo sapiens GN=PSMD7 PE=1 SV=2                    | 0.02 |  |
| >sp Q15555 MARE2_HUMAN Microtubule-associated protein RP/EB family member 2 OS=Homo sapiens GN=MAPRE2 PE=1 SV=1                     | 0.02 |  |
| >sp P21333 FLNA_HUMAN Filamin-A OS=Homo sapiens GN=FLNA PE=1 SV=4                                                                   | 0.02 |  |
| >sp Q9H939 PPIP2_HUMAN Proline-serine-threonine phosphatase-interacting protein 2 OS=Homo sapiens GN=PTSTIP2 PE=1 SV=4              | 0.02 |  |
| >sp P62873 GBB1_HUMAN Guanine nucleotide-binding protein G(I)/G(S)/G(T) subunit beta-1 OS=Homo sapiens GN=GNB1 PE=1 SV=3            | 0.02 |  |
| >sp Q9NQU5 PAK6_HUMAN Serine/threonine-protein kinase PAK 6 OS=Homo sapiens GN=PAK6 PE=1 SV=1                                       | 0.02 |  |
| >sp Q9BUN1 CA056_HUMAN Uncharacterized protein C1orf56 OS=Homo sapiens GN=C1orf56 PE=1 SV=1                                         | 0.02 |  |
| >sp P23142-3 FBLN1_HUMAN Isoform B of Fibulin-1 OS=Homo sapiens GN=FBLN1                                                            | 0.02 |  |
| >sp P02788 TRFL_HUMAN Lactotransferrin OS=Homo sapiens GN=LTF PE=1 SV=6                                                             | 0.02 |  |
| >sp Q12907 LMAN2_HUMAN Vesicular integral-membrane protein VIP36 OS=Homo sapiens GN=LMAN2 PE=1 SV=1                                 | 0.02 |  |
| >Reverse >sp Q96HE9 PRR11_HUMAN Proline-rich protein 11 OS=Homo sapiens GN=PRR11 PE=1 SV=1                                          | 0.02 |  |
| >sp O14672 ADA10_HUMAN Disintegrin and metalloproteinase domain-containing protein                                                  | 0.02 |  |

|    |                                                                                             |             |
|----|---------------------------------------------------------------------------------------------|-------------|
| 1  |                                                                                             |             |
| 2  |                                                                                             |             |
| 3  | <b>10 OS=Homo sapiens GN=ADAM10 PE=1 SV=1</b>                                               |             |
| 4  | <b>&gt;sp P00739-2 HPTR_HUMAN Isoform 2 of Haptoglobin-related protein OS=Homo sapiens</b>  | <b>0.02</b> |
| 5  | <b>GN=HPR</b>                                                                               |             |
| 6  | <b>&gt;sp P28906 CD34_HUMAN Hematopoietic progenitor cell antigen CD34 OS=Homo sapiens</b>  | <b>0.02</b> |
| 7  | <b>GN=CD34 PE=1 SV=2</b>                                                                    |             |
| 8  | <b>&gt;sp Q08431 MFGM_HUMAN Lactadherin OS=Homo sapiens GN=MFGE8 PE=1 SV=2</b>              | <b>0.02</b> |
| 9  | <b>&gt;sp P29508 SPB3_HUMAN Serpin B3 OS=Homo sapiens GN=SERPINB3 PE=1 SV=2</b>             | <b>0.02</b> |
| 10 | <b>&gt;sp Q86VP1 TAXB1_HUMAN Tax1-binding protein 1 OS=Homo sapiens GN=TAX1BP1 PE=1</b>     | <b>0.02</b> |
| 11 | <b>SV=2</b>                                                                                 |             |
| 12 | <b>&gt;sp P22891 PROZ_HUMAN Vitamin K-dependent protein Z OS=Homo sapiens GN=PROZ</b>       | <b>0.02</b> |
| 13 | <b>PE=1 SV=2</b>                                                                            |             |
| 14 | <b>&gt;sp Q8IZ83 A16A1_HUMAN Aldehyde dehydrogenase family 16 member A1 OS=Homo</b>         | <b>0.02</b> |
| 15 | <b>sapiens GN=ALDH16A1 PE=1 SV=2</b>                                                        |             |
| 16 | <b>&gt;sp Q99459 CDC5L_HUMAN Cell division cycle 5-like protein OS=Homo sapiens</b>         | <b>0.02</b> |
| 17 | <b>GN=CDC5L PE=1 SV=2</b>                                                                   |             |
| 18 | <b>&gt;sp P04275 VWF_HUMAN von Willebrand factor OS=Homo sapiens GN=VWF PE=1 SV=4</b>       | <b>0.02</b> |
| 19 | <b>&gt;sp Q96P63 SPB12_HUMAN Serpin B12 OS=Homo sapiens GN=SERPINB12 PE=1 SV=1</b>          | <b>0.02</b> |
| 20 | <b>&gt;sp P07339 CATD_HUMAN Cathepsin D OS=Homo sapiens GN=CTSD PE=1 SV=1</b>               | <b>0.02</b> |
| 21 | <b>&gt;sp Q95810 SDPR_HUMAN Serum deprivation-response protein OS=Homo sapiens</b>          | <b>0.02</b> |
| 22 | <b>GN=SDPR PE=1 SV=3</b>                                                                    |             |
| 23 | <b>&gt;sp Q9UIF3 TEKT2_HUMAN Tektin-2 OS=Homo sapiens GN=TEKT2 PE=1 SV=1</b>                | <b>0.02</b> |
| 24 | <b>&gt;sp Q71U36 TBA1A_HUMAN Tubulin alpha-1A chain OS=Homo sapiens GN=TUBA1A PE=1</b>      | <b>0.02</b> |
| 25 | <b>SV=1</b>                                                                                 |             |
| 26 | <b>&gt;sp P49411 EFTU_HUMAN Elongation factor Tu, mitochondrial OS=Homo sapiens</b>         | <b>0.02</b> |
| 27 | <b>GN=TUFM PE=1 SV=2</b>                                                                    |             |
| 28 | <b>&gt;Reverse &gt;sp Q5VWP3 MLIP_HUMAN Muscular LMNA-interacting protein OS=Homo</b>       | <b>0.02</b> |
| 29 | <b>sapiens GN=MLIP PE=1 SV=3</b>                                                            |             |
| 30 | <b>&gt;sp Q14997 PSME4_HUMAN Proteasome activator complex subunit 4 OS=Homo sapiens</b>     | <b>0.02</b> |
| 31 | <b>GN=PSME4 PE=1 SV=2</b>                                                                   |             |
| 32 | <b>&gt;sp Q01518 CAP1_HUMAN Adenylyl cyclase-associated protein 1 OS=Homo sapiens</b>       | <b>0.01</b> |
| 33 | <b>GN=CAP1 PE=1 SV=5</b>                                                                    |             |
| 34 | <b>&gt;sp Q96I59 SYNM_HUMAN Probable asparagine--tRNA ligase, mitochondrial OS=Homo</b>     | <b>0.01</b> |
| 35 | <b>sapiens GN=NARS2 PE=1 SV=3</b>                                                           |             |
| 36 | <b>&gt;sp Q9UNW1 MINP1_HUMAN Multiple inositol polyphosphate phosphatase 1 OS=Homo</b>      | <b>0.01</b> |
| 37 | <b>sapiens GN=MINPP1 PE=1 SV=1</b>                                                          |             |
| 38 | <b>&gt;Reverse &gt;sp Q9Y6X9 MORC2_HUMAN MORC family CW-type zinc finger protein 2</b>      | <b>0.01</b> |
| 39 | <b>OS=Homo sapiens GN=MORC2 PE=1 SV=2</b>                                                   |             |
| 40 | <b>&gt;sp Q9Y4F1 FARP1_HUMAN FERM, RhoGEF and pleckstrin domain-containing protein 1</b>    | <b>0.01</b> |
| 41 | <b>OS=Homo sapiens GN=FARP1 PE=1 SV=1</b>                                                   |             |
| 42 | <b>&gt;sp Q13094 LCP2_HUMAN Lymphocyte cytosolic protein 2 OS=Homo sapiens GN=LCP2</b>      | <b>0.01</b> |
| 43 | <b>PE=1 SV=1</b>                                                                            |             |
| 44 | <b>&gt;sp P03951-2 FA11_HUMAN Isoform 2 of Coagulation factor XI OS=Homo sapiens GN=F11</b> | <b>0.01</b> |
| 45 | <b>&gt;sp Q8WY91 THAP4_HUMAN THAP domain-containing protein 4 OS=Homo sapiens</b>           | <b>0.01</b> |
| 46 | <b>GN=THAP4 PE=1 SV=2</b>                                                                   |             |
| 47 | <b>&gt;sp K1C10_HUMAN (Common contaminant protein)</b>                                      | <b>0.01</b> |
| 48 | <b>&gt;sp P00751-2 CFAB_HUMAN Isoform 2 of Complement factor B OS=Homo sapiens</b>          | <b>0.01</b> |
| 49 | <b>GN=CFB</b>                                                                               |             |
| 50 | <b>&gt;sp K22E_HUMAN (Common contaminant protein)</b>                                       | <b>0.01</b> |
| 51 | <b>&gt;sp P11142 HSP7C_HUMAN Heat shock cognate 71 kDa protein OS=Homo sapiens</b>          | <b>0.01</b> |
| 52 | <b>GN=HSPA8 PE=1 SV=1</b>                                                                   |             |
| 53 | <b>&gt;sp Q15303-2 ERBB4_HUMAN Isoform JM-B CYT-1 of Receptor tyrosine-protein kinase</b>   | <b>0.01</b> |
| 54 | <b>erbB-4 OS=Homo sapiens GN=ERBB4</b>                                                      |             |
| 55 | <b>&gt;sp P11021 GRP78_HUMAN 78 kDa glucose-regulated protein OS=Homo sapiens</b>           | <b>0.01</b> |
| 56 | <b>GN=HSPA5 PE=1 SV=2</b>                                                                   |             |
| 57 | <b>&gt;sp Q15582 BGH3_HUMAN Transforming growth factor-beta-induced protein ig-h3</b>       | <b>0.01</b> |
| 58 |                                                                                             |             |
| 59 |                                                                                             |             |
| 60 |                                                                                             |             |

|    |  |                                                                                    |      |
|----|--|------------------------------------------------------------------------------------|------|
| 1  |  |                                                                                    |      |
| 2  |  |                                                                                    |      |
| 3  |  |                                                                                    |      |
| 4  |  | OS=Homo sapiens GN=TGFBI PE=1 SV=1                                                 |      |
| 5  |  | >sp P23142-4 FBLN1_HUMAN Isoform C of Fibulin-1 OS=Homo sapiens GN=FBLN1           | 0.01 |
| 6  |  | >sp O00187 MASP2_HUMAN Mannan-binding lectin serine protease 2 OS=Homo sapiens     | 0.01 |
| 7  |  | GN=MASP2 PE=1 SV=4                                                                 |      |
| 8  |  | >Reverse >sp O00461 GOLI4_HUMAN Golgi integral membrane protein 4 OS=Homo          | 0.01 |
| 9  |  | sapiens GN=GOLIM4 PE=1 SV=1                                                        |      |
| 10 |  | >sp P48740 MASP1_HUMAN Mannan-binding lectin serine protease 1 OS=Homo sapiens     | 0.01 |
| 11 |  | GN=MASP1 PE=1 SV=3                                                                 |      |
| 12 |  | >sp Q5VIR6 VPS53_HUMAN Vacuolar protein sorting-associated protein 53 homolog      | 0.01 |
| 13 |  | OS=Homo sapiens GN=VPS53 PE=1 SV=1                                                 |      |
| 14 |  | >sp Q8IWA5-2 CTL2_HUMAN Isoform 2 of Choline transporter-like protein 2 OS=Homo    | 0.01 |
| 15 |  | sapiens GN=SLC44A2                                                                 |      |
| 16 |  | >sp P48378 RFX2_HUMAN DNA-binding protein RFX2 OS=Homo sapiens GN=RFX2 PE=2        | 0.01 |
| 17 |  | SV=2                                                                               |      |
| 18 |  | >sp P16070 CD44_HUMAN CD44 antigen OS=Homo sapiens GN=CD44 PE=1 SV=3               | 0.01 |
| 19 |  | >sp P49747 COMP_HUMAN Cartilage oligomeric matrix protein OS=Homo sapiens          | 0.01 |
| 20 |  | GN=COMP PE=1 SV=2                                                                  |      |
| 21 |  | >sp Q9P2D6 F135A_HUMAN Protein FAM135A OS=Homo sapiens GN=FAM135A PE=1             | 0.01 |
| 22 |  | SV=2                                                                               |      |
| 23 |  | >sp O60706 ABCC9_HUMAN ATP-binding cassette sub-family C member 9 OS=Homo          | 0.01 |
| 24 |  | sapiens GN=ABCC9 PE=1 SV=2                                                         |      |
| 25 |  | >sp P18564 ITB6_HUMAN Integrin beta-6 OS=Homo sapiens GN=ITGB6 PE=1 SV=2           | 0.01 |
| 26 |  | >Reverse >sp Q7Z745 HTRB2_HUMAN HEAT repeat-containing protein 7B2 OS=Homo         | 0.01 |
| 27 |  | sapiens GN=HEATR7B2 PE=2 SV=3                                                      |      |
| 28 |  | >sp P12111 CO6A3_HUMAN Collagen alpha-3(VI) chain OS=Homo sapiens GN=COL6A3        | 0.01 |
| 29 |  | PE=1 SV=5                                                                          |      |
| 30 |  | >sp P54886 P5CS_HUMAN Delta-1-pyrroline-5-carboxylate synthase OS=Homo sapiens     | 0.01 |
| 31 |  | GN=ALDH18A1 PE=1 SV=2                                                              |      |
| 32 |  | >sp P22223 CADH3_HUMAN Cadherin-3 OS=Homo sapiens GN=CDH3 PE=1 SV=2                | 0.01 |
| 33 |  | >sp P0C0L4 CO4A_HUMAN Complement C4-A OS=Homo sapiens GN=C4A PE=1 SV=1             | 0.01 |
| 34 |  | >sp Q8TD26 CHD6_HUMAN Chromodomain-helicase-DNA-binding protein 6 OS=Homo          | 0.01 |
| 35 |  | sapiens GN=CHD6 PE=1 SV=4                                                          |      |
| 36 |  | >Reverse >sp O75473 LGR5_HUMAN Leucine-rich repeat-containing G-protein coupled    | 0.01 |
| 37 |  | receptor 5 OS=Homo sapiens GN=LGR5 PE=2 SV=1                                       |      |
| 38 |  | >sp Q86YZ3 HORN_HUMAN Hornerin OS=Homo sapiens GN=HRNR PE=1 SV=2                   | 0.01 |
| 39 |  | >sp Q13608 PEX6_HUMAN Peroxisome assembly factor 2 OS=Homo sapiens GN=PEX6         | 0.01 |
| 40 |  | PE=1 SV=2                                                                          |      |
| 41 |  | >Reverse >sp Q9Y2M0 FAN1_HUMAN Fanconi-associated nuclease 1 OS=Homo sapiens       | 0.01 |
| 42 |  | GN=FAN1 PE=1 SV=4                                                                  |      |
| 43 |  | >Reverse >sp Q7L014 DDX46_HUMAN Probable ATP-dependent RNA helicase DDX46          | 0.01 |
| 44 |  | OS=Homo sapiens GN=DDX46 PE=1 SV=2                                                 |      |
| 45 |  | >sp Q5T5C0 STXB5_HUMAN Syntaxin-binding protein 5 OS=Homo sapiens GN=STXBP5        | 0.01 |
| 46 |  | PE=1 SV=1                                                                          |      |
| 47 |  | >sp P78509 RELN_HUMAN Reelin OS=Homo sapiens GN=RELN PE=1 SV=3                     | 0.01 |
| 48 |  | >sp Q13201 MMRN1_HUMAN Multimerin-1 OS=Homo sapiens GN=MMRN1 PE=1 SV=3             | 0.01 |
| 49 |  | >Reverse >sp Q12770 SCAP_HUMAN Sterol regulatory element-binding protein cleavage- | 0.01 |
| 50 |  | activating protein OS=Homo sapiens GN=SCAP PE=1 SV=4                               |      |
| 51 |  |                                                                                    |      |
| 52 |  |                                                                                    |      |
| 53 |  |                                                                                    |      |
| 54 |  |                                                                                    |      |
| 55 |  |                                                                                    |      |
| 56 |  |                                                                                    |      |
| 57 |  |                                                                                    |      |
| 58 |  |                                                                                    |      |
| 59 |  |                                                                                    |      |
| 60 |  |                                                                                    |      |

**Table S2.** Full hard corona proteins associated with SPIONs incubated in media (containing 10% FBS), as identified by LC MS/MS (data for 3 individual samples were provided).

### Sample 1

| Description                                                                                          | NpSp<br>C |
|------------------------------------------------------------------------------------------------------|-----------|
| >sp P01966 HBA_BOVIN Hemoglobin subunit alpha OS=Bos taurus GN=HBA PE=1 SV=2                         | 16.48     |
| >tr B0JYN6 B0JYN6_BOVIN Alpha-2-HS-glycoprotein OS=Bos taurus GN=AHSG PE=2 SV=1                      | 11.24     |
| >sp ALBU_BOVIN (Common contaminant protein)                                                          | 7.68      |
| >sp P02081 HBBF_BOVIN Hemoglobin fetal subunit beta OS=Bos taurus PE=1 SV=1                          | 6.55      |
| >sp P81644 APOA2_BOVIN Apolipoprotein A-II OS=Bos taurus GN=APOA2 PE=1 SV=2                          | 6.36      |
| >tr Q9TRP4 Q9TRP4_BOVIN Fetuin (Fragment) OS=Bos taurus PE=1 SV=1                                    | 4.97      |
| >sp P34955 A1AT_BOVIN Alpha-1-antiproteinase OS=Bos taurus GN=SERPINA1 PE=1 SV=1                     | 4.55      |
| >sp P15497 APOA1_BOVIN Apolipoprotein A-I OS=Bos taurus GN=APOA1 PE=1 SV=3                           | 4.48      |
| >sp HBA_HUMAN (Common contaminant protein)                                                           | 1.55      |
| >sp P19035 APOC3_BOVIN Apolipoprotein C-III OS=Bos taurus GN=APOC3 PE=1 SV=2                         | 1.36      |
| >sp Q03247 APOE_BOVIN Apolipoprotein E OS=Bos taurus GN=APOE PE=2 SV=1                               | 1.03      |
| >tr B0JYQ0 B0JYQ0_BOVIN ALB protein OS=Bos taurus GN=ALB PE=2 SV=1                                   | 0.98      |
| >sp P12763 FETUA_BOVIN Alpha-2-HS-glycoprotein OS=Bos taurus GN=AHSG PE=1 SV=2                       | 0.96      |
| >sp P19034 APOC2_BOVIN Apolipoprotein C-II OS=Bos taurus GN=APOC2 PE=1 SV=2                          | 0.81      |
| >sp Q3SZ57 FETA_BOVIN Alpha-fetoprotein OS=Bos taurus GN=AFP PE=2 SV=1                               | 0.79      |
| >sp K1C10_HUMAN (Common contaminant protein)                                                         | 0.71      |
| >sp K2C1_HUMAN (Common contaminant protein)                                                          | 0.71      |
| >tr E1BI48 E1BI48_BOVIN Uncharacterized protein OS=Bos taurus GN=KRTDAP PE=4 SV=1                    | 0.68      |
| >tr G3N0S9 G3N0S9_BOVIN Uncharacterized protein OS=Bos taurus GN=LOC515150 PE=4 SV=1                 | 0.66      |
| >sp P00735 THRB_BOVIN Prothrombin OS=Bos taurus GN=F2 PE=1 SV=2                                      | 0.64      |
| >sp K1C9_HUMAN (Common contaminant protein)                                                          | 0.64      |
| >sp O46375 TTHY_BOVIN Transthyretin OS=Bos taurus GN=TTR PE=1 SV=1                                   | 0.62      |
| >tr Q1RMN9 Q1RMN9_BOVIN C4b-binding protein alpha-like OS=Bos taurus GN=LOC510860 PE=2 SV=1          | 0.61      |
| >tr F1MD83 F1MD83_BOVIN Platelet factor 4 OS=Bos taurus GN=PF4 PE=3 SV=1                             | 0.59      |
| >sp P41361 ANT3_BOVIN Antithrombin-III OS=Bos taurus GN=SERPINC1 PE=1 SV=2                           | 0.57      |
| >tr F1N5M2 F1N5M2_BOVIN Vitamin D-binding protein OS=Bos taurus GN=GC PE=4 SV=2                      | 0.49      |
| >tr G3X6N3 G3X6N3_BOVIN Serotransferrin OS=Bos taurus GN=TF PE=4 SV=1                                | 0.49      |
| >tr A6QPP2 A6QPP2_BOVIN SERPIND1 protein OS=Bos taurus GN=SERPIND1 PE=2 SV=1                         | 0.49      |
| >tr Q3SZH5 Q3SZH5_BOVIN Angiotensinogen OS=Bos taurus GN=AGT PE=2 SV=1                               | 0.49      |
| >tr E1BIG6 E1BIG6_BOVIN Uncharacterized protein OS=Bos taurus GN=TFRC PE=4 SV=2                      | 0.47      |
| >sp Q58D62 FETUB_BOVIN Fetuin-B OS=Bos taurus GN=FETUB PE=2 SV=1                                     | 0.46      |
| >sp Q3SZR3 A1AG_BOVIN Alpha-1-acid glycoprotein OS=Bos taurus GN=ORM1 PE=2 SV=1                      | 0.44      |
| >sp P60712 ACTB_BOVIN Actin, cytoplasmic 1 OS=Bos taurus GN=ACTB PE=1 SV=1                           | 0.42      |
| >sp Q3T052 ITIH4_BOVIN Inter-alpha-trypsin inhibitor heavy chain H4 OS=Bos taurus GN=ITIH4 PE=1 SV=1 | 0.41      |
| >sp K22E_HUMAN (Common contaminant protein)                                                          | 0.41      |

|    |                                                                               |      |
|----|-------------------------------------------------------------------------------|------|
| 1  |                                                                               |      |
| 2  |                                                                               |      |
| 3  | >sp P01044-2 KNG1_BOVIN Isoform LMW of Kininogen-1 OS=Bos taurus GN=KNG1      | 0.38 |
| 4  | >sp Q2UVX4 CO3_BOVIN Complement C3 OS=Bos taurus GN=C3 PE=1 SV=2              | 0.38 |
| 5  | >tr Q3ZBS7 Q3ZBS7_BOVIN Uncharacterized protein OS=Bos taurus GN=VTN PE=2     | 0.38 |
| 6  | SV=1                                                                          |      |
| 7  | >sp Q2KIS7 TETN_BOVIN Tetranectin OS=Bos taurus GN=CLEC3B PE=2 SV=1           | 0.38 |
| 8  | >sp Q7SIH1 A2MG_BOVIN Alpha-2-macroglobulin OS=Bos taurus GN=A2M PE=1 SV=2    | 0.35 |
| 9  | >sp P61223 RAP1B_BOVIN Ras-related protein Rap-1b OS=Bos taurus GN=RAP1B PE=2 | 0.35 |
| 10 | SV=1                                                                          |      |
| 11 | >sp P17697 CLUS_BOVIN Clusterin OS=Bos taurus GN=CLU PE=1 SV=1                | 0.35 |
| 12 | >tr F1MNW4 F1MNW4_BOVIN Inter-alpha-trypsin inhibitor heavy chain H2 OS=Bos   | 0.33 |
| 13 | taurus GN=ITIH2 PE=4 SV=2                                                     |      |
| 14 | >sp K1M1_SHEEP (Common contaminant protein)                                   | 0.33 |
| 15 | >sp P0C0S9 H2A1_BOVIN Histone H2A type 1 OS=Bos taurus PE=1 SV=2              | 0.33 |
| 16 | >sp P02769 ALBU_BOVIN Serum albumin OS=Bos taurus GN=ALB PE=1 SV=4            | 0.33 |
| 17 | >Reverse >tr E1BH55 E1BH55_BOVIN Uncharacterized protein OS=Bos taurus        | 0.30 |
| 18 | GN=LOC504623 PE=3 SV=2                                                        |      |
| 19 | >sp P17690 APOH_BOVIN Beta-2-glycoprotein 1 OS=Bos taurus GN=APOH PE=1 SV=4   | 0.29 |
| 20 | >sp Q32PJ2 APOA4_BOVIN Apolipoprotein A-IV OS=Bos taurus GN=APOA4 PE=2 SV=1   | 0.29 |
| 21 | >tr A6QPP9 A6QPP9_BOVIN PF4 protein OS=Bos taurus GN=PF4 PE=3 SV=1            | 0.28 |
| 22 | >sp TRYP_PIG (Common contaminant protein)                                     | 0.28 |
| 23 | >tr F1MYN5 F1MYN5_BOVIN Fibulin-1 OS=Bos taurus GN=FBLN1 PE=3 SV=2            | 0.27 |
| 24 | >tr J9QD97 J9QD97_BOVIN Periostin variant 9 OS=Bos taurus PE=2 SV=1           | 0.27 |
| 25 | >tr F1N1I6 F1N1I6_BOVIN Gelsolin OS=Bos taurus GN=GSN PE=4 SV=1               | 0.26 |
| 26 | >tr E1BIK4 E1BIK4_BOVIN Uncharacterized protein OS=Bos taurus GN=PPBP PE=3    | 0.26 |
| 27 | SV=1                                                                          |      |
| 28 | >sp P01035 CYTC_BOVIN Cystatin-C OS=Bos taurus GN=CST3 PE=1 SV=2              | 0.25 |
| 29 | >sp P02672 FIBA_BOVIN Fibrinogen alpha chain OS=Bos taurus GN=FGA PE=1 SV=5   | 0.24 |
| 30 | >sp Q3SYR5 APOC4_BOVIN Apolipoprotein C-IV OS=Bos taurus GN=APOC4 PE=2 SV=1   | 0.24 |
| 31 | >tr Q5I2B0 Q5I2B0_BOVIN Mannan-binding lectin A OS=Bos taurus GN=MBL-A PE=2   | 0.22 |
| 32 | SV=1                                                                          |      |
| 33 | >tr D5MTL9 D5MTL9_BOVIN Glycophorin B variant 1 OS=Bos taurus GN=gypb PE=4    | 0.21 |
| 34 | SV=1                                                                          |      |
| 35 | >sp A2I7N3 SPA37_BOVIN Serpin A3-7 OS=Bos taurus GN=SERPINA3-7 PE=3 SV=1      | 0.21 |
| 36 | >tr G1K122 G1K122_BOVIN Retinol-binding protein 4 OS=Bos taurus GN=RBP4 PE=3  | 0.20 |
| 37 | SV=1                                                                          |      |
| 38 | >sp Q9N2I2 IPSP_BOVIN Plasma serine protease inhibitor OS=Bos taurus          | 0.20 |
| 39 | GN=SERPINA5 PE=1 SV=1                                                         |      |
| 40 | >tr G5E513 G5E513_BOVIN Uncharacterized protein (Fragment) OS=Bos taurus PE=4 | 0.19 |
| 41 | SV=1                                                                          |      |
| 42 | >sp P28800 A2AP_BOVIN Alpha-2-antiplasmin OS=Bos taurus GN=SERPINF2 PE=1      | 0.19 |
| 43 | SV=2                                                                          |      |
| 44 | >sp P37141 GPX3_BOVIN Glutathione peroxidase 3 OS=Bos taurus GN=GPX3 PE=2     | 0.19 |
| 45 | SV=2                                                                          |      |
| 46 | >tr F1MAV0 F1MAV0_BOVIN Fibrinogen beta chain OS=Bos taurus GN=FGB PE=4 SV=2  | 0.18 |
| 47 | >sp P00978 AMBP_BOVIN Protein AMBP OS=Bos taurus GN=AMBP PE=1 SV=2            | 0.18 |
| 48 | >tr E1BH06 E1BH06_BOVIN Uncharacterized protein OS=Bos taurus GN=C4A PE=4     | 0.17 |
| 49 | SV=2                                                                          |      |
| 50 | >sp P33046 CTHL4_BOVIN Cathelicidin-4 OS=Bos taurus GN=CATHL4 PE=1 SV=1       | 0.17 |
| 51 | >sp P35541 SAA_BOVIN Serum amyloid A protein OS=Bos taurus GN=SAA1 PE=1 SV=2  | 0.16 |
| 52 | >sp Q2KJF1 A1BG_BOVIN Alpha-1B-glycoprotein OS=Bos taurus GN=A1BG PE=1 SV=1   | 0.16 |
| 53 | >sp A4FUZ0 KRT83_BOVIN Keratin, type II cuticular Hb3 OS=Bos taurus GN=KRT83  | 0.16 |
| 54 | PE=2 SV=1                                                                     |      |
| 55 | >tr Q861V5 Q861V5_BOVIN Peptidyl-prolyl cis-trans isomerase (Fragment) OS=Bos | 0.16 |
| 56 | taurus PE=2 SV=1                                                              |      |
| 57 | >sp P10096 G3P_BOVIN Glyceraldehyde-3-phosphate dehydrogenase OS=Bos taurus   | 0.16 |
| 58 |                                                                               |      |
| 59 |                                                                               |      |
| 60 |                                                                               |      |

|    |                                                                                    |                           |      |
|----|------------------------------------------------------------------------------------|---------------------------|------|
| 1  |                                                                                    |                           |      |
| 2  |                                                                                    |                           |      |
| 3  |                                                                                    | <b>GN=GAPDH PE=1 SV=4</b> |      |
| 4  | >sp Q3SZV7 HEMO_BOVIN Hemopexin OS=Bos taurus GN=HPX PE=2 SV=1                     |                           | 0.15 |
| 5  | >tr F1N2P8 F1N2P8_BOVIN Insulin-like growth factor-binding protein 2 OS=Bos taurus |                           | 0.15 |
| 6  | <b>GN=IGFBP2 PE=4 SV=2</b>                                                         |                           |      |
| 7  | >sp P07507 MGP_BOVIN Matrix Gla protein OS=Bos taurus GN=MGP PE=1 SV=1             |                           | 0.15 |
| 8  | >sp P56652 ITIH3_BOVIN Inter-alpha-trypsin inhibitor heavy chain H3 OS=Bos taurus  |                           | 0.15 |
| 9  | <b>GN=ITIH3 PE=1 SV=2</b>                                                          |                           |      |
| 10 | >tr F1MHE4 F1MHE4_BOVIN Uncharacterized protein OS=Bos taurus GN=PLVAP PE=4        |                           | 0.14 |
| 11 | <b>SV=1</b>                                                                        |                           |      |
| 12 | >sp Q28178 TSP1_BOVIN Thrombospondin-1 OS=Bos taurus GN=THBS1 PE=2 SV=2            |                           | 0.14 |
| 13 | >sp P60661 MYL6_BOVIN Myosin light polypeptide 6 OS=Bos taurus GN=MYL6 PE=2        |                           | 0.14 |
| 14 | <b>SV=2</b>                                                                        |                           |      |
| 15 | >sp Q9TTE1 SPA31_BOVIN Serpin A3-1 OS=Bos taurus GN=SERPINA3-1 PE=1 SV=3           |                           | 0.14 |
| 16 | >sp P79105 S10AC_BOVIN Protein S100-A12 OS=Bos taurus GN=S100A12 PE=1 SV=3         |                           | 0.13 |
| 17 | >sp P50448 F12AI_BOVIN Factor XIIa inhibitor OS=Bos taurus PE=1 SV=1               |                           | 0.13 |
| 18 | >tr F1MYX2 F1MYX2_BOVIN Uncharacterized protein OS=Bos taurus GN=APOM PE=4         |                           | 0.13 |
| 19 | <b>SV=1</b>                                                                        |                           |      |
| 20 | >tr F1MC11 F1MC11_BOVIN Keratin, type I cytoskeletal 14 OS=Bos taurus GN=KRT14     |                           | 0.12 |
| 21 | <b>PE=3 SV=2</b>                                                                   |                           |      |
| 22 | >sp O62644 LECT2_BOVIN Leukocyte cell-derived chemotaxin-2 OS=Bos taurus           |                           | 0.12 |
| 23 | <b>GN=LECT2 PE=1 SV=1</b>                                                          |                           |      |
| 24 | >sp Q3T0I5 FIS1_BOVIN Mitochondrial fission 1 protein OS=Bos taurus GN=FIS1 PE=2   |                           | 0.12 |
| 25 | <b>SV=1</b>                                                                        |                           |      |
| 26 | >tr E1BNR0 E1BNR0_BOVIN Uncharacterized protein OS=Bos taurus GN=APOB PE=4         |                           | 0.12 |
| 27 | <b>SV=2</b>                                                                        |                           |      |
| 28 | >sp P68103 EF1A1_BOVIN Elongation factor 1-alpha 1 OS=Bos taurus GN=EEF1A1 PE=2    |                           | 0.12 |
| 29 | <b>SV=1</b>                                                                        |                           |      |
| 30 | >sp Q2KJH6 SERPH_BOVIN Serpin H1 OS=Bos taurus GN=SERPINH1 PE=2 SV=1               |                           | 0.12 |
| 31 | >sp Q3T149 HSPB1_BOVIN Heat shock protein beta-1 OS=Bos taurus GN=HSPB1 PE=2       |                           | 0.11 |
| 32 | <b>SV=1</b>                                                                        |                           |      |
| 33 | >tr Q3SZZ9 Q3SZZ9_BOVIN FGG protein OS=Bos taurus GN=FGG PE=2 SV=1                 |                           | 0.10 |
| 34 | >tr Q3ZC87 Q3ZC87_BOVIN Pyruvate kinase (Fragment) OS=Bos taurus GN=PKM2 PE=2      |                           | 0.10 |
| 35 | <b>SV=1</b>                                                                        |                           |      |
| 36 | >sp P07456 IGF2_BOVIN Insulin-like growth factor II OS=Bos taurus GN=IGF2 PE=1     |                           | 0.10 |
| 37 | <b>SV=4</b>                                                                        |                           |      |
| 38 | >tr E1BGJ4 E1BGJ4_BOVIN Uncharacterized protein OS=Bos taurus GN=MAN2A2 PE=4       |                           | 0.10 |
| 39 | <b>SV=1</b>                                                                        |                           |      |
| 40 | >Reverse >tr E1BIG0 E1BIG0_BOVIN Uncharacterized protein OS=Bos taurus             |                           | 0.10 |
| 41 | <b>GN=METTL6 PE=4 SV=1</b>                                                         |                           |      |
| 42 | >sp Q3T0P6 PGK1_BOVIN Phosphoglycerate kinase 1 OS=Bos taurus GN=PGK1 PE=2         |                           | 0.09 |
| 43 | <b>SV=3</b>                                                                        |                           |      |
| 44 | >tr E1BJK2 E1BJK2_BOVIN Uncharacterized protein OS=Bos taurus GN=TUBB1 PE=3        |                           | 0.09 |
| 45 | <b>SV=1</b>                                                                        |                           |      |
| 46 | >sp P01045-2 KNG2_BOVIN Isoform LMW of Kininogen-2 OS=Bos taurus GN=KNG2           |                           | 0.09 |
| 47 | >sp P63217 GBG5_BOVIN Guanine nucleotide-binding protein G(I)/G(S)/G(O) subunit    |                           | 0.09 |
| 48 | <b>gamma-5 OS=Bos taurus GN=GNG5 PE=1 SV=1</b>                                     |                           |      |
| 49 | >sp P81187 CFAB_BOVIN Complement factor B OS=Bos taurus GN=CFB PE=1 SV=2           |                           | 0.09 |
| 50 | >tr A5PJ69 A5PJ69_BOVIN SERPINA10 protein OS=Bos taurus GN=SERPINA10 PE=2          |                           | 0.09 |
| 51 | <b>SV=1</b>                                                                        |                           |      |
| 52 | >Reverse >tr E1BFJ1 E1BFJ1_BOVIN Uncharacterized protein OS=Bos taurus             |                           | 0.09 |
| 53 | <b>GN=TPRG1 PE=4 SV=1</b>                                                          |                           |      |
| 54 | >sp Q27975 HS71A_BOVIN Heat shock 70 kDa protein 1A OS=Bos taurus GN=HSPA1A        |                           | 0.09 |
| 55 | <b>PE=1 SV=2</b>                                                                   |                           |      |
| 56 | >tr F1N4M7 F1N4M7_BOVIN Uncharacterized protein OS=Bos taurus GN=CFI PE=3 SV=2     |                           | 0.08 |
| 57 | >tr Q2TBQ1 Q2TBQ1_BOVIN Coagulation factor XIII, B polypeptide OS=Bos taurus       |                           | 0.08 |
| 58 |                                                                                    |                           |      |
| 59 |                                                                                    |                           |      |
| 60 |                                                                                    |                           |      |

|    |                         |                                                                                                     |      |
|----|-------------------------|-----------------------------------------------------------------------------------------------------|------|
| 1  |                         |                                                                                                     |      |
| 2  |                         |                                                                                                     |      |
| 3  |                         |                                                                                                     |      |
| 4  |                         | <b>GN=F13B PE=2 SV=1</b>                                                                            |      |
| 5  | >sp P13135 CPNS1_BOVIN  | Calpain small subunit 1 OS=Bos taurus GN=CAPNS1 PE=2 SV=1                                           | 0.08 |
| 6  | >sp Q2KIG3 CBPB2_BOVIN  | Carboxypeptidase B2 OS=Bos taurus GN=CPB2 PE=1 SV=1                                                 | 0.08 |
| 7  | >tr G3N2D7 G3N2D7_BOVIN | Uncharacterized protein (Fragment) OS=Bos taurus GN=IGLL1 PE=4 SV=1                                 | 0.08 |
| 8  | >tr F6S1Q0 F6S1Q0_BOVIN | Uncharacterized protein OS=Bos taurus GN=KRT18 PE=3 SV=1                                            | 0.08 |
| 9  | >tr G3N1Y3 G3N1Y3_BOVIN | Uncharacterized protein (Fragment) OS=Bos taurus PE=3 SV=1                                          | 0.08 |
| 10 | >tr F1MNV5 F1MNV5_BOVIN | Kininogen-1 OS=Bos taurus GN=KNG1 PE=4 SV=2                                                         | 0.08 |
| 11 | >sp Q5E9F5 TAGL2_BOVIN  | Transgelin-2 OS=Bos taurus GN=TAGLN2 PE=2 SV=3                                                      | 0.08 |
| 12 | >sp Q2TBI0 LBP_BOVIN    | Lipopolysaccharide-binding protein OS=Bos taurus GN=LBP PE=2 SV=1                                   | 0.08 |
| 13 | >tr A7E350 A7E350_BOVIN | PLG protein OS=Bos taurus GN=PLG PE=2 SV=1                                                          | 0.08 |
| 14 | >tr Q58DK0 Q58DK0_BOVIN | Integrin alpha 2b OS=Bos taurus GN=ITGA2B PE=2 SV=1                                                 | 0.07 |
| 15 | >sp Q2M2T1 H2B1K_BOVIN  | Histone H2B type 1-K OS=Bos taurus GN=HIST1H2BK PE=1 SV=3                                           | 0.07 |
| 16 | >tr F1MSZ6 F1MSZ6_BOVIN | Antithrombin-III OS=Bos taurus GN=SERPINC1 PE=3 SV=1                                                | 0.07 |
| 17 | >sp Q3MHN5 VTDB_BOVIN   | Vitamin D-binding protein OS=Bos taurus GN=GC PE=2 SV=1                                             | 0.07 |
| 18 | >tr F1N0I3 F1N0I3_BOVIN | Coagulation factor V OS=Bos taurus GN=F5 PE=4 SV=2                                                  | 0.07 |
| 19 | >sp P84080 ARF1_BOVIN   | ADP-ribosylation factor 1 OS=Bos taurus GN=ARF1 PE=1 SV=2                                           | 0.07 |
| 20 | >sp P82943 REG1_BOVIN   | Regakine-1 OS=Bos taurus PE=1 SV=2                                                                  | 0.07 |
| 21 | >sp Q95121 PEDF_BOVIN   | Pigment epithelium-derived factor OS=Bos taurus GN=SERPINF1 PE=1 SV=1                               | 0.07 |
| 22 | >sp P33072 LYOX_BOVIN   | Protein-lysine 6-oxidase OS=Bos taurus GN=LOX PE=1 SV=3                                             | 0.07 |
| 23 | >tr O77679 O77679_BOVIN | Glyceraldehyde 3-phosphate dehydrogenase (Fragment) OS=Bos taurus GN=G3PDH PE=2 SV=1                | 0.07 |
| 24 | >sp P02070 HBB_BOVIN    | Hemoglobin subunit beta OS=Bos taurus GN=HBB PE=1 SV=1                                              | 0.06 |
| 25 | >sp P20959 IBP3_BOVIN   | Insulin-like growth factor-binding protein 3 OS=Bos taurus GN=IGFBP3 PE=1 SV=3                      | 0.06 |
| 26 | >sp P04815 BPT2_BOVIN   | Spleen trypsin inhibitor I OS=Bos taurus PE=1 SV=2                                                  | 0.06 |
| 27 | >tr Q9XSN4 Q9XSN4_BOVIN | Glyceraldehyde-3-phosphate dehydrogenase (Fragment) OS=Bos taurus GN=GAPDL17 PE=2 SV=1              | 0.06 |
| 28 | >sp P27674 GTR1_BOVIN   | Solute carrier family 2, facilitated glucose transporter member 1 OS=Bos taurus GN=SLC2A1 PE=2 SV=1 | 0.06 |
| 29 | >sp Q5E9F7 COF1_BOVIN   | Cofilin-1 OS=Bos taurus GN=CFL1 PE=2 SV=3                                                           | 0.05 |
| 30 | >tr J9ZW47 J9ZW47_BOVIN | Integrin beta OS=Bos taurus PE=2 SV=1                                                               | 0.05 |
| 31 | >tr Q58DL9 Q58DL9_BOVIN | Phospholipid transfer protein OS=Bos taurus GN=PLTP PE=2 SV=1                                       | 0.05 |
| 32 | >tr Q3ZBQ9 Q3ZBQ9_BOVIN | APOM protein OS=Bos taurus GN=APOM PE=4 SV=1                                                        | 0.05 |
| 33 | >tr Q9XSW5 Q9XSW5_BOVIN | Band 3 protein OS=Bos taurus GN=BEB3 PE=2 SV=1                                                      | 0.05 |
| 34 | >sp P01888 B2MG_BOVIN   | Beta-2-microglobulin OS=Bos taurus GN=B2M PE=1 SV=2                                                 | 0.05 |
| 35 | >sp P04985-3 ELN_BOVIN  | Isoform 3 of Elastin OS=Bos taurus GN=ELN                                                           | 0.05 |
| 36 | >sp P01044 KNG1_BOVIN   | Kininogen-1 OS=Bos taurus GN=KNG1 PE=1 SV=1                                                         | 0.05 |
| 37 | >sp Q32KY0 APOD_BOVIN   | Apolipoprotein D OS=Bos taurus GN=APOD PE=2 SV=1                                                    | 0.05 |
| 38 | >tr A8R3Y9 A8R3Y9_BOVIN | PTBP2 protein OS=Bos taurus GN=PTBP2 PE=2 SV=1                                                      | 0.05 |
| 39 | >sp P62998 RAC1_BOVIN   | Ras-related C3 botulinum toxin substrate 1 OS=Bos taurus GN=RAC1 PE=1 SV=1                          | 0.05 |
| 40 | >tr E1BQ13 E1BQ13_BOVIN | Uncharacterized protein OS=Bos taurus GN=LRRRC66 PE=4 SV=2                                          | 0.05 |
| 41 | >tr F1MDH3 F1MDH3_BOVIN | Uncharacterized protein (Fragment) OS=Bos taurus GN=TLN1 PE=4 SV=2                                  | 0.05 |
| 42 |                         |                                                                                                     |      |
| 43 |                         |                                                                                                     |      |
| 44 |                         |                                                                                                     |      |
| 45 |                         |                                                                                                     |      |
| 46 |                         |                                                                                                     |      |
| 47 |                         |                                                                                                     |      |
| 48 |                         |                                                                                                     |      |
| 49 |                         |                                                                                                     |      |
| 50 |                         |                                                                                                     |      |
| 51 |                         |                                                                                                     |      |
| 52 |                         |                                                                                                     |      |
| 53 |                         |                                                                                                     |      |
| 54 |                         |                                                                                                     |      |
| 55 |                         |                                                                                                     |      |
| 56 |                         |                                                                                                     |      |
| 57 |                         |                                                                                                     |      |
| 58 |                         |                                                                                                     |      |
| 59 |                         |                                                                                                     |      |
| 60 |                         |                                                                                                     |      |



|    |                                             |                                                                                                     |      |
|----|---------------------------------------------|-----------------------------------------------------------------------------------------------------|------|
| 1  |                                             |                                                                                                     |      |
| 2  |                                             |                                                                                                     |      |
| 3  | >sp Q27967 SPP24_BOVIN                      | Secreted phosphoprotein 24 OS=Bos taurus GN=SPP2 PE=1 SV=2                                          | 0.04 |
| 4  |                                             |                                                                                                     |      |
| 5  | >sp Q6B411 LYSM_BOVIN                       | Lysozyme C, milk isozyme OS=Bos taurus PE=2 SV=1                                                    | 0.04 |
| 6  | >tr A5D9D2 A5D9D2_BOVIN                     | Complement component 4 binding protein, alpha chain OS=Bos taurus GN=C4BPA PE=2 SV=1                | 0.04 |
| 7  |                                             |                                                                                                     |      |
| 8  | >sp P98140 FA12_BOVIN                       | Coagulation factor XII OS=Bos taurus GN=F12 PE=1 SV=2                                               | 0.04 |
| 9  | >tr Q2YDK6 Q2YDK6_BOVIN                     | Dickkopf-like 1 (Soggy) OS=Bos taurus GN=DKKL1 PE=2 SV=1                                            | 0.04 |
| 10 |                                             |                                                                                                     |      |
| 11 | >tr G5E5T5 G5E5T5_BOVIN                     | Uncharacterized protein (Fragment) OS=Bos taurus PE=4 SV=1                                          | 0.04 |
| 12 |                                             |                                                                                                     |      |
| 13 | >tr A5D7S8 A5D7S8_BOVIN                     | Fibulin-1 OS=Bos taurus GN=FBLN1 PE=2 SV=1                                                          | 0.04 |
| 14 | >sp P33433 HRG_BOVIN                        | Histidine-rich glycoprotein (Fragments) OS=Bos taurus GN=HRG PE=1 SV=1                              | 0.04 |
| 15 |                                             |                                                                                                     |      |
| 16 | >tr A1L5B6 A1L5B6_BOVIN                     | Annexin OS=Bos taurus GN=ANXA5 PE=2 SV=1                                                            | 0.04 |
| 17 | >sp Q5E9B1 LDHB_BOVIN                       | L-lactate dehydrogenase B chain OS=Bos taurus GN=LDHB PE=2 SV=4                                     | 0.04 |
| 18 |                                             |                                                                                                     |      |
| 19 | >sp A6QQ91 RASL3_BOVIN                      | RAS protein activator like-3 OS=Bos taurus GN=RASAL3 PE=2 SV=1                                      | 0.04 |
| 20 |                                             |                                                                                                     |      |
| 21 | >tr F1MTT5 F1MTT5_BOVIN                     | Uncharacterized protein (Fragment) OS=Bos taurus GN=LOC786996 PE=4 SV=2                             | 0.04 |
| 22 |                                             |                                                                                                     |      |
| 23 | >sp K1H5_HUMAN (Common contaminant protein) |                                                                                                     | 0.04 |
| 24 | >tr Q2KJJ7 Q2KJJ7_BOVIN                     | Serine peptidase inhibitor, Kunitz type 1 OS=Bos taurus GN=SPINT1 PE=2 SV=1                         | 0.04 |
| 25 |                                             |                                                                                                     |      |
| 26 | >tr Q2KIF2 Q2KIF2_BOVIN                     | Leucine-rich alpha-2-glycoprotein 1 OS=Bos taurus GN=LRG1 PE=2 SV=1                                 | 0.04 |
| 27 |                                             |                                                                                                     |      |
| 28 | >tr K4JDT2 K4JDT2_BOVIN                     | Alpha-2-macroglobulin variant 20 OS=Bos taurus GN=A2M PE=2 SV=1                                     | 0.03 |
| 29 |                                             |                                                                                                     |      |
| 30 | >tr A5D7E1 A5D7E1_BOVIN                     | MGC139254 protein OS=Bos taurus GN=MGC139254 PE=2 SV=1                                              | 0.03 |
| 31 |                                             |                                                                                                     |      |
| 32 | >sp P81947 TBA1B_BOVIN                      | Tubulin alpha-1B chain OS=Bos taurus PE=1 SV=2                                                      | 0.03 |
| 33 | >sp P19120 HSP7C_BOVIN                      | Heat shock cognate 71 kDa protein OS=Bos taurus GN=HSPA8 PE=1 SV=2                                  | 0.03 |
| 34 |                                             |                                                                                                     |      |
| 35 | >sp Q95122 CD14_BOVIN                       | Monocyte differentiation antigen CD14 OS=Bos taurus GN=CD14 PE=2 SV=2                               | 0.03 |
| 36 |                                             |                                                                                                     |      |
| 37 | >sp Q3SYV4 CAP1_BOVIN                       | Adenylyl cyclase-associated protein 1 OS=Bos taurus GN=CAP1 PE=2 SV=3                               | 0.03 |
| 38 |                                             |                                                                                                     |      |
| 39 | >tr E1B898 E1B898_BOVIN                     | Uncharacterized protein OS=Bos taurus GN=KRT86 PE=3 SV=1                                            | 0.03 |
| 40 |                                             |                                                                                                     |      |
| 41 | >sp P58352 GTR3_BOVIN                       | Solute carrier family 2, facilitated glucose transporter member 3 OS=Bos taurus GN=SLC2A3 PE=2 SV=1 | 0.03 |
| 42 |                                             |                                                                                                     |      |
| 43 | >sp Q9BGI3 PRDX2_BOVIN                      | Peroxiredoxin-2 OS=Bos taurus GN=PRDX2 PE=2 SV=1                                                    | 0.03 |
| 44 | >tr G3X7A8 G3X7A8_BOVIN                     | Uncharacterized protein OS=Bos taurus GN=PTI PE=4 SV=1                                              | 0.03 |
| 45 | >tr O77765 O77765_BOVIN                     | Superficial zone protein (Fragment) OS=Bos taurus PE=2 SV=1                                         | 0.03 |
| 46 |                                             |                                                                                                     |      |
| 47 | >sp Q0VCM5 ITIH1_BOVIN                      | Inter-alpha-trypsin inhibitor heavy chain H1 OS=Bos taurus GN=ITIH1 PE=2 SV=1                       | 0.03 |
| 48 |                                             |                                                                                                     |      |
| 49 | >sp ALBU_HUMAN (Common contaminant protein) |                                                                                                     | 0.03 |
| 50 | >tr F1MMD7 F1MMD7_BOVIN                     | Inter-alpha-trypsin inhibitor heavy chain H4 OS=Bos taurus GN=ITIH4 PE=4 SV=2                       | 0.03 |
| 51 |                                             |                                                                                                     |      |
| 52 | >tr Q17QH1 Q17QH1_BOVIN                     | APOF protein OS=Bos taurus GN=APOF PE=2 SV=2                                                        | 0.03 |
| 53 | >sp Q9TT36 THBG_BOVIN                       | Thyroxine-binding globulin OS=Bos taurus GN=SERPINA7 PE=2 SV=1                                      | 0.03 |
| 54 |                                             |                                                                                                     |      |
| 55 | >tr E1B991 E1B991_BOVIN                     | Uncharacterized protein OS=Bos taurus GN=KRT2 PE=3 SV=2                                             | 0.03 |
| 56 |                                             |                                                                                                     |      |
| 57 | >tr Q32T06 Q32T06_BOVIN                     | Endopin 2C OS=Bos taurus PE=2 SV=1                                                                  | 0.03 |
| 58 |                                             |                                                                                                     |      |
| 59 |                                             |                                                                                                     |      |
| 60 |                                             |                                                                                                     |      |

|    |                                                                                      |      |
|----|--------------------------------------------------------------------------------------|------|
| 1  |                                                                                      |      |
| 2  |                                                                                      |      |
| 3  | >tr Q9TS85 Q9TS85_BOVIN Histidine-rich GLYCOPROTEIN=FACTOR XIIIa substrate           | 0.03 |
| 4  | (Fragments) OS=Bos taurus PE=1 SV=1                                                  |      |
| 5  | >tr G5E604 G5E604_BOVIN Uncharacterized protein (Fragment) OS=Bos taurus PE=4        | 0.03 |
| 6  | SV=1                                                                                 |      |
| 7  | >sp K2M1_SHEEP (Common contaminant protein)                                          | 0.03 |
| 8  | >Reverse >sp A5PJF6 HSDL1_BOVIN Inactive hydroxysteroid dehydrogenase-like           | 0.03 |
| 9  | protein 1 OS=Bos taurus GN=HSDL1 PE=2 SV=1                                           |      |
| 10 | >sp O77834 PRDX6_BOVIN Peroxiredoxin-6 OS=Bos taurus GN=PRDX6 PE=1 SV=3              | 0.03 |
| 11 | >sp P07224 PROS_BOVIN Vitamin K-dependent protein S OS=Bos taurus GN=PROS1           | 0.03 |
| 12 | PE=1 SV=1                                                                            |      |
| 13 | >sp P11017 GBB2_BOVIN Guanine nucleotide-binding protein G(I)/G(S)/G(T) subunit      | 0.03 |
| 14 | beta-2 OS=Bos taurus GN=GNB2 PE=2 SV=3                                               |      |
| 15 | >sp Q05443 LUM_BOVIN Lumican OS=Bos taurus GN=LUM PE=1 SV=1                          | 0.03 |
| 16 | >tr G3MZ21 G3MZ21_BOVIN Uncharacterized protein OS=Bos taurus PE=3 SV=1              | 0.03 |
| 17 | >tr F1MRZ8 F1MRZ8_BOVIN Uncharacterized protein OS=Bos taurus GN=PLEK PE=4           | 0.03 |
| 18 | SV=2                                                                                 |      |
| 19 | >tr F1MMK9 F1MMK9_BOVIN Protein AMBP OS=Bos taurus GN=AMBP PE=4 SV=2                 | 0.03 |
| 20 | >Reverse >sp Q0IIE2 SHC1_BOVIN SHC-transforming protein 1 OS=Bos taurus              | 0.03 |
| 21 | GN=SHC1 PE=2 SV=1                                                                    |      |
| 22 | >tr A8YXZ2 A8YXZ2_BOVIN C8G protein OS=Bos taurus GN=C8G PE=2 SV=1                   | 0.03 |
| 23 | >tr G3N2P6 G3N2P6_BOVIN Uncharacterized protein OS=Bos taurus GN=LOC101905591        | 0.03 |
| 24 | PE=3 SV=1                                                                            |      |
| 25 | >tr B0JYP6 B0JYP6_BOVIN IGK protein OS=Bos taurus GN=IGK PE=2 SV=1                   | 0.03 |
| 26 | >sp Q5E9B7 CLIC1_BOVIN Chloride intracellular channel protein 1 OS=Bos taurus        | 0.03 |
| 27 | GN=CLIC1 PE=2 SV=3                                                                   |      |
| 28 | >tr F1MQ37 F1MQ37_BOVIN Uncharacterized protein OS=Bos taurus GN=MYH9 PE=4           | 0.02 |
| 29 | SV=2                                                                                 |      |
| 30 | >sp P07589 FINC_BOVIN Fibronectin OS=Bos taurus GN=FN1 PE=1 SV=4                     | 0.02 |
| 31 | >sp P80209 CATD_BOVIN Cathepsin D OS=Bos taurus GN=CTSD PE=1 SV=2                    | 0.02 |
| 32 | >Reverse >sp Q95LI2 VITRN_BOVIN Vitrin OS=Bos taurus GN=VIT PE=2 SV=2                | 0.02 |
| 33 | >tr K4JBA2 K4JBA2_BOVIN Alpha-2-macroglobulin variant 9 OS=Bos taurus GN=A2M         | 0.02 |
| 34 | PE=2 SV=1                                                                            |      |
| 35 | >tr F1MJK3 F1MJK3_BOVIN Uncharacterized protein OS=Bos taurus GN=LOC506828           | 0.02 |
| 36 | PE=4 SV=2                                                                            |      |
| 37 | >Reverse >tr F1N7U5 F1N7U5_BOVIN Uncharacterized protein OS=Bos taurus               | 0.02 |
| 38 | GN=CCDC57 PE=4 SV=2                                                                  |      |
| 39 | >sp P68432 H31_BOVIN Histone H3.1 OS=Bos taurus PE=1 SV=2                            | 0.02 |
| 40 | >sp Q3MHN2 CO9_BOVIN Complement component C9 OS=Bos taurus GN=C9 PE=2                | 0.02 |
| 41 | SV=1                                                                                 |      |
| 42 | >tr G3MXG6 G3MXG6_BOVIN Uncharacterized protein (Fragment) OS=Bos taurus PE=4        | 0.02 |
| 43 | SV=1                                                                                 |      |
| 44 | >sp P02584 PROF1_BOVIN Profilin-1 OS=Bos taurus GN=PFN1 PE=1 SV=2                    | 0.02 |
| 45 | >tr F1MUY2 F1MUY2_BOVIN Uncharacterized protein OS=Bos taurus GN=KRT6B PE=3          | 0.02 |
| 46 | SV=1                                                                                 |      |
| 47 | >sp P31976 EZRI_BOVIN Ezrin OS=Bos taurus GN=EZR PE=1 SV=2                           | 0.02 |
| 48 | >sp Q6B856 TBB2B_BOVIN Tubulin beta-2B chain OS=Bos taurus GN=TUBB2B PE=1            | 0.02 |
| 49 | SV=2                                                                                 |      |
| 50 | >tr Q3ZC83 Q3ZC83_BOVIN Solute carrier family 29 (Nucleoside transporters), member 1 | 0.02 |
| 51 | OS=Bos taurus GN=SLC29A1 PE=2 SV=1                                                   |      |
| 52 | >tr I7CT57 I7CT57_BOVIN Vitamin D binding protein OS=Bos taurus PE=2 SV=1            | 0.02 |
| 53 | >tr F1MWU9 F1MWU9_BOVIN Uncharacterized protein OS=Bos taurus GN=HSPA6 PE=3          | 0.02 |
| 54 | SV=2                                                                                 |      |
| 55 | >tr A5D7L1 A5D7L1_BOVIN CLEC11A protein OS=Bos taurus GN=CLEC11A PE=2 SV=1           | 0.02 |
| 56 | >sp P56425 CTHL7_BOVIN Cathelicidin-7 OS=Bos taurus GN=CATHL7 PE=2 SV=1              | 0.02 |
| 57 | >tr E1BNS9 E1BNS9_BOVIN L-lactate dehydrogenase OS=Bos taurus GN=LDHC PE=3           | 0.02 |
| 58 |                                                                                      |      |
| 59 |                                                                                      |      |
| 60 |                                                                                      |      |

1  
2  
3  
4  
5  
6  
7  
8  
9  
10  
11  
12  
13  
14  
15  
16  
17  
18  
19  
20  
21  
22  
23  
24  
25  
26  
27  
28  
29  
30  
31  
32  
33  
34  
35  
36  
37  
38  
39  
40  
41  
42  
43  
44  
45  
46  
47  
48  
49  
50  
51  
52  
53  
54  
55  
56  
57  
58  
59  
60

|                                                                                                             |      |
|-------------------------------------------------------------------------------------------------------------|------|
| <b>SV=2</b>                                                                                                 |      |
| >tr E1BJ49 E1BJ49_BOVIN Uncharacterized protein (Fragment) OS=Bos taurus<br>GN=MASP2 PE=3 SV=2              | 0.02 |
| >Reverse >sp P17810 PRPH2_BOVIN Peripherin-2 OS=Bos taurus GN=PRPH2 PE=1<br>SV=1                            | 0.02 |
| >sp A5PKC7 CX049_BOVIN Uncharacterized protein CXorf49 homolog OS=Bos taurus<br>PE=2 SV=1                   | 0.02 |
| >Reverse >sp Q5ICW4 GRB14_BOVIN Growth factor receptor-bound protein 14 OS=Bos<br>taurus GN=GRB14 PE=1 SV=1 | 0.02 |
| >sp P18902 RET4_BOVIN Retinol-binding protein 4 OS=Bos taurus GN=RBP4 PE=1 SV=1                             | 0.02 |
| >tr F1MRD0 F1MRD0_BOVIN Actin, cytoplasmic 1 OS=Bos taurus GN=ACTB PE=3 SV=2                                | 0.02 |
| >tr Q862P9 Q862P9_BOVIN Similar to beta actin (Fragment) OS=Bos taurus PE=2 SV=1                            | 0.02 |
| >sp P62739 ACTA_BOVIN Actin, aortic smooth muscle OS=Bos taurus GN=ACTA2 PE=1<br>SV=1                       | 0.02 |
| >tr K4JB97 K4JB97_BOVIN Alpha-2-macroglobulin variant 4 OS=Bos taurus GN=A2M<br>PE=2 SV=1                   | 0.02 |
| >sp Q3SWW8 TSP4_BOVIN Thrombospondin-4 OS=Bos taurus GN=THBS4 PE=2 SV=1                                     | 0.02 |
| >tr Q148J0 Q148J0_BOVIN Keratin 34 OS=Bos taurus GN=KRT34 PE=2 SV=1                                         | 0.02 |
| >sp P12260 F13A_BOVIN Coagulation factor XIII A chain (Fragment) OS=Bos taurus<br>GN=F13A1 PE=1 SV=2        | 0.02 |
| >tr E1B6Z6 E1B6Z6_BOVIN Uncharacterized protein (Fragment) OS=Bos taurus<br>GN=LCN2 PE=3 SV=2               | 0.02 |
| >tr A5PJJ1 A5PJJ1_BOVIN KRT33A protein OS=Bos taurus GN=KRT33A PE=2 SV=1                                    | 0.02 |
| >Reverse >tr E1BHU6 E1BHU6_BOVIN Uncharacterized protein OS=Bos taurus<br>GN=AFF1 PE=4 SV=2                 | 0.01 |
| >tr Q32PI4 Q32PI4_BOVIN Complement factor I OS=Bos taurus GN=CFI PE=2 SV=1                                  | 0.01 |
| >sp P00741 FA9_BOVIN Coagulation factor IX (Fragment) OS=Bos taurus GN=F9 PE=1<br>SV=1                      | 0.01 |
| >sp Q3MHL4 SAHH_BOVIN Adenosylhomocysteinase OS=Bos taurus GN=AHCY PE=2<br>SV=3                             | 0.01 |
| >sp Q9XSJ4 ENOA_BOVIN Alpha-enolase OS=Bos taurus GN=ENO1 PE=1 SV=4                                         | 0.01 |
| >sp Q2HJ27 MYC_BOVIN Myc proto-oncogene protein OS=Bos taurus GN=MYC PE=2<br>SV=1                           | 0.01 |
| >tr F1MGU7 F1MGU7_BOVIN Fibrinogen gamma-B chain OS=Bos taurus GN=FGG PE=4<br>SV=1                          | 0.01 |
| >sp P81948 TBA4A_BOVIN Tubulin alpha-4A chain OS=Bos taurus GN=TUBA4A PE=1<br>SV=2                          | 0.01 |
| >sp Q2HJ86 TBA1D_BOVIN Tubulin alpha-1D chain OS=Bos taurus GN=TUBA1D PE=1<br>SV=1                          | 0.01 |
| >sp Q3SWY2 ILK_BOVIN Integrin-linked protein kinase OS=Bos taurus GN=ILK PE=2<br>SV=1                       | 0.01 |
| >tr F1N789 F1N789_BOVIN Uncharacterized protein OS=Bos taurus GN=VCL PE=4 SV=1                              | 0.01 |
| >tr K4JBR9 K4JBR9_BOVIN Alpha-2-macroglobulin variant 6 OS=Bos taurus GN=A2M<br>PE=2 SV=1                   | 0.01 |
| >tr A5PK72 A5PK72_BOVIN Putative uncharacterized protein OS=Bos taurus PE=2 SV=1                            | 0.01 |
| >sp Q05718 IBP6_BOVIN Insulin-like growth factor-binding protein 6 OS=Bos taurus<br>GN=IGFBP6 PE=2 SV=2     | 0.01 |
| >tr E1B7Q0 E1B7Q0_BOVIN Protein Hook homolog 3 OS=Bos taurus GN=HOOK3 PE=4<br>SV=1                          | 0.01 |
| >Reverse >tr A5D7Q2 A5D7Q2_BOVIN Putative uncharacterized protein OS=Bos taurus<br>PE=2 SV=1                | 0.01 |
| >sp Q5E9E3 C1QA_BOVIN Complement C1q subcomponent subunit A OS=Bos taurus<br>GN=C1QA PE=2 SV=1              | 0.01 |
| >tr E1BCH9 E1BCH9_BOVIN Uncharacterized protein OS=Bos taurus GN=VCPIP1 PE=4<br>SV=2                        | 0.01 |

|    |                                  |                                                                                         |      |
|----|----------------------------------|-----------------------------------------------------------------------------------------|------|
| 1  |                                  |                                                                                         |      |
| 2  |                                  |                                                                                         |      |
| 3  | >sp Q28085 CFAH_BOVIN            | Complement factor H OS=Bos taurus GN=CFH PE=1 SV=3                                      | 0.01 |
| 4  | >tr Q9TU26 Q9TU26_BOVIN          | Blood-brain barrier large neutral amino acid transporter OS=Bos taurus GN=LAT PE=2 SV=1 | 0.01 |
| 5  | >tr F1MZ78 F1MZ78_BOVIN          | Uncharacterized protein (Fragment) OS=Bos taurus GN=LRRCC1 PE=4 SV=2                    | 0.01 |
| 6  | >sp Q5EAD2 SERA_BOVIN            | D-3-phosphoglycerate dehydrogenase OS=Bos taurus GN=PHGDH PE=2 SV=3                     | 0.01 |
| 7  | >sp P06868 PLMN_BOVIN            | Plasminogen OS=Bos taurus GN=PLG PE=1 SV=2                                              | 0.01 |
| 8  | >tr F1N2R1 F1N2R1_BOVIN          | Uncharacterized protein OS=Bos taurus GN=STOM PE=4 SV=2                                 | 0.01 |
| 9  | >sp P19879 MIME_BOVIN            | Mimecan OS=Bos taurus GN=OGN PE=1 SV=2                                                  | 0.01 |
| 10 | >tr G3MYZ3 G3MYZ3_BOVIN          | Uncharacterized protein OS=Bos taurus GN=AFM PE=4 SV=1                                  | 0.01 |
| 11 | >tr F1MZX6 F1MZX6_BOVIN          | Uncharacterized protein OS=Bos taurus GN=MYH13 PE=4 SV=2                                | 0.01 |
| 12 | >tr E1BAU6 E1BAU6_BOVIN          | Uncharacterized protein OS=Bos taurus GN=INPP5E PE=4 SV=1                               | 0.01 |
| 13 | >tr A6QPX7 A6QPX7_BOVIN          | FGB protein (Fragment) OS=Bos taurus GN=FGB PE=2 SV=1                                   | 0.01 |
| 14 | >tr F1N169 F1N169_BOVIN          | Uncharacterized protein OS=Bos taurus GN=FLNA PE=4 SV=2                                 | 0.01 |
| 15 | >sp P19858 LDHA_BOVIN            | L-lactate dehydrogenase A chain OS=Bos taurus GN=LDHA PE=2 SV=2                         | 0.01 |
| 16 | >sp Q32LP0 URP2_BOVIN            | Fermitin family homolog 3 OS=Bos taurus GN=FERMT3 PE=2 SV=1                             | 0.01 |
| 17 | >tr E1BI98 E1BI98_BOVIN          | Uncharacterized protein OS=Bos taurus GN=COL6A1 PE=4 SV=1                               | 0.01 |
| 18 | >Reverse >sp E1BP74 MARF1_BOVIN  | Meiosis arrest female protein 1 OS=Bos taurus GN=MARF1 PE=3 SV=2                        | 0.01 |
| 19 | >sp Q29443 TRFE_BOVIN            | Serotransferrin OS=Bos taurus GN=TF PE=2 SV=1                                           | 0.01 |
| 20 | >sp P08037 B4GT1_BOVIN           | Beta-1,4-galactosyltransferase 1 OS=Bos taurus GN=B4GALT1 PE=1 SV=3                     | 0.01 |
| 21 | >tr F1N0H9 F1N0H9_BOVIN          | Elastin OS=Bos taurus GN=ELN PE=4 SV=2                                                  | 0.01 |
| 22 | >sp E1BF81 CBG_BOVIN             | Corticosteroid-binding globulin OS=Bos taurus GN=SERPINA6 PE=3 SV=1                     | 0.01 |
| 23 | >tr K4JDR8 K4JDR8_BOVIN          | Alpha-2-macroglobulin variant 5 OS=Bos taurus GN=A2M PE=2 SV=1                          | 0.01 |
| 24 | >sp A2I7N1 SPA35_BOVIN           | Serpin A3-5 OS=Bos taurus GN=SERPINA3-5 PE=3 SV=1                                       | 0.01 |
| 25 | >Reverse >sp Q5EA15 BHE40_BOVIN  | Class E basic helix-loop-helix protein 40 OS=Bos taurus GN=BHLHE40 PE=2 SV=1            | 0.01 |
| 26 | >tr F1MC45 F1MC45_BOVIN          | Complement factor H (Fragment) OS=Bos taurus GN=CFH PE=4 SV=2                           | 0.01 |
| 27 | >tr G3N3E4 G3N3E4_BOVIN          | Uncharacterized protein OS=Bos taurus GN=COL6A3 PE=4 SV=1                               | 0.01 |
| 28 | >Reverse >tr A7E3U1 A7E3U1_BOVIN | Transcription factor RAM2 OS=Bos taurus GN=CDCA7L PE=2 SV=1                             | 0.01 |
| 29 | >tr K4JF16 K4JF16_BOVIN          | Alpha-2-macroglobulin variant 23 OS=Bos taurus GN=A2M PE=2 SV=1                         | 0.01 |
| 30 | >sp P49410 EFTU_BOVIN            | Elongation factor Tu, mitochondrial OS=Bos taurus GN=TUFM PE=1 SV=1                     | 0.01 |
| 31 | >tr B2Z4B1 B2Z4B1_BOVIN          | Angiopoietin-like protein 3 OS=Bos taurus GN=ANGPTL3 PE=2 SV=1                          | 0.01 |
| 32 | >sp Q769I5 MET_BOVIN             | Hepatocyte growth factor receptor OS=Bos taurus GN=MET PE=2 SV=1                        | 0.01 |
| 33 | >tr K4JDS3 K4JDS3_BOVIN          | Alpha-2-macroglobulin variant 10 OS=Bos taurus GN=A2M                                   | 0.01 |
| 34 |                                  |                                                                                         |      |
| 35 |                                  |                                                                                         |      |
| 36 |                                  |                                                                                         |      |
| 37 |                                  |                                                                                         |      |
| 38 |                                  |                                                                                         |      |
| 39 |                                  |                                                                                         |      |
| 40 |                                  |                                                                                         |      |
| 41 |                                  |                                                                                         |      |
| 42 |                                  |                                                                                         |      |
| 43 |                                  |                                                                                         |      |
| 44 |                                  |                                                                                         |      |
| 45 |                                  |                                                                                         |      |
| 46 |                                  |                                                                                         |      |
| 47 |                                  |                                                                                         |      |
| 48 |                                  |                                                                                         |      |
| 49 |                                  |                                                                                         |      |
| 50 |                                  |                                                                                         |      |
| 51 |                                  |                                                                                         |      |
| 52 |                                  |                                                                                         |      |
| 53 |                                  |                                                                                         |      |
| 54 |                                  |                                                                                         |      |
| 55 |                                  |                                                                                         |      |
| 56 |                                  |                                                                                         |      |
| 57 |                                  |                                                                                         |      |
| 58 |                                  |                                                                                         |      |
| 59 |                                  |                                                                                         |      |
| 60 |                                  |                                                                                         |      |

|    |  |  |
|----|--|--|
| 1  |  |  |
| 2  |  |  |
| 3  |  |  |
| 4  |  |  |
| 5  |  |  |
| 6  |  |  |
| 7  |  |  |
| 8  |  |  |
| 9  |  |  |
| 10 |  |  |
| 11 |  |  |
| 12 |  |  |
| 13 |  |  |
| 14 |  |  |
| 15 |  |  |
| 16 |  |  |
| 17 |  |  |
| 18 |  |  |
| 19 |  |  |
| 20 |  |  |
| 21 |  |  |
| 22 |  |  |
| 23 |  |  |
| 24 |  |  |
| 25 |  |  |
| 26 |  |  |
| 27 |  |  |
| 28 |  |  |
| 29 |  |  |
| 30 |  |  |
| 31 |  |  |
| 32 |  |  |
| 33 |  |  |
| 34 |  |  |
| 35 |  |  |
| 36 |  |  |
| 37 |  |  |
| 38 |  |  |
| 39 |  |  |
| 40 |  |  |
| 41 |  |  |
| 42 |  |  |
| 43 |  |  |
| 44 |  |  |
| 45 |  |  |
| 46 |  |  |
| 47 |  |  |
| 48 |  |  |
| 49 |  |  |
| 50 |  |  |
| 51 |  |  |
| 52 |  |  |
| 53 |  |  |
| 54 |  |  |
| 55 |  |  |
| 56 |  |  |
| 57 |  |  |
| 58 |  |  |
| 59 |  |  |
| 60 |  |  |

|                                                                                |  |      |
|--------------------------------------------------------------------------------|--|------|
| PE=2 SV=1                                                                      |  |      |
| >sp Q3SZJ0 ARLY_BOVIN Argininosuccinate lyase OS=Bos taurus GN=ASL PE=2 SV=1   |  | 0.01 |
| >sp Q148H4 KRT81_BOVIN Keratin, type II cuticular Hb1 OS=Bos taurus GN=KRT81   |  | 0.01 |
| PE=2 SV=1                                                                      |  |      |
| >tr Q0VD04 Q0VD04_BOVIN Keratin 85 OS=Bos taurus GN=KRT85 PE=2 SV=1            |  | 0.01 |
| >sp Q148H5 K2C71_BOVIN Keratin, type II cytoskeletal 71 OS=Bos taurus GN=KRT71 |  | 0.01 |
| PE=2 SV=1                                                                      |  |      |
| >sp P00432 CATA_BOVIN Catalase OS=Bos taurus GN=CAT PE=1 SV=3                  |  | 0.01 |
| >tr A6QLD8 A6QLD8_BOVIN ADAMTSL4 protein OS=Bos taurus GN=ADAMTSL4 PE=2        |  | 0.01 |
| SV=1                                                                           |  |      |
| >tr F1MKS5 F1MKS5_BOVIN Histidine-rich glycoprotein OS=Bos taurus GN=HRG PE=4  |  | 0.01 |
| SV=2                                                                           |  |      |
| >sp A7YWK3 K2C73_BOVIN Keratin, type II cytoskeletal 73 OS=Bos taurus GN=KRT73 |  | 0.01 |
| PE=2 SV=1                                                                      |  |      |
| >tr E1BJV0 E1BJV0_BOVIN Uncharacterized protein OS=Bos taurus GN=EHD4 PE=4     |  | 0.01 |
| SV=1                                                                           |  |      |
| >sp Q08D91 K2C75_BOVIN Keratin, type II cytoskeletal 75 OS=Bos taurus GN=KRT75 |  | 0.01 |
| PE=2 SV=1                                                                      |  |      |
| >tr Q9BGU1 Q9BGU1_BOVIN Histidine-rich glycoprotein OS=Bos taurus GN=BTHRG     |  | 0.01 |
| PE=2 SV=1                                                                      |  |      |
| >Reverse >tr F1MTZ8 F1MTZ8_BOVIN Uncharacterized protein OS=Bos taurus         |  | 0.01 |
| GN=ASPSCR1 PE=4 SV=2                                                           |  |      |
| >tr A6QQA8 A6QQA8_BOVIN Sulfhydryl oxidase OS=Bos taurus GN=QSOX1 PE=2 SV=1    |  | 0.01 |
| >tr Q08DL0 Q08DL0_BOVIN SLC3A2 protein OS=Bos taurus GN=SLC3A2 PE=2 SV=1       |  | 0.01 |

## Sample 2

| Description                                                                  | NpSp<br>C |
|------------------------------------------------------------------------------|-----------|
| >sp P01966 HBA_BOVIN Hemoglobin subunit alpha OS=Bos taurus GN=HBA PE=1 SV=2 | 13.13     |
| >tr B0JYN6 B0JYN6_BOVIN Alpha-2-HS-glycoprotein OS=Bos taurus GN=AHSG PE=2   | 11.53     |
| SV=1                                                                         |           |
| >sp P81644 APOA2_BOVIN Apolipoprotein A-II OS=Bos taurus GN=APOA2 PE=1 SV=2  | 7.79      |
| >sp ALBU_BOVIN (Common contaminant protein)                                  | 7.79      |
| >sp P02081 HBBF_BOVIN Hemoglobin fetal subunit beta OS=Bos taurus PE=1 SV=1  | 6.96      |
| >sp P34955 A1AT_BOVIN Alpha-1-antiproteinase OS=Bos taurus GN=SERPINA1 PE=1  | 5.06      |
| SV=1                                                                         |           |
| >sp P15497 APOA1_BOVIN Apolipoprotein A-I OS=Bos taurus GN=APOA1 PE=1 SV=3   | 4.47      |
| >tr Q9TRP4 Q9TRP4_BOVIN Fetuin (Fragment) OS=Bos taurus PE=1 SV=1            | 2.02      |
| >sp K2C1_HUMAN (Common contaminant protein)                                  | 1.09      |
| >sp K1C9_HUMAN (Common contaminant protein)                                  | 1.07      |
| >tr G3N0S9 G3N0S9_BOVIN Uncharacterized protein OS=Bos taurus GN=LOC515150   | 0.98      |
| PE=4 SV=1                                                                    |           |
| >sp Q03247 APOE_BOVIN Apolipoprotein E OS=Bos taurus GN=APOE PE=2 SV=1       | 0.95      |
| >sp K1C10_HUMAN (Common contaminant protein)                                 | 0.94      |
| >tr B0JYQ0 B0JYQ0_BOVIN ALB protein OS=Bos taurus GN=ALB PE=2 SV=1           | 0.94      |
| >sp HBA_HUMAN (Common contaminant protein)                                   | 0.90      |
| >tr E1BI48 E1BI48_BOVIN Uncharacterized protein OS=Bos taurus GN=KRTDAP PE=4 | 0.81      |
| SV=1                                                                         |           |
| >sp P19034 APOC2_BOVIN Apolipoprotein C-II OS=Bos taurus GN=APOC2 PE=1 SV=2  | 0.80      |
| >sp O46375 TTHY_BOVIN Transthyretin OS=Bos taurus GN=TTR PE=1 SV=1           | 0.78      |
| >sp Q3SZ57 FETA_BOVIN Alpha-fetoprotein OS=Bos taurus GN=AFP PE=2 SV=1       | 0.78      |
| >sp Q3SZR3 A1AG_BOVIN Alpha-1-acid glycoprotein OS=Bos taurus GN=ORM1 PE=2   | 0.78      |
| SV=1                                                                         |           |
| >sp P0C0S9 H2A1_BOVIN Histone H2A type 1 OS=Bos taurus PE=1 SV=2             | 0.74      |

|                                                                                                       |      |
|-------------------------------------------------------------------------------------------------------|------|
| >tr F1MSZ6 F1MSZ6_BOVIN Antithrombin-III OS=Bos taurus GN=SERPINC1 PE=3 SV=1                          | 0.72 |
| >tr A6QPP9 A6QPP9_BOVIN PF4 protein OS=Bos taurus GN=PF4 PE=3 SV=1                                    | 0.72 |
| >tr A6QPP2 A6QPP2_BOVIN SERPIND1 protein OS=Bos taurus GN=SERPIND1 PE=2 SV=1                          | 0.69 |
| >sp P19035 APOC3_BOVIN Apolipoprotein C-III OS=Bos taurus GN=APOC3 PE=1 SV=2                          | 0.68 |
| >sp Q29443 TRFE_BOVIN Serotransferrin OS=Bos taurus GN=TF PE=2 SV=1                                   | 0.67 |
| >sp Q58D62 FETUB_BOVIN Fetuin-B OS=Bos taurus GN=FETUB PE=2 SV=1                                      | 0.65 |
| >sp Q2KIS7 TETN_BOVIN Tetranectin OS=Bos taurus GN=CLEC3B PE=2 SV=1                                   | 0.63 |
| >sp P00735 THRB_BOVIN Prothrombin OS=Bos taurus GN=F2 PE=1 SV=2                                       | 0.63 |
| >tr Q7M2S7 Q7M2S7_BOVIN Salivary protein P-B (Fragment) OS=Bos taurus PE=1 SV=1                       | 0.61 |
| >sp P60712 ACTB_BOVIN Actin, cytoplasmic 1 OS=Bos taurus GN=ACTB PE=1 SV=1                            | 0.58 |
| >sp K22E_HUMAN (Common contaminant protein)                                                           | 0.58 |
| >sp Q3MHN5 VTDB_BOVIN Vitamin D-binding protein OS=Bos taurus GN=GC PE=2 SV=1                         | 0.53 |
| >sp Q3T052 ITIH4_BOVIN Inter-alpha-trypsin inhibitor heavy chain H4 OS=Bos taurus GN=ITIH4 PE=1 SV=1  | 0.51 |
| >sp Q7SIH1 A2MG_BOVIN Alpha-2-macroglobulin OS=Bos taurus GN=A2M PE=1 SV=2                            | 0.49 |
| >tr Q3SZH5 Q3SZH5_BOVIN Angiotensinogen OS=Bos taurus GN=AGT PE=2 SV=1                                | 0.47 |
| >tr F1MNV4 F1MNV4_BOVIN Inter-alpha-trypsin inhibitor heavy chain H2 OS=Bos taurus GN=ITIH2 PE=4 SV=2 | 0.47 |
| >tr E1BIG6 E1BIG6_BOVIN Uncharacterized protein OS=Bos taurus GN=TFRC PE=4 SV=2                       | 0.45 |
| >tr F1MNV5 F1MNV5_BOVIN Kininogen-1 OS=Bos taurus GN=KNG1 PE=4 SV=2                                   | 0.43 |
| >sp Q2UVX4 CO3_BOVIN Complement C3 OS=Bos taurus GN=C3 PE=1 SV=2                                      | 0.43 |
| >tr Q3ZBS7 Q3ZBS7_BOVIN Uncharacterized protein OS=Bos taurus GN=VTN PE=2 SV=1                        | 0.42 |
| >sp Q32PJ2 APOA4_BOVIN Apolipoprotein A-IV OS=Bos taurus GN=APOA4 PE=2 SV=1                           | 0.41 |
| >tr Q27984 Q27984_BOVIN Alpha1-antichymotrypsin isoform pHHK12 (Fragment) OS=Bos taurus PE=2 SV=1     | 0.39 |
| >sp P17697 CLUS_BOVIN Clusterin OS=Bos taurus GN=CLU PE=1 SV=1                                        | 0.38 |
| >sp P17690 APOH_BOVIN Beta-2-glycoprotein 1 OS=Bos taurus GN=APOH PE=1 SV=4                           | 0.37 |
| >sp P02769 ALBU_BOVIN Serum albumin OS=Bos taurus GN=ALB PE=1 SV=4                                    | 0.37 |
| >sp P28800 A2AP_BOVIN Alpha-2-antiplasmin OS=Bos taurus GN=SERPINF2 PE=1 SV=2                         | 0.35 |
| >sp P37141 GPX3_BOVIN Glutathione peroxidase 3 OS=Bos taurus GN=GPX3 PE=2 SV=2                        | 0.34 |
| >sp P00978 AMBIP_BOVIN Protein AMBP OS=Bos taurus GN=AMBIP PE=1 SV=2                                  | 0.31 |
| >sp TRYP_PIG (Common contaminant protein)                                                             | 0.30 |
| >tr E1BIK4 E1BIK4_BOVIN Uncharacterized protein OS=Bos taurus GN=PPBP PE=3 SV=1                       | 0.29 |
| >sp Q9TTE1 SPA31_BOVIN Serpin A3-1 OS=Bos taurus GN=SERPINA3-1 PE=1 SV=3                              | 0.29 |
| >sp Q9N2I2 IPSP_BOVIN Plasma serine protease inhibitor OS=Bos taurus GN=SERPINA5 PE=1 SV=1            | 0.28 |
| >sp P56652 ITIH3_BOVIN Inter-alpha-trypsin inhibitor heavy chain H3 OS=Bos taurus GN=ITIH3 PE=1 SV=2  | 0.28 |
| >sp Q2KJF1 A1BG_BOVIN Alpha-1B-glycoprotein OS=Bos taurus GN=A1BG PE=1 SV=1                           | 0.27 |
| >tr F1N1I6 F1N1I6_BOVIN Gelsolin OS=Bos taurus GN=GSN PE=4 SV=1                                       | 0.26 |
| >sp P10096 G3P_BOVIN Glyceraldehyde-3-phosphate dehydrogenase OS=Bos taurus GN=GAPDH PE=1 SV=4        | 0.25 |
| >tr G1K122 G1K122_BOVIN Retinol-binding protein 4 OS=Bos taurus GN=RBP4 PE=3 SV=1                     | 0.25 |
| >tr J9QD97 J9QD97_BOVIN Periostin variant 9 OS=Bos taurus PE=2 SV=1                                   | 0.25 |
| >sp P12763 FETUA_BOVIN Alpha-2-HS-glycoprotein OS=Bos taurus GN=AHSG PE=1 SV=2                        | 0.25 |
| >sp Q3SYR5 APOC4_BOVIN Apolipoprotein C-IV OS=Bos taurus GN=APOC4 PE=2 SV=1                           | 0.24 |

|    |                         |                                                                                      |      |
|----|-------------------------|--------------------------------------------------------------------------------------|------|
| 1  |                         |                                                                                      |      |
| 2  |                         |                                                                                      |      |
| 3  | >tr E1BJF9 E1BJF9_BOVIN | Serum amyloid A protein OS=Bos taurus GN=SAA3 PE=3 SV=1                              | 0.24 |
| 4  |                         |                                                                                      |      |
| 5  | >tr D5MTL9 D5MTL9_BOVIN | Glycophorin B variant 1 OS=Bos taurus GN=gypb PE=4 SV=1                              | 0.22 |
| 6  |                         |                                                                                      |      |
| 7  | >sp Q3SZV7 HEMO_BOVIN   | Hemopexin OS=Bos taurus GN=HPX PE=2 SV=1                                             | 0.22 |
| 8  |                         |                                                                                      |      |
| 9  | >sp Q3T0P6 PGK1_BOVIN   | Phosphoglycerate kinase 1 OS=Bos taurus GN=PGK1 PE=2 SV=3                            | 0.21 |
| 10 |                         |                                                                                      |      |
| 11 | >tr Q3ZBQ9 Q3ZBQ9_BOVIN | APOM protein OS=Bos taurus GN=APOM PE=4 SV=1                                         | 0.20 |
| 12 |                         |                                                                                      |      |
| 13 | >tr F1MC11 F1MC11_BOVIN | Keratin, type I cytoskeletal 14 OS=Bos taurus GN=KRT14 PE=3 SV=2                     | 0.19 |
| 14 |                         |                                                                                      |      |
| 15 | >sp P04815 BPT2_BOVIN   | Spleen trypsin inhibitor I OS=Bos taurus PE=1 SV=2                                   | 0.19 |
| 16 |                         |                                                                                      |      |
| 17 | >sp Q3T149 HSPB1_BOVIN  | Heat shock protein beta-1 OS=Bos taurus GN=HSPB1 PE=2 SV=1                           | 0.19 |
| 18 |                         |                                                                                      |      |
| 19 | >tr Q9TS73 Q9TS73_BOVIN | Trypsin inhibitor (Fragments) OS=Bos taurus PE=1 SV=1                                | 0.19 |
| 20 |                         |                                                                                      |      |
| 21 | >sp P81187 CFAB_BOVIN   | Complement factor B OS=Bos taurus GN=CFB PE=1 SV=2                                   | 0.19 |
| 22 |                         |                                                                                      |      |
| 23 | >sp P02672 FIBA_BOVIN   | Fibrinogen alpha chain OS=Bos taurus GN=FGA PE=1 SV=5                                | 0.18 |
| 24 |                         |                                                                                      |      |
| 25 | >tr G5E604 G5E604_BOVIN | Uncharacterized protein (Fragment) OS=Bos taurus PE=4 SV=1                           | 0.18 |
| 26 |                         |                                                                                      |      |
| 27 | >tr F6S1Q0 F6S1Q0_BOVIN | Uncharacterized protein OS=Bos taurus GN=KRT18 PE=3 SV=1                             | 0.18 |
| 28 |                         |                                                                                      |      |
| 29 | >sp P60661 MYL6_BOVIN   | Myosin light polypeptide 6 OS=Bos taurus GN=MYL6 PE=2 SV=2                           | 0.18 |
| 30 |                         |                                                                                      |      |
| 31 | >tr F1MHE4 F1MHE4_BOVIN | Uncharacterized protein OS=Bos taurus GN=PLVAP PE=4 SV=1                             | 0.17 |
| 32 |                         |                                                                                      |      |
| 33 | >sp P61223 RAP1B_BOVIN  | Ras-related protein Rap-1b OS=Bos taurus GN=RAP1B PE=2 SV=1                          | 0.17 |
| 34 |                         |                                                                                      |      |
| 35 | >tr E1BH06 E1BH06_BOVIN | Uncharacterized protein OS=Bos taurus GN=C4A PE=4 SV=2                               | 0.17 |
| 36 |                         |                                                                                      |      |
| 37 | >sp P02662 CASA1_BOVIN  | Alpha-S1-casein OS=Bos taurus GN=CSN1S1 PE=1 SV=2                                    | 0.16 |
| 38 |                         |                                                                                      |      |
| 39 | >tr F1MYN5 F1MYN5_BOVIN | Fibulin-1 OS=Bos taurus GN=FBLN1 PE=3 SV=2                                           | 0.16 |
| 40 |                         |                                                                                      |      |
| 41 | >tr Q1RMN9 Q1RMN9_BOVIN | C4b-binding protein alpha-like OS=Bos taurus GN=LOC510860 PE=2 SV=1                  | 0.16 |
| 42 |                         |                                                                                      |      |
| 43 | >sp Q2KJH6 SERPH_BOVIN  | Serpin H1 OS=Bos taurus GN=SERPINH1 PE=2 SV=1                                        | 0.16 |
| 44 |                         |                                                                                      |      |
| 45 | >tr I7CT57 I7CT57_BOVIN | Vitamin D binding protein OS=Bos taurus PE=2 SV=1                                    | 0.15 |
| 46 |                         |                                                                                      |      |
| 47 | >sp Q2M2T1 H2B1K_BOVIN  | Histone H2B type 1-K OS=Bos taurus GN=HIST1H2BK PE=1 SV=3                            | 0.15 |
| 48 |                         |                                                                                      |      |
| 49 | >tr E1BMJ0 E1BMJ0_BOVIN | Uncharacterized protein OS=Bos taurus GN=SERPING1 PE=3 SV=2                          | 0.15 |
| 50 |                         |                                                                                      |      |
| 51 | >tr A5D984 A5D984_BOVIN | Pyruvate kinase OS=Bos taurus GN=PKM2 PE=2 SV=1                                      | 0.14 |
| 52 |                         |                                                                                      |      |
| 53 | >sp P68103 EF1A1_BOVIN  | Elongation factor 1-alpha 1 OS=Bos taurus GN=EEF1A1 PE=2 SV=1                        | 0.14 |
| 54 |                         |                                                                                      |      |
| 55 | >sp Q95121 PEDF_BOVIN   | Pigment epithelium-derived factor OS=Bos taurus GN=SERPINF1 PE=1 SV=1                | 0.14 |
| 56 |                         |                                                                                      |      |
| 57 | >tr G5E513 G5E513_BOVIN | Uncharacterized protein (Fragment) OS=Bos taurus PE=4 SV=1                           | 0.13 |
| 58 |                         |                                                                                      |      |
| 59 | >tr G3N1Y3 G3N1Y3_BOVIN | Uncharacterized protein (Fragment) OS=Bos taurus PE=3 SV=1                           | 0.13 |
| 60 |                         |                                                                                      |      |
|    | >sp P01035 CYTC_BOVIN   | Cystatin-C OS=Bos taurus GN=CST3 PE=1 SV=2                                           | 0.13 |
|    | >tr O77679 O77679_BOVIN | Glyceraldehyde 3-phosphate dehydrogenase (Fragment) OS=Bos taurus GN=G3PDH PE=2 SV=1 | 0.12 |
|    | >tr F1N2P8 F1N2P8_BOVIN | Insulin-like growth factor-binding protein 2 OS=Bos taurus GN=IGFBP2 PE=4 SV=2       | 0.12 |
|    | >tr Q32PI4 Q32PI4_BOVIN | Complement factor I OS=Bos taurus GN=CFI PE=2 SV=1                                   | 0.12 |
|    | >sp P62803 H4_BOVIN     | Histone H4 OS=Bos taurus PE=1 SV=2                                                   | 0.11 |
|    | >tr F1MK19 F1MK19_BOVIN | L-lactate dehydrogenase OS=Bos taurus GN=LDHC PE=3                                   | 0.11 |

|    |                                                                                       |      |
|----|---------------------------------------------------------------------------------------|------|
| 1  | SV=1                                                                                  |      |
| 2  |                                                                                       |      |
| 3  |                                                                                       |      |
| 4  | >Reverse >tr E1BIG0 E1BIG0_BOVIN Uncharacterized protein OS=Bos taurus                | 0.11 |
| 5  | GN=METTL6 PE=4 SV=1                                                                   |      |
| 6  | >tr Q3SZZ9 Q3SZZ9_BOVIN FGG protein OS=Bos taurus GN=FGG PE=2 SV=1                    | 0.11 |
| 7  | >sp P02070 HBB_BOVIN Hemoglobin subunit beta OS=Bos taurus GN=HBB PE=1 SV=1           | 0.11 |
| 8  | >tr A8R3Y9 A8R3Y9_BOVIN PTBP2 protein OS=Bos taurus GN=PTBP2 PE=2 SV=1                | 0.11 |
| 9  | >tr F1MCF8 F1MCF8_BOVIN Uncharacterized protein OS=Bos taurus GN=IGLL1 PE=4           | 0.10 |
| 10 | SV=2                                                                                  |      |
| 11 | >sp Q27975 HS71A_BOVIN Heat shock 70 kDa protein 1A OS=Bos taurus GN=HSPA1A           | 0.10 |
| 12 | PE=1 SV=2                                                                             |      |
| 13 | >tr G3X6N3 G3X6N3_BOVIN Serotransferrin OS=Bos taurus GN=TF PE=4 SV=1                 | 0.09 |
| 14 | >tr E1BNR0 E1BNR0_BOVIN Uncharacterized protein OS=Bos taurus GN=APOB PE=4            | 0.09 |
| 15 | SV=2                                                                                  |      |
| 16 | >tr Q58DL9 Q58DL9_BOVIN Phospholipid transfer protein OS=Bos taurus GN=PLTP           | 0.09 |
| 17 | PE=2 SV=1                                                                             |      |
| 18 | >sp P02676 FIBB_BOVIN Fibrinogen beta chain OS=Bos taurus GN=FGB PE=1 SV=2            | 0.09 |
| 19 | >tr E1B726 E1B726_BOVIN Plasminogen OS=Bos taurus GN=PLG PE=3 SV=2                    | 0.09 |
| 20 | >sp Q28178 TSP1_BOVIN Thrombospondin-1 OS=Bos taurus GN=THBS1 PE=2 SV=2               | 0.09 |
| 21 | >sp Q77834 PRDX6_BOVIN Peroxiredoxin-6 OS=Bos taurus GN=PRDX6 PE=1 SV=3               | 0.09 |
| 22 | >Reverse >tr G3MZE1 G3MZE1_BOVIN Uncharacterized protein (Fragment) OS=Bos            | 0.09 |
| 23 | taurus GN=BTBD18 PE=4 SV=1                                                            |      |
| 24 | >tr A6QLB3 A6QLB3_BOVIN ITGA2B protein OS=Bos taurus GN=ITGA2B PE=2 SV=1              | 0.09 |
| 25 | >sp P79105 S10AC_BOVIN Protein S100-A12 OS=Bos taurus GN=S100A12 PE=1 SV=3            | 0.08 |
| 26 | >sp P01045 KNG2_BOVIN Kininogen-2 OS=Bos taurus GN=KNG2 PE=1 SV=1                     | 0.08 |
| 27 | >sp Q2KIT0 HP20_BOVIN Protein HP-20 homolog OS=Bos taurus PE=2 SV=1                   | 0.08 |
| 28 | >tr E1BGJ4 E1BGJ4_BOVIN Uncharacterized protein OS=Bos taurus GN=MAN2A2 PE=4          | 0.08 |
| 29 | SV=1                                                                                  |      |
| 30 | >sp Q05443 LUM_BOVIN Lumican OS=Bos taurus GN=LUM PE=1 SV=1                           | 0.08 |
| 31 | >sp P27674 GTR1_BOVIN Solute carrier family 2, facilitated glucose transporter member | 0.08 |
| 32 | 1 OS=Bos taurus GN=SLC2A1 PE=2 SV=1                                                   |      |
| 33 | >sp Q5E9F5 TAGL2_BOVIN Transgelin-2 OS=Bos taurus GN=TAGLN2 PE=2 SV=3                 | 0.08 |
| 34 | >sp Q3T0I5 FIS1_BOVIN Mitochondrial fission 1 protein OS=Bos taurus GN=FIS1 PE=2      | 0.08 |
| 35 | SV=1                                                                                  |      |
| 36 | >sp Q9TT36 THBG_BOVIN Thyroxine-binding globulin OS=Bos taurus GN=SERPINA7            | 0.07 |
| 37 | PE=2 SV=1                                                                             |      |
| 38 | >tr Q9XSW5 Q9XSW5_BOVIN Band 3 protein OS=Bos taurus GN=BEB3 PE=2 SV=1                | 0.07 |
| 39 | >sp Q95122 CD14_BOVIN Monocyte differentiation antigen CD14 OS=Bos taurus             | 0.07 |
| 40 | GN=CD14 PE=2 SV=2                                                                     |      |
| 41 | >tr A1L5B6 A1L5B6_BOVIN Annexin OS=Bos taurus GN=ANXA5 PE=2 SV=1                      | 0.07 |
| 42 | >sp P62935 PPIA_BOVIN Peptidyl-prolyl cis-trans isomerase A OS=Bos taurus GN=PPIA     | 0.07 |
| 43 | PE=1 SV=2                                                                             |      |
| 44 | >sp Q5E9F7 COF1_BOVIN Cofilin-1 OS=Bos taurus GN=CFL1 PE=2 SV=3                       | 0.07 |
| 45 | >tr J9ZW47 J9ZW47_BOVIN Integrin beta OS=Bos taurus PE=2 SV=1                         | 0.07 |
| 46 | >tr E1BJK2 E1BJK2_BOVIN Uncharacterized protein OS=Bos taurus GN=TUBB1 PE=3           | 0.07 |
| 47 | SV=1                                                                                  |      |
| 48 | >sp A6QQ91 RASL3_BOVIN RAS protein activator like-3 OS=Bos taurus GN=RASAL3           | 0.06 |
| 49 | PE=2 SV=1                                                                             |      |
| 50 | >sp P01044 KNG1_BOVIN Kininogen-1 OS=Bos taurus GN=KNG1 PE=1 SV=1                     | 0.06 |
| 51 | >tr A4FV94 A4FV94_BOVIN KRT6A protein OS=Bos taurus GN=KRT6A PE=2 SV=1                | 0.06 |
| 52 | >sp P81947 TBA1B_BOVIN Tubulin alpha-1B chain OS=Bos taurus PE=1 SV=2                 | 0.06 |
| 53 | >sp Q0VCM5 ITIH1_BOVIN Inter-alpha-trypsin inhibitor heavy chain H1 OS=Bos taurus     | 0.06 |
| 54 | GN=ITIH1 PE=2 SV=1                                                                    |      |
| 55 | >sp P13135 CPNS1_BOVIN Calpain small subunit 1 OS=Bos taurus GN=CAPNS1 PE=2           | 0.06 |
| 56 | SV=1                                                                                  |      |
| 57 | >Reverse >tr E1BHH6 E1BHH6_BOVIN Uncharacterized protein OS=Bos taurus                | 0.06 |
| 58 |                                                                                       |      |
| 59 |                                                                                       |      |
| 60 |                                                                                       |      |



1  
2  
3  
4  
5  
6  
7  
8  
9  
10  
11  
12  
13  
14  
15  
16  
17  
18  
19  
20  
21  
22  
23  
24  
25  
26  
27  
28  
29  
30  
31  
32  
33  
34  
35  
36  
37  
38  
39  
40  
41  
42  
43  
44  
45  
46  
47  
48  
49  
50  
51  
52  
53  
54  
55  
56  
57  
58  
59  
60

|                                                                                                                        |      |
|------------------------------------------------------------------------------------------------------------------------|------|
| <b>GN=PODN PE=4 SV=2</b>                                                                                               |      |
| >sp P11017 GBB2_BOVIN Guanine nucleotide-binding protein G(I)/G(S)/G(T) subunit beta-2 OS=Bos taurus GN=GNB2 PE=2 SV=3 | 0.06 |
| >sp Q2TB10 LBP_BOVIN Lipopolysaccharide-binding protein OS=Bos taurus GN=LBP PE=2 SV=1                                 | 0.06 |
| >tr Q32T06 Q32T06_BOVIN Endopin 2C OS=Bos taurus PE=2 SV=1                                                             | 0.06 |
| >tr G3MXG6 G3MXG6_BOVIN Uncharacterized protein (Fragment) OS=Bos taurus PE=4 SV=1                                     | 0.06 |
| >sp P33072 LYOX_BOVIN Protein-lysine 6-oxidase OS=Bos taurus GN=LOX PE=1 SV=3                                          | 0.06 |
| >sp Q2KIG3 CBPB2_BOVIN Carboxypeptidase B2 OS=Bos taurus GN=CPB2 PE=1 SV=1                                             | 0.05 |
| >sp P04985-3 ELN_BOVIN Isoform 3 of Elastin OS=Bos taurus GN=ELN                                                       | 0.05 |
| >tr G3MYZ3 G3MYZ3_BOVIN Uncharacterized protein OS=Bos taurus GN=AFM PE=4 SV=1                                         | 0.05 |
| >tr F1N013 F1N013_BOVIN Coagulation factor V OS=Bos taurus GN=F5 PE=4 SV=2                                             | 0.05 |
| >sp P54229 CTHL5_BOVIN Cathelicidin-5 OS=Bos taurus GN=CATHL5 PE=1 SV=1                                                | 0.05 |
| >Reverse >tr E1BH55 E1BH55_BOVIN Uncharacterized protein OS=Bos taurus GN=LOC504623 PE=3 SV=2                          | 0.05 |
| >Reverse >sp A5PJF6 HSDL1_BOVIN Inactive hydroxysteroid dehydrogenase-like protein 1 OS=Bos taurus GN=HSDL1 PE=2 SV=1  | 0.05 |
| >sp A4IF97 ML12B_BOVIN Myosin regulatory light chain 12B OS=Bos taurus GN=MYL12B PE=2 SV=1                             | 0.04 |
| >sp Q9XSJ4 ENOA_BOVIN Alpha-enolase OS=Bos taurus GN=ENO1 PE=1 SV=4                                                    | 0.04 |
| >tr K4JR71 K4JR71_BOVIN Alpha-2-macroglobulin variant 2 OS=Bos taurus GN=A2M PE=2 SV=1                                 | 0.04 |
| >sp P01044-2 KNG1_BOVIN Isoform LMW of Kininogen-1 OS=Bos taurus GN=KNG1                                               | 0.04 |
| >tr F1MRZ8 F1MRZ8_BOVIN Uncharacterized protein OS=Bos taurus GN=PLEK PE=4 SV=2                                        | 0.04 |
| >tr A5PJ69 A5PJ69_BOVIN SERPINA10 protein OS=Bos taurus GN=SERPINA10 PE=2 SV=1                                         | 0.04 |
| >sp P84080 ARF1_BOVIN ADP-ribosylation factor 1 OS=Bos taurus GN=ARF1 PE=1 SV=2                                        | 0.04 |
| >sp Q3MHN2 CO9_BOVIN Complement component C9 OS=Bos taurus GN=C9 PE=2 SV=1                                             | 0.04 |
| >sp P18902 RET4_BOVIN Retinol-binding protein 4 OS=Bos taurus GN=RBP4 PE=1 SV=1                                        | 0.04 |
| >tr A4IFN4 A4IFN4_BOVIN LOC615589 protein OS=Bos taurus GN=LOC615589 PE=2 SV=1                                         | 0.04 |
| >tr F1MI18 F1MI18_BOVIN Uncharacterized protein OS=Bos taurus GN=LOC506828 PE=4 SV=2                                   | 0.04 |
| >Reverse >tr F1N4D7 F1N4D7_BOVIN Uncharacterized protein (Fragment) OS=Bos taurus GN=LOC524642 PE=4 SV=2               | 0.04 |
| >sp Q3ZC07 ACTC_BOVIN Actin, alpha cardiac muscle 1 OS=Bos taurus GN=ACTC1 PE=2 SV=1                                   | 0.04 |
| >tr F1N2R1 F1N2R1_BOVIN Uncharacterized protein OS=Bos taurus GN=STOM PE=4 SV=2                                        | 0.04 |
| >sp P20959 IBP3_BOVIN Insulin-like growth factor-binding protein 3 OS=Bos taurus GN=IGFBP3 PE=1 SV=3                   | 0.04 |
| >tr F1MDH3 F1MDH3_BOVIN Uncharacterized protein (Fragment) OS=Bos taurus GN=TLN1 PE=4 SV=2                             | 0.04 |
| >sp Q9BGI3 PRDX2_BOVIN Peroxiredoxin-2 OS=Bos taurus GN=PRDX2 PE=2 SV=1                                                | 0.04 |
| >sp P19879 MIME_BOVIN Mimecan OS=Bos taurus GN=OGN PE=1 SV=2                                                           | 0.04 |
| >sp E1BF81 CBG_BOVIN Corticosteroid-binding globulin OS=Bos taurus GN=SERPINA6 PE=3 SV=1                               | 0.04 |
| >tr A1L528 A1L528_BOVIN RAB1A, member RAS oncogene family OS=Bos taurus GN=RAB1A PE=2 SV=1                             | 0.04 |

|    |                                                                                                                         |      |
|----|-------------------------------------------------------------------------------------------------------------------------|------|
| 1  | >tr F1MKS5 F1MKS5_BOVIN Histidine-rich glycoprotein OS=Bos taurus GN=HRG PE=4 SV=2                                      | 0.04 |
| 2  |                                                                                                                         |      |
| 3  | >sp Q2TA29 RB11A_BOVIN Ras-related protein Rab-11A OS=Bos taurus GN=RAB11A PE=2 SV=3                                    | 0.04 |
| 4  |                                                                                                                         |      |
| 5  | >sp P02666 CASB_BOVIN Beta-casein OS=Bos taurus GN=CSN2 PE=1 SV=2                                                       | 0.03 |
| 6  | >tr Q3ZC83 Q3ZC83_BOVIN Solute carrier family 29 (Nucleoside transporters), member 1 OS=Bos taurus GN=SLC29A1 PE=2 SV=1 | 0.03 |
| 7  |                                                                                                                         |      |
| 8  | >tr G3MZ21 G3MZ21_BOVIN Uncharacterized protein OS=Bos taurus PE=3 SV=1                                                 | 0.03 |
| 9  | >tr G3N2D7 G3N2D7_BOVIN Uncharacterized protein (Fragment) OS=Bos taurus GN=IGLL1 PE=4 SV=1                             | 0.03 |
| 10 |                                                                                                                         |      |
| 11 | >sp P31976 EZRI_BOVIN Ezrin OS=Bos taurus GN=EZR PE=1 SV=2                                                              | 0.03 |
| 12 | >tr F1MD83 F1MD83_BOVIN Platelet factor 4 OS=Bos taurus GN=PF4 PE=3 SV=1                                                | 0.03 |
| 13 | >sp P01888 B2MG_BOVIN Beta-2-microglobulin OS=Bos taurus GN=B2M PE=1 SV=2                                               | 0.03 |
| 14 | >sp Q5XQN5 K2C5_BOVIN Keratin, type II cytoskeletal 5 OS=Bos taurus GN=KRT5 PE=1 SV=1                                   | 0.03 |
| 15 |                                                                                                                         |      |
| 16 | >sp Q28065 C4BPA_BOVIN C4b-binding protein alpha chain OS=Bos taurus GN=C4BPA PE=2 SV=1                                 | 0.03 |
| 17 | >Reverse >tr G5E5R6 G5E5R6_BOVIN Uncharacterized protein OS=Bos taurus GN=PARD6B PE=4 SV=1                              | 0.03 |
| 18 | >tr K4JB97 K4JB97_BOVIN Alpha-2-macroglobulin variant 4 OS=Bos taurus GN=A2M PE=2 SV=1                                  | 0.03 |
| 19 |                                                                                                                         |      |
| 20 | >sp P19120 HSP7C_BOVIN Heat shock cognate 71 kDa protein OS=Bos taurus GN=HSPA8 PE=1 SV=2                               | 0.03 |
| 21 | >Reverse >tr E1BMP3 E1BMP3_BOVIN Uncharacterized protein OS=Bos taurus GN=MYLK3 PE=4 SV=2                               | 0.03 |
| 22 | >tr F1MQ37 F1MQ37_BOVIN Uncharacterized protein OS=Bos taurus GN=MYH9 PE=4 SV=2                                         | 0.03 |
| 23 |                                                                                                                         |      |
| 24 | >tr O77765 O77765_BOVIN Superficial zone protein (Fragment) OS=Bos taurus PE=2 SV=1                                     | 0.03 |
| 25 |                                                                                                                         |      |
| 26 | >sp Q3S8W8 TSP4_BOVIN Thrombospondin-4 OS=Bos taurus GN=THBS4 PE=2 SV=1                                                 | 0.03 |
| 27 | >sp P07589 FINC_BOVIN Fibronectin OS=Bos taurus GN=FN1 PE=1 SV=4                                                        | 0.03 |
| 28 | >sp Q6B411 LYSM_BOVIN Lysozyme C, milk isozyme OS=Bos taurus PE=2 SV=1                                                  | 0.03 |
| 29 | >tr O97941 O97941_BOVIN Complement component 3 (Fragment) OS=Bos taurus PE=2 SV=1                                       | 0.03 |
| 30 | >tr E1BCW0 E1BCW0_BOVIN Uncharacterized protein (Fragment) OS=Bos taurus GN=HGFAF PE=3 SV=2                             | 0.03 |
| 31 |                                                                                                                         |      |
| 32 | >sp Q2T9S0 TBB3_BOVIN Tubulin beta-3 chain OS=Bos taurus GN=TUBB3 PE=2 SV=1                                             | 0.03 |
| 33 | >tr F1MSW0 F1MSW0_BOVIN Uncharacterized protein OS=Bos taurus GN=MEP1A PE=3 SV=2                                        | 0.03 |
| 34 |                                                                                                                         |      |
| 35 | >sp Q3SWY2 ILK_BOVIN Integrin-linked protein kinase OS=Bos taurus GN=ILK PE=2 SV=1                                      | 0.03 |
| 36 |                                                                                                                         |      |
| 37 | >sp O62644 LECT2_BOVIN Leukocyte cell-derived chemotaxin-2 OS=Bos taurus GN=LECT2 PE=1 SV=1                             | 0.03 |
| 38 | >Reverse >tr E1BCF0 E1BCF0_BOVIN Uncharacterized protein OS=Bos taurus GN=PIBF1 PE=4 SV=2                               | 0.03 |
| 39 | >sp P98140 FA12_BOVIN Coagulation factor XII OS=Bos taurus GN=F12 PE=1 SV=2                                             | 0.03 |
| 40 | >tr F1MN49 F1MN49_BOVIN Uncharacterized protein OS=Bos taurus GN=EIF5A2 PE=4 SV=2                                       | 0.03 |
| 41 |                                                                                                                         |      |
| 42 | >sp Q29S21 K2C7_BOVIN Keratin, type II cytoskeletal 7 OS=Bos taurus GN=KRT7 PE=2 SV=1                                   | 0.02 |
| 43 |                                                                                                                         |      |
| 44 | >tr K4JBR9 K4JBR9_BOVIN Alpha-2-macroglobulin variant 6 OS=Bos taurus GN=A2M PE=2 SV=1                                  | 0.02 |
| 45 |                                                                                                                         |      |
| 46 | >tr F1N5M2 F1N5M2_BOVIN Vitamin D-binding protein OS=Bos taurus GN=GC PE=4 SV=2                                         | 0.02 |
| 47 |                                                                                                                         |      |
| 48 | >sp Q3T0F4 RS10_BOVIN 40S ribosomal protein S10 OS=Bos taurus GN=RPS10 PE=2 SV=1                                        | 0.02 |
| 49 |                                                                                                                         |      |
| 50 |                                                                                                                         |      |
| 51 |                                                                                                                         |      |
| 52 |                                                                                                                         |      |
| 53 |                                                                                                                         |      |
| 54 |                                                                                                                         |      |
| 55 |                                                                                                                         |      |
| 56 |                                                                                                                         |      |
| 57 |                                                                                                                         |      |
| 58 |                                                                                                                         |      |
| 59 |                                                                                                                         |      |
| 60 |                                                                                                                         |      |

|    |                                  |                                                                |      |
|----|----------------------------------|----------------------------------------------------------------|------|
| 1  |                                  |                                                                |      |
| 2  |                                  |                                                                |      |
| 3  |                                  |                                                                |      |
| 4  |                                  | SV=1                                                           |      |
| 5  | >sp Q32LP0 URP2_BOVIN            | Fermitin family homolog 3 OS=Bos taurus GN=FERMT3 PE=2         | 0.02 |
| 6  |                                  | SV=1                                                           |      |
| 7  | >tr F1MZ78 F1MZ78_BOVIN          | Uncharacterized protein (Fragment) OS=Bos taurus               | 0.02 |
| 8  |                                  | GN=LRRCC1 PE=4 SV=2                                            |      |
| 9  | >sp P46193 ANXA1_BOVIN           | Annexin A1 OS=Bos taurus GN=ANXA1 PE=2 SV=2                    | 0.02 |
| 10 | >tr Q2KIF2 Q2KIF2_BOVIN          | Leucine-rich alpha-2-glycoprotein 1 OS=Bos taurus              | 0.02 |
| 11 |                                  | GN=LRG1 PE=2 SV=1                                              |      |
| 12 | >sp P69678 CUTA_BOVIN            | Protein CutA OS=Bos taurus GN=CUTA PE=1 SV=1                   | 0.02 |
| 13 | >tr A7E350 A7E350_BOVIN          | PLG protein OS=Bos taurus GN=PLG PE=2 SV=1                     | 0.02 |
| 14 | >sp P04261 K2C3_BOVIN            | Keratin, type II cytoskeletal 60 kDa, component III (Fragment) | 0.02 |
| 15 |                                  | OS=Bos taurus PE=2 SV=1                                        |      |
| 16 | >Reverse >sp A5D7S3 TRM1L_BOVIN  | TRMT1-like protein OS=Bos taurus GN=TRMT1L                     | 0.02 |
| 17 |                                  | PE=2 SV=1                                                      |      |
| 18 | >tr F1N789 F1N789_BOVIN          | Uncharacterized protein OS=Bos taurus GN=VCL PE=4 SV=1         | 0.02 |
| 19 | >tr A6QQA8 A6QQA8_BOVIN          | Sulfhydryl oxidase OS=Bos taurus GN=QSOX1 PE=2 SV=1            | 0.02 |
| 20 | >tr Q08DL0 Q08DL0_BOVIN          | SLC3A2 protein OS=Bos taurus GN=SLC3A2 PE=2 SV=1               | 0.02 |
| 21 | >tr G5E5T5 G5E5T5_BOVIN          | Uncharacterized protein (Fragment) OS=Bos taurus PE=4          | 0.02 |
| 22 |                                  | SV=1                                                           |      |
| 23 | >tr K4JBA2 K4JBA2_BOVIN          | Alpha-2-macroglobulin variant 9 OS=Bos taurus GN=A2M           | 0.02 |
| 24 |                                  | PE=2 SV=1                                                      |      |
| 25 | >sp ALBU_HUMAN (Common           | contaminant protein)                                           | 0.02 |
| 26 | >sp Q27967 SPP24_BOVIN           | Secreted phosphoprotein 24 OS=Bos taurus GN=SPP2 PE=1          | 0.02 |
| 27 |                                  | SV=2                                                           |      |
| 28 | >tr E1BCH9 E1BCH9_BOVIN          | Uncharacterized protein OS=Bos taurus GN=VCPIP1 PE=4           | 0.02 |
| 29 |                                  | SV=2                                                           |      |
| 30 | >sp A6QR46 RAB6B_BOVIN           | Ras-related protein Rab-6B OS=Bos taurus GN=RAB6B              | 0.02 |
| 31 |                                  | PE=2 SV=1                                                      |      |
| 32 | >tr K4JDT2 K4JDT2_BOVIN          | Alpha-2-macroglobulin variant 20 OS=Bos taurus GN=A2M          | 0.02 |
| 33 |                                  | PE=2 SV=1                                                      |      |
| 34 | >sp P81948 TBA4A_BOVIN           | Tubulin alpha-4A chain OS=Bos taurus GN=TUBA4A PE=1            | 0.02 |
| 35 |                                  | SV=2                                                           |      |
| 36 | >tr A6QNW7 A6QNW7_BOVIN          | CD5L protein OS=Bos taurus GN=CD5L PE=2 SV=1                   | 0.02 |
| 37 | >tr F1MMD7 F1MMD7_BOVIN          | Inter-alpha-trypsin inhibitor heavy chain H4 OS=Bos            | 0.02 |
| 38 |                                  | taurus GN=ITIH4 PE=4 SV=2                                      |      |
| 39 | >tr Q28194 Q28194_BOVIN          | Thrombospondin-1 (Fragment) OS=Bos taurus PE=2 SV=1            | 0.02 |
| 40 | >tr B2Z4B1 B2Z4B1_BOVIN          | Angiopoietin-like protein 3 OS=Bos taurus GN=ANGPTL3           | 0.02 |
| 41 |                                  | PE=2 SV=1                                                      |      |
| 42 | >tr Q2YDK6 Q2YDK6_BOVIN          | Dickkopf-like 1 (Soggy) OS=Bos taurus GN=DKKL1 PE=2            | 0.02 |
| 43 |                                  | SV=1                                                           |      |
| 44 | >Reverse >sp P20811 ICAL_BOVIN   | Calpastatin OS=Bos taurus GN=CAST PE=1 SV=2                    | 0.02 |
| 45 | >sp Q3SYV4 CAP1_BOVIN            | Adenylyl cyclase-associated protein 1 OS=Bos taurus            | 0.02 |
| 46 |                                  | GN=CAP1 PE=2 SV=3                                              |      |
| 47 | >tr E1B7Q0 E1B7Q0_BOVIN          | Protein Hook homolog 3 OS=Bos taurus GN=HOOK3 PE=4             | 0.02 |
| 48 |                                  | SV=1                                                           |      |
| 49 | >sp Q5E9B7 CLIC1_BOVIN           | Chloride intracellular channel protein 1 OS=Bos taurus         | 0.02 |
| 50 |                                  | GN=CLIC1 PE=2 SV=3                                             |      |
| 51 | >sp P63103 1433Z_BOVIN           | 14-3-3 protein zeta/delta OS=Bos taurus GN=YWHAZ PE=1          | 0.02 |
| 52 |                                  | SV=1                                                           |      |
| 53 | >tr E1B7G5 E1B7G5_BOVIN          | Uncharacterized protein OS=Bos taurus GN=RBM12B PE=4           | 0.02 |
| 54 |                                  | SV=2                                                           |      |
| 55 | >sp Q58CQ9 VNN1_BOVIN            | Pantetheinase OS=Bos taurus GN=VNN1 PE=2 SV=1                  | 0.02 |
| 56 | >sp Q148H5 K2C71_BOVIN           | Keratin, type II cytoskeletal 71 OS=Bos taurus GN=KRT71        | 0.01 |
| 57 |                                  | PE=2 SV=1                                                      |      |
| 58 | >Reverse >tr F1MTZ8 F1MTZ8_BOVIN | Uncharacterized protein OS=Bos taurus                          | 0.01 |
| 59 |                                  |                                                                |      |
| 60 |                                  |                                                                |      |

|    |  |                                                                                                 |             |
|----|--|-------------------------------------------------------------------------------------------------|-------------|
| 1  |  |                                                                                                 |             |
| 2  |  |                                                                                                 |             |
| 3  |  |                                                                                                 |             |
| 4  |  | <b>GN=ASPSCR1 PE=4 SV=2</b>                                                                     |             |
| 5  |  | <b>&gt;tr F1MC45 F1MC45_BOVIN Complement factor H (Fragment) OS=Bos taurus GN=CFH</b>           | <b>0.01</b> |
| 6  |  | <b>PE=4 SV=2</b>                                                                                |             |
| 7  |  | <b>&gt;Reverse &gt;tr E1BHU6 E1BHU6_BOVIN Uncharacterized protein OS=Bos taurus</b>             | <b>0.01</b> |
| 8  |  | <b>GN=AFF1 PE=4 SV=2</b>                                                                        |             |
| 9  |  | <b>&gt;tr Q17QH1 Q17QH1_BOVIN APOF protein OS=Bos taurus GN=APOF PE=2 SV=2</b>                  | <b>0.01</b> |
| 10 |  | <b>&gt;Reverse &gt;sp Q1JPJ2 XPP1_BOVIN Xaa-Pro aminopeptidase 1 OS=Bos taurus</b>              | <b>0.01</b> |
| 11 |  | <b>GN=XPNPEP1 PE=2 SV=1</b>                                                                     |             |
| 12 |  | <b>&gt;sp P42916 CL43_BOVIN Collectin-43 OS=Bos taurus GN=CL43 PE=1 SV=2</b>                    | <b>0.01</b> |
| 13 |  | <b>&gt;tr F1MWU9 F1MWU9_BOVIN Uncharacterized protein OS=Bos taurus GN=HSPA6 PE=3</b>           | <b>0.01</b> |
| 14 |  | <b>SV=2</b>                                                                                     |             |
| 15 |  | <b>&gt;tr F1MC75 F1MC75_BOVIN Uncharacterized protein (Fragment) OS=Bos taurus</b>              | <b>0.01</b> |
| 16 |  | <b>GN=PARVB PE=4 SV=1</b>                                                                       |             |
| 17 |  | <b>&gt;tr E1BAU6 E1BAU6_BOVIN Uncharacterized protein OS=Bos taurus GN=INPP5E PE=4</b>          | <b>0.01</b> |
| 18 |  | <b>SV=1</b>                                                                                     |             |
| 19 |  | <b>&gt;tr E1BNS9 E1BNS9_BOVIN L-lactate dehydrogenase OS=Bos taurus GN=LDHC PE=3</b>            | <b>0.01</b> |
| 20 |  | <b>SV=2</b>                                                                                     |             |
| 21 |  | <b>&gt;sp P07224 PROS_BOVIN Vitamin K-dependent protein S OS=Bos taurus GN=PROS1</b>            | <b>0.01</b> |
| 22 |  | <b>PE=1 SV=1</b>                                                                                |             |
| 23 |  | <b>&gt;tr E1BI98 E1BI98_BOVIN Uncharacterized protein OS=Bos taurus GN=COL6A1 PE=4</b>          | <b>0.01</b> |
| 24 |  | <b>SV=1</b>                                                                                     |             |
| 25 |  | <b>&gt;sp Q76915 MET_BOVIN Hepatocyte growth factor receptor OS=Bos taurus GN=MET</b>           | <b>0.01</b> |
| 26 |  | <b>PE=2 SV=1</b>                                                                                |             |
| 27 |  | <b>&gt;sp Q28201 TKDP1_BOVIN Trophoblast Kunitz domain protein 1 OS=Bos taurus</b>              | <b>0.01</b> |
| 28 |  | <b>GN=TKDP1 PE=2 SV=2</b>                                                                       |             |
| 29 |  | <b>&gt;tr F1MMK9 F1MMK9_BOVIN Protein AMBP OS=Bos taurus GN=AMBP PE=4 SV=2</b>                  | <b>0.01</b> |
| 30 |  | <b>&gt;sp Q27970 CAN1_BOVIN Calpain-1 catalytic subunit OS=Bos taurus GN=CAPN1 PE=1</b>         | <b>0.01</b> |
| 31 |  | <b>SV=3</b>                                                                                     |             |
| 32 |  | <b>&gt;sp Q8SPJ1 PLAK_BOVIN Junction plakoglobin OS=Bos taurus GN=JUP PE=2 SV=1</b>             | <b>0.01</b> |
| 33 |  | <b>&gt;sp P33433 HRG_BOVIN Histidine-rich glycoprotein (Fragments) OS=Bos taurus</b>            | <b>0.01</b> |
| 34 |  | <b>GN=HRG PE=1 SV=1</b>                                                                         |             |
| 35 |  | <b>&gt;sp P00744 PROZ_BOVIN Vitamin K-dependent protein Z OS=Bos taurus GN=PROZ</b>             | <b>0.01</b> |
| 36 |  | <b>PE=1 SV=1</b>                                                                                |             |
| 37 |  | <b>&gt;sp P08037 B4GT1_BOVIN Beta-1,4-galactosyltransferase 1 OS=Bos taurus</b>                 | <b>0.01</b> |
| 38 |  | <b>GN=B4GALT1 PE=1 SV=3</b>                                                                     |             |
| 39 |  | <b>&gt;tr F1N0H9 F1N0H9_BOVIN Elastin OS=Bos taurus GN=ELN PE=4 SV=2</b>                        | <b>0.01</b> |
| 40 |  | <b>&gt;tr K4JDR8 K4JDR8_BOVIN Alpha-2-macroglobulin variant 5 OS=Bos taurus GN=A2M</b>          | <b>0.01</b> |
| 41 |  | <b>PE=2 SV=1</b>                                                                                |             |
| 42 |  | <b>&gt;sp P00741 FA9_BOVIN Coagulation factor IX (Fragment) OS=Bos taurus GN=F9 PE=1</b>        | <b>0.01</b> |
| 43 |  | <b>SV=1</b>                                                                                     |             |
| 44 |  | <b>&gt;sp Q3MHL4 SAHH_BOVIN Adenosylhomocysteinase OS=Bos taurus GN=AHCY PE=2</b>               | <b>0.01</b> |
| 45 |  | <b>SV=3</b>                                                                                     |             |
| 46 |  | <b>&gt;Reverse &gt;tr E1BAT8 E1BAT8_BOVIN Uncharacterized protein OS=Bos taurus</b>             | <b>0.01</b> |
| 47 |  | <b>GN=KIF20B PE=3 SV=1</b>                                                                      |             |
| 48 |  | <b>&gt;sp P49410 EFTU_BOVIN Elongation factor Tu, mitochondrial OS=Bos taurus GN=TUFM</b>       | <b>0.01</b> |
| 49 |  | <b>PE=1 SV=1</b>                                                                                |             |
| 50 |  | <b>&gt;Reverse &gt;sp Q0IIE2 SHC1_BOVIN SHC-transforming protein 1 OS=Bos taurus</b>            | <b>0.01</b> |
| 51 |  | <b>GN=SHC1 PE=2 SV=1</b>                                                                        |             |
| 52 |  | <b>&gt;tr A6QQP5 A6QQP5_BOVIN SPN protein OS=Bos taurus GN=SPN PE=2 SV=1</b>                    | <b>0.01</b> |
| 53 |  | <b>&gt;Reverse &gt;tr A5D7Q2 A5D7Q2_BOVIN Putative uncharacterized protein OS=Bos taurus</b>    | <b>0.01</b> |
| 54 |  | <b>PE=2 SV=1</b>                                                                                |             |
| 55 |  | <b>&gt;tr E1BGU2 E1BGU2_BOVIN Uncharacterized protein (Fragment) OS=Bos taurus</b>              | <b>0.01</b> |
| 56 |  | <b>GN=CLASP1 PE=4 SV=2</b>                                                                      |             |
| 57 |  | <b>&gt;sp P58352 GTR3_BOVIN Solute carrier family 2, facilitated glucose transporter member</b> | <b>0.01</b> |
| 58 |  | <b>3 OS=Bos taurus GN=SLC2A3 PE=2 SV=1</b>                                                      |             |
| 59 |  |                                                                                                 |             |
| 60 |  |                                                                                                 |             |

|                                                                                                |      |
|------------------------------------------------------------------------------------------------|------|
| >tr Q3MHH8 Q3MHH8_BOVIN Amylase, alpha 2A (Pancreatic) OS=Bos taurus<br>GN=AMY2A PE=2 SV=1     | 0.01 |
| >sp Q5EAD2 SERA_BOVIN D-3-phosphoglycerate dehydrogenase OS=Bos taurus<br>GN=PHGDH PE=2 SV=3   | 0.01 |
| >tr Q59A30 Q59A30_BOVIN SON DNA-binding protein OS=Bos taurus GN=son PE=4<br>SV=1              | 0.01 |
| >sp Q95JC7 AAAT_BOVIN Neutral amino acid transporter B(0) OS=Bos taurus<br>GN=SLC1A5 PE=2 SV=1 | 0.01 |
| >tr K4JR81 K4JR81_BOVIN Alpha-2-macroglobulin variant 12 OS=Bos taurus GN=A2M<br>PE=2 SV=1     | 0.01 |
| >tr E1BB32 E1BB32_BOVIN Uncharacterized protein OS=Bos taurus GN=GP1BA PE=4<br>SV=2            | 0.01 |
| >tr F1N169 F1N169_BOVIN Uncharacterized protein OS=Bos taurus GN=FLNA PE=4<br>SV=2             | 0.01 |
| >sp P02453 CO1A1_BOVIN Collagen alpha-1(I) chain OS=Bos taurus GN=COL1A1 PE=1<br>SV=3          | 0.01 |
| >sp Q76LV2 HS90A_BOVIN Heat shock protein HSP 90-alpha OS=Bos taurus<br>GN=HSP90AA1 PE=1 SV=3  | 0.01 |

### Sample 3

| Description                                                                             | NpSp<br>C |
|-----------------------------------------------------------------------------------------|-----------|
| >sp P01966 HBA_BOVIN Hemoglobin subunit alpha OS=Bos taurus GN=HBA PE=1 SV=2            | 18.45     |
| >tr B0JYN6 B0JYN6_BOVIN Alpha-2-HS-glycoprotein OS=Bos taurus GN=AHSG PE=2<br>SV=1      | 9.01      |
| >sp P81644 APOA2_BOVIN Apolipoprotein A-II OS=Bos taurus GN=APOA2 PE=1 SV=2             | 7.96      |
| >sp P02081 HBBF_BOVIN Hemoglobin fetal subunit beta OS=Bos taurus PE=1 SV=1             | 7.32      |
| >sp ALBU_BOVIN (Common contaminant protein)                                             | 6.89      |
| >sp P15497 APOA1_BOVIN Apolipoprotein A-I OS=Bos taurus GN=APOA1 PE=1 SV=3              | 5.74      |
| >sp P34955 A1AT_BOVIN Alpha-1-antiproteinase OS=Bos taurus GN=SERPINA1 PE=1<br>SV=1     | 5.49      |
| >tr Q9TRP4 Q9TRP4_BOVIN Fetuin (Fragment) OS=Bos taurus PE=1 SV=1                       | 1.81      |
| >sp Q03247 APOE_BOVIN Apolipoprotein E OS=Bos taurus GN=APOE PE=2 SV=1                  | 1.22      |
| >sp K1C10_HUMAN (Common contaminant protein)                                            | 1.20      |
| >sp HBA_HUMAN (Common contaminant protein)                                              | 1.04      |
| >tr B0JYQ0 B0JYQ0_BOVIN ALB protein OS=Bos taurus GN=ALB PE=2 SV=1                      | 0.98      |
| >sp P19035 APOC3_BOVIN Apolipoprotein C-III OS=Bos taurus GN=APOC3 PE=1 SV=2            | 0.94      |
| >sp P19034 APOC2_BOVIN Apolipoprotein C-II OS=Bos taurus GN=APOC2 PE=1 SV=2             | 0.90      |
| >sp K2C1_HUMAN (Common contaminant protein)                                             | 0.88      |
| >sp Q29443 TRFE_BOVIN Serotransferrin OS=Bos taurus GN=TF PE=2 SV=1                     | 0.85      |
| >tr F1MSZ6 F1MSZ6_BOVIN Antithrombin-III OS=Bos taurus GN=SERPINC1 PE=3 SV=1            | 0.79      |
| >sp Q46375 TTHY_BOVIN Transthyretin OS=Bos taurus GN=TTR PE=1 SV=1                      | 0.76      |
| >sp P00735 THRB_BOVIN Prothrombin OS=Bos taurus GN=F2 PE=1 SV=2                         | 0.71      |
| >sp Q3SZ57 FETA_BOVIN Alpha-fetoprotein OS=Bos taurus GN=AFP PE=2 SV=1                  | 0.69      |
| >sp Q3SZR3 A1AG_BOVIN Alpha-1-acid glycoprotein OS=Bos taurus GN=ORM1 PE=2<br>SV=1      | 0.66      |
| >sp K22E_HUMAN (Common contaminant protein)                                             | 0.66      |
| >sp Q58D62 FETUB_BOVIN Fetuin-B OS=Bos taurus GN=FETUB PE=2 SV=1                        | 0.65      |
| >sp Q32PJ2 APOA4_BOVIN Apolipoprotein A-IV OS=Bos taurus GN=APOA4 PE=2 SV=1             | 0.65      |
| >tr G3N0S9 G3N0S9_BOVIN Uncharacterized protein OS=Bos taurus GN=LOC515150<br>PE=4 SV=1 | 0.60      |
| >tr F1MD83 F1MD83_BOVIN Platelet factor 4 OS=Bos taurus GN=PF4 PE=3 SV=1                | 0.58      |
| >sp K1C9_HUMAN (Common contaminant protein)                                             | 0.55      |
| >tr Q3SZH5 Q3SZH5_BOVIN Angiotensinogen OS=Bos taurus GN=AGT PE=2 SV=1                  | 0.50      |

|                                                                                                       |      |
|-------------------------------------------------------------------------------------------------------|------|
| >sp P0C0S9 H2A1_BOVIN Histone H2A type 1 OS=Bos taurus PE=1 SV=2                                      | 0.48 |
| >tr A6QPP2 A6QPP2_BOVIN SERPIND1 protein OS=Bos taurus GN=SERPIND1 PE=2 SV=1                          | 0.48 |
| >sp P12763 FETUA_BOVIN Alpha-2-HS-glycoprotein OS=Bos taurus GN=AHSG PE=1 SV=2                        | 0.47 |
| >sp P17697 CLUS_BOVIN Clusterin OS=Bos taurus GN=CLU PE=1 SV=1                                        | 0.46 |
| >tr Q1RMN9 Q1RMN9_BOVIN C4b-binding protein alpha-like OS=Bos taurus GN=LOC510860 PE=2 SV=1           | 0.45 |
| >tr F1N5M2 F1N5M2_BOVIN Vitamin D-binding protein OS=Bos taurus GN=GC PE=4 SV=2                       | 0.43 |
| >sp P17690 APOH_BOVIN Beta-2-glycoprotein 1 OS=Bos taurus GN=APOH PE=1 SV=4                           | 0.43 |
| >sp P60712 ACTB_BOVIN Actin, cytoplasmic 1 OS=Bos taurus GN=ACTB PE=1 SV=1                            | 0.39 |
| >sp P61223 RAP1B_BOVIN Ras-related protein Rap-1b OS=Bos taurus GN=RAP1B PE=2 SV=1                    | 0.39 |
| >sp Q2KIS7 TETN_BOVIN Tetranectin OS=Bos taurus GN=CLEC3B PE=2 SV=1                                   | 0.39 |
| >sp Q7SIH1 A2MG_BOVIN Alpha-2-macroglobulin OS=Bos taurus GN=A2M PE=1 SV=2                            | 0.38 |
| >sp Q5E9N9 APEX2_BOVIN DNA-(apurinic or apyrimidinic site) lyase 2 OS=Bos taurus GN=APEX2 PE=2 SV=1   | 0.38 |
| >tr Q3ZBS7 Q3ZBS7_BOVIN Uncharacterized protein OS=Bos taurus GN=VTN PE=2 SV=1                        | 0.37 |
| >tr E1BI48 E1BI48_BOVIN Uncharacterized protein OS=Bos taurus GN=KRTDAP PE=4 SV=1                     | 0.35 |
| >tr F1MNV5 F1MNV5_BOVIN Kininogen-1 OS=Bos taurus GN=KNG1 PE=4 SV=2                                   | 0.34 |
| >Reverse >tr E1BH55 E1BH55_BOVIN Uncharacterized protein OS=Bos taurus GN=LOC504623 PE=3 SV=2         | 0.34 |
| >sp Q2UVX4 CO3_BOVIN Complement C3 OS=Bos taurus GN=C3 PE=1 SV=2                                      | 0.34 |
| >sp P02769 ALBU_BOVIN Serum albumin OS=Bos taurus GN=ALB PE=1 SV=4                                    | 0.33 |
| >sp P10096 G3P_BOVIN Glyceraldehyde-3-phosphate dehydrogenase OS=Bos taurus GN=GAPDH PE=1 SV=4        | 0.33 |
| >tr E1BIG6 E1BIG6_BOVIN Uncharacterized protein OS=Bos taurus GN=TFRC PE=4 SV=2                       | 0.33 |
| >sp TRYP_PIG (Common contaminant protein)                                                             | 0.32 |
| >tr Q3ZBQ9 Q3ZBQ9_BOVIN APOM protein OS=Bos taurus GN=APOM PE=4 SV=1                                  | 0.30 |
| >sp Q3T052 ITIH4_BOVIN Inter-alpha-trypsin inhibitor heavy chain H4 OS=Bos taurus GN=ITIH4 PE=1 SV=1  | 0.29 |
| >tr Q5J801 Q5J801_BOVIN Endopin 2B OS=Bos taurus PE=2 SV=1                                            | 0.28 |
| >sp Q3SYR5 APOC4_BOVIN Apolipoprotein C-IV OS=Bos taurus GN=APOC4 PE=2 SV=1                           | 0.27 |
| >sp P00978 AMBP_BOVIN Protein AMBP OS=Bos taurus GN=AMBP PE=1 SV=2                                    | 0.27 |
| >tr F1N116 F1N116_BOVIN Gelsolin OS=Bos taurus GN=GSN PE=4 SV=1                                       | 0.26 |
| >tr G1K122 G1K122_BOVIN Retinol-binding protein 4 OS=Bos taurus GN=RBP4 PE=3 SV=1                     | 0.25 |
| >tr A5D7S8 A5D7S8_BOVIN Fibulin-1 OS=Bos taurus GN=FBLN1 PE=2 SV=1                                    | 0.25 |
| >sp Q9TTE1 SPA31_BOVIN Serpin A3-1 OS=Bos taurus GN=SERPINA3-1 PE=1 SV=3                              | 0.24 |
| >tr J9QD97 J9QD97_BOVIN Periostin variant 9 OS=Bos taurus PE=2 SV=1                                   | 0.24 |
| >tr F1MNW4 F1MNW4_BOVIN Inter-alpha-trypsin inhibitor heavy chain H2 OS=Bos taurus GN=ITIH2 PE=4 SV=2 | 0.23 |
| >sp P28800 A2AP_BOVIN Alpha-2-antiplasmin OS=Bos taurus GN=SERPINF2 PE=1 SV=2                         | 0.22 |
| >tr E1BIK4 E1BIK4_BOVIN Uncharacterized protein OS=Bos taurus GN=PPBP PE=3 SV=1                       | 0.21 |
| >sp Q3T0P6 PGK1_BOVIN Phosphoglycerate kinase 1 OS=Bos taurus GN=PGK1 PE=2 SV=3                       | 0.21 |
| >sp Q9N2I2 IPSP_BOVIN Plasma serine protease inhibitor OS=Bos taurus GN=SERPINA5 PE=1 SV=1            | 0.21 |
| >sp P02672 FIBA_BOVIN Fibrinogen alpha chain OS=Bos taurus GN=FGA PE=1 SV=5                           | 0.20 |

|    |                                  |                                                                               |      |
|----|----------------------------------|-------------------------------------------------------------------------------|------|
| 1  |                                  |                                                                               |      |
| 2  |                                  |                                                                               |      |
| 3  | >tr G5E513 G5E513_BOVIN          | Uncharacterized protein (Fragment) OS=Bos taurus PE=4 SV=1                    | 0.19 |
| 4  |                                  |                                                                               |      |
| 5  | >tr G3MZ21 G3MZ21_BOVIN          | Uncharacterized protein OS=Bos taurus PE=3 SV=1                               | 0.19 |
| 6  | >sp Q3SZV7 HEMO_BOVIN            | Hemopexin OS=Bos taurus GN=HPX PE=2 SV=1                                      | 0.17 |
| 7  | >tr E1BNR0 E1BNR0_BOVIN          | Uncharacterized protein OS=Bos taurus GN=APOB PE=4 SV=2                       | 0.17 |
| 8  |                                  |                                                                               |      |
| 9  | >sp Q2KJF1 A1BG_BOVIN            | Alpha-1B-glycoprotein OS=Bos taurus GN=A1BG PE=1 SV=1                         | 0.17 |
| 10 | >tr Q3SZZ9 Q3SZZ9_BOVIN          | FGG protein OS=Bos taurus GN=FGG PE=2 SV=1                                    | 0.15 |
| 11 | >sp P56652 ITIH3_BOVIN           | Inter-alpha-trypsin inhibitor heavy chain H3 OS=Bos taurus GN=ITIH3 PE=1 SV=2 | 0.15 |
| 12 |                                  |                                                                               |      |
| 13 | >tr F1MC11 F1MC11_BOVIN          | Keratin, type I cytoskeletal 14 OS=Bos taurus GN=KRT14 PE=3 SV=2              | 0.15 |
| 14 |                                  |                                                                               |      |
| 15 | >sp P19858 LDHA_BOVIN            | L-lactate dehydrogenase A chain OS=Bos taurus GN=LDHA PE=2 SV=2               | 0.15 |
| 16 |                                  |                                                                               |      |
| 17 | >tr E1B726 E1B726_BOVIN          | Plasminogen OS=Bos taurus GN=PLG PE=3 SV=2                                    | 0.14 |
| 18 | >sp P37141 GPX3_BOVIN            | Glutathione peroxidase 3 OS=Bos taurus GN=GPX3 PE=2 SV=2                      | 0.14 |
| 19 |                                  |                                                                               |      |
| 20 | >tr Q3ZC85 Q3ZC85_BOVIN          | Plasmalemma vesicle associated protein OS=Bos taurus GN=PLVAP PE=2 SV=1       | 0.13 |
| 21 |                                  |                                                                               |      |
| 22 | >tr E1BJF9 E1BJF9_BOVIN          | Serum amyloid A protein OS=Bos taurus GN=SAA3 PE=3 SV=1                       | 0.12 |
| 23 |                                  |                                                                               |      |
| 24 | >sp Q2KJH6 SERPH_BOVIN           | Serpin H1 OS=Bos taurus GN=SERPINH1 PE=2 SV=1                                 | 0.12 |
| 25 | >tr E1BGJ4 E1BGJ4_BOVIN          | Uncharacterized protein OS=Bos taurus GN=MAN2A2 PE=4 SV=1                     | 0.12 |
| 26 |                                  |                                                                               |      |
| 27 | >sp Q05443 LUM_BOVIN             | Lumican OS=Bos taurus GN=LUM PE=1 SV=1                                        | 0.12 |
| 28 | >sp P68103 EF1A1_BOVIN           | Elongation factor 1-alpha 1 OS=Bos taurus GN=EEF1A1 PE=2 SV=1                 | 0.11 |
| 29 |                                  |                                                                               |      |
| 30 | >tr E1BH06 E1BH06_BOVIN          | Uncharacterized protein OS=Bos taurus GN=C4A PE=4 SV=2                        | 0.11 |
| 31 |                                  |                                                                               |      |
| 32 | >tr Q58DL9 Q58DL9_BOVIN          | Phospholipid transfer protein OS=Bos taurus GN=PLTP PE=2 SV=1                 | 0.11 |
| 33 |                                  |                                                                               |      |
| 34 | >Reverse >tr E1BIG0 E1BIG0_BOVIN | Uncharacterized protein OS=Bos taurus GN=METTL6 PE=4 SV=1                     | 0.11 |
| 35 |                                  |                                                                               |      |
| 36 | >sp P02070 HBB_BOVIN             | Hemoglobin subunit beta OS=Bos taurus GN=HBB PE=1 SV=1                        | 0.11 |
| 37 | >tr G3N1Y3 G3N1Y3_BOVIN          | Uncharacterized protein (Fragment) OS=Bos taurus PE=3 SV=1                    | 0.11 |
| 38 |                                  |                                                                               |      |
| 39 | >tr Q3ZC87 Q3ZC87_BOVIN          | Pyruvate kinase (Fragment) OS=Bos taurus GN=PKM2 PE=2 SV=1                    | 0.10 |
| 40 |                                  |                                                                               |      |
| 41 | >sp P60661 MYL6_BOVIN            | Myosin light polypeptide 6 OS=Bos taurus GN=MYL6 PE=2 SV=2                    | 0.10 |
| 42 |                                  |                                                                               |      |
| 43 | >sp Q28178 TSP1_BOVIN            | Thrombospondin-1 OS=Bos taurus GN=THBS1 PE=2 SV=2                             | 0.10 |
| 44 | >sp P02676 FIBB_BOVIN            | Fibrinogen beta chain OS=Bos taurus GN=FGB PE=1 SV=2                          | 0.10 |
| 45 | >tr A4FV94 A4FV94_BOVIN          | KRT6A protein OS=Bos taurus GN=KRT6A PE=2 SV=1                                | 0.09 |
| 46 | >sp Q27975 HS71A_BOVIN           | Heat shock 70 kDa protein 1A OS=Bos taurus GN=HSPA1A PE=1 SV=2                | 0.09 |
| 47 |                                  |                                                                               |      |
| 48 | >sp A4IF97 ML12B_BOVIN           | Myosin regulatory light chain 12B OS=Bos taurus GN=MYL12B PE=2 SV=1           | 0.09 |
| 49 |                                  |                                                                               |      |
| 50 | >tr G5E604 G5E604_BOVIN          | Uncharacterized protein (Fragment) OS=Bos taurus PE=4 SV=1                    | 0.09 |
| 51 |                                  |                                                                               |      |
| 52 | >tr E1BMJ0 E1BMJ0_BOVIN          | Uncharacterized protein OS=Bos taurus GN=SERPING1 PE=3 SV=2                   | 0.09 |
| 53 |                                  |                                                                               |      |
| 54 | >tr A4IFP7 A4IFP7_BOVIN          | ARF5 protein OS=Bos taurus GN=ARF5 PE=2 SV=1                                  | 0.09 |
| 55 | >tr E1BJK2 E1BJK2_BOVIN          | Uncharacterized protein OS=Bos taurus GN=TUBB1 PE=3 SV=1                      | 0.08 |
| 56 |                                  |                                                                               |      |
| 57 | >tr F2Z4C1 F2Z4C1_BOVIN          | Uncharacterized protein OS=Bos taurus GN=TUBA1A PE=1 SV=1                     | 0.08 |
| 58 |                                  |                                                                               |      |
| 59 |                                  |                                                                               |      |
| 60 |                                  |                                                                               |      |

|    |                                                                                       |                                        |      |
|----|---------------------------------------------------------------------------------------|----------------------------------------|------|
| 1  |                                                                                       |                                        |      |
| 2  |                                                                                       |                                        |      |
| 3  |                                                                                       |                                        |      |
| 4  |                                                                                       | SV=1                                   |      |
| 5  | >sp Q3T0I5 FIS1_BOVIN Mitochondrial fission 1 protein OS=Bos taurus GN=FIS1 PE=2      |                                        | 0.08 |
| 6  |                                                                                       | SV=1                                   |      |
| 7  | >tr Q2YDK6 Q2YDK6_BOVIN Dickkopf-like 1 (Soggy) OS=Bos taurus GN=DKKL1 PE=2           |                                        | 0.08 |
| 8  |                                                                                       | SV=1                                   |      |
| 9  | >sp Q3MHN5 VTDB_BOVIN Vitamin D-binding protein OS=Bos taurus GN=GC PE=2              |                                        | 0.08 |
| 10 |                                                                                       | SV=1                                   |      |
| 11 | >sp Q3T149 HSPB1_BOVIN Heat shock protein beta-1 OS=Bos taurus GN=HSPB1 PE=2          |                                        | 0.08 |
| 12 |                                                                                       | SV=1                                   |      |
| 13 | >sp P62935 PPIA_BOVIN Peptidyl-prolyl cis-trans isomerase A OS=Bos taurus GN=PPIA     |                                        | 0.08 |
| 14 |                                                                                       | PE=1 SV=2                              |      |
| 15 | >sp Q2M2T1 H2B1K_BOVIN Histone H2B type 1-K OS=Bos taurus GN=HIST1H2BK PE=1           |                                        | 0.07 |
| 16 |                                                                                       | SV=3                                   |      |
| 17 | >sp P81187 CFAB_BOVIN Complement factor B OS=Bos taurus GN=CFB PE=1 SV=2              |                                        | 0.07 |
| 18 | >tr Q58DK0 Q58DK0_BOVIN Integrin alpha 2b OS=Bos taurus GN=ITGA2B PE=2 SV=1           |                                        | 0.07 |
| 19 | >tr G5E5T5 G5E5T5_BOVIN Uncharacterized protein (Fragment) OS=Bos taurus PE=4         |                                        | 0.07 |
| 20 |                                                                                       | SV=1                                   |      |
| 21 | >tr G5E5T3 G5E5T3_BOVIN Uncharacterized protein (Fragment) OS=Bos taurus              |                                        | 0.07 |
| 22 |                                                                                       | GN=LOC100299180 PE=3 SV=1              |      |
| 23 | >sp A6QQ91 RASL3_BOVIN RAS protein activator like-3 OS=Bos taurus GN=RASAL3           |                                        | 0.07 |
| 24 |                                                                                       | PE=2 SV=1                              |      |
| 25 | >tr F1N4M7 F1N4M7_BOVIN Uncharacterized protein OS=Bos taurus GN=CFI PE=3 SV=2        |                                        | 0.07 |
| 26 | >sp P27674 GTR1_BOVIN Solute carrier family 2, facilitated glucose transporter member |                                        | 0.07 |
| 27 |                                                                                       | 1 OS=Bos taurus GN=SLC2A1 PE=2 SV=1    |      |
| 28 | >sp P79105 S10AC_BOVIN Protein S100-A12 OS=Bos taurus GN=S100A12 PE=1 SV=3            |                                        | 0.07 |
| 29 | >sp Q95121 PEDF_BOVIN Pigment epithelium-derived factor OS=Bos taurus                 |                                        | 0.07 |
| 30 |                                                                                       | GN=SERPINF1 PE=1 SV=1                  |      |
| 31 | >tr F1MCF8 F1MCF8_BOVIN Uncharacterized protein OS=Bos taurus GN=IGLL1 PE=4           |                                        | 0.07 |
| 32 |                                                                                       | SV=2                                   |      |
| 33 | >tr F6S1Q0 F6S1Q0_BOVIN Uncharacterized protein OS=Bos taurus GN=KRT18 PE=3           |                                        | 0.07 |
| 34 |                                                                                       | SV=1                                   |      |
| 35 | >sp Q3Y5Z3 ADIPO_BOVIN Adiponectin OS=Bos taurus GN=ADIPOQ PE=1 SV=1                  |                                        | 0.07 |
| 36 | >sp P62998 RAC1_BOVIN Ras-related C3 botulinum toxin substrate 1 OS=Bos taurus        |                                        | 0.07 |
| 37 |                                                                                       | GN=RAC1 PE=1 SV=1                      |      |
| 38 | >sp P20959 IBP3_BOVIN Insulin-like growth factor-binding protein 3 OS=Bos taurus      |                                        | 0.06 |
| 39 |                                                                                       | GN=IGFBP3 PE=1 SV=3                    |      |
| 40 | >sp Q5E9F5 TAGL2_BOVIN Transgelin-2 OS=Bos taurus GN=TAGLN2 PE=2 SV=3                 |                                        | 0.06 |
| 41 | >sp Q0VC13 ADAL_BOVIN Adenosine deaminase-like protein OS=Bos taurus GN=ADAL          |                                        | 0.06 |
| 42 |                                                                                       | PE=2 SV=1                              |      |
| 43 | >sp P01045 KNG2_BOVIN Kininogen-2 OS=Bos taurus GN=KNG2 PE=1 SV=1                     |                                        | 0.06 |
| 44 | >tr J9ZW47 J9ZW47_BOVIN Integrin beta OS=Bos taurus PE=2 SV=1                         |                                        | 0.06 |
| 45 | >sp Q2KIG3 CBPB2_BOVIN Carboxypeptidase B2 OS=Bos taurus GN=CPB2 PE=1 SV=1            |                                        | 0.06 |
| 46 | >tr G3X6N3 G3X6N3_BOVIN Serotransferrin OS=Bos taurus GN=TF PE=4 SV=1                 |                                        | 0.06 |
| 47 | >Reverse >tr E1BMP3 E1BMP3_BOVIN Uncharacterized protein OS=Bos taurus                |                                        | 0.06 |
| 48 |                                                                                       | GN=MYLK3 PE=4 SV=2                     |      |
| 49 | >sp P11017 GBB2_BOVIN Guanine nucleotide-binding protein G(I)/G(S)/G(T) subunit       |                                        | 0.06 |
| 50 |                                                                                       | beta-2 OS=Bos taurus GN=GNB2 PE=2 SV=3 |      |
| 51 | >tr G3N2D7 G3N2D7_BOVIN Uncharacterized protein (Fragment) OS=Bos taurus              |                                        | 0.05 |
| 52 |                                                                                       | GN=IGLL1 PE=4 SV=1                     |      |
| 53 | >tr F1MRZ8 F1MRZ8_BOVIN Uncharacterized protein OS=Bos taurus GN=PLEK PE=4            |                                        | 0.05 |
| 54 |                                                                                       | SV=2                                   |      |
| 55 | >tr A6QPP9 A6QPP9_BOVIN PF4 protein OS=Bos taurus GN=PF4 PE=3 SV=1                    |                                        | 0.05 |
| 56 | >tr F1MDH3 F1MDH3_BOVIN Uncharacterized protein (Fragment) OS=Bos taurus              |                                        | 0.05 |
| 57 |                                                                                       | GN=TLN1 PE=4 SV=2                      |      |
| 58 | >tr Q9TS74 Q9TS74_BOVIN Pancreatic elastase inhibitor (Fragments) OS=Bos taurus       |                                        | 0.05 |
| 59 |                                                                                       |                                        |      |
| 60 |                                                                                       |                                        |      |



|    |                                                                                       |      |
|----|---------------------------------------------------------------------------------------|------|
| 1  |                                                                                       |      |
| 2  |                                                                                       |      |
| 3  |                                                                                       |      |
| 4  | PE=1 SV=1                                                                             |      |
| 5  | >tr G3MYZ3 G3MYZ3_BOVIN Uncharacterized protein OS=Bos taurus GN=AFM PE=4             | 0.05 |
| 6  | SV=1                                                                                  |      |
| 7  | >sp Q28065 C4BPA_BOVIN C4b-binding protein alpha chain OS=Bos taurus GN=C4BPA         | 0.05 |
| 8  | PE=2 SV=1                                                                             |      |
| 9  | >sp Q95122 CD14_BOVIN Monocyte differentiation antigen CD14 OS=Bos taurus             | 0.05 |
| 10 | GN=CD14 PE=2 SV=2                                                                     |      |
| 11 | >sp Q32KY0 APOD_BOVIN Apolipoprotein D OS=Bos taurus GN=APOD PE=2 SV=1                | 0.05 |
| 12 | >tr F1MQ37 F1MQ37_BOVIN Uncharacterized protein OS=Bos taurus GN=MYH9 PE=4            | 0.05 |
| 13 | SV=2                                                                                  |      |
| 14 | >tr K4JB97 K4JB97_BOVIN Alpha-2-macroglobulin variant 4 OS=Bos taurus GN=A2M          | 0.05 |
| 15 | PE=2 SV=1                                                                             |      |
| 16 | >tr F1MI18 F1MI18_BOVIN Uncharacterized protein OS=Bos taurus GN=LOC506828 PE=4       | 0.05 |
| 17 | SV=2                                                                                  |      |
| 18 | >tr A5PJ69 A5PJ69_BOVIN SERPINA10 protein OS=Bos taurus GN=SERPINA10 PE=2             | 0.05 |
| 19 | SV=1                                                                                  |      |
| 20 | >sp P13135 CPNS1_BOVIN Calpain small subunit 1 OS=Bos taurus GN=CAPNS1 PE=2           | 0.05 |
| 21 | SV=1                                                                                  |      |
| 22 | >Reverse >sp A5PJF6 HSDL1_BOVIN Inactive hydroxysteroid dehydrogenase-like            | 0.05 |
| 23 | protein 1 OS=Bos taurus GN=HSDL1 PE=2 SV=1                                            |      |
| 24 | >tr B8Y9S9 B8Y9S9_BOVIN Embryo-specific fibronectin 1 transcript variant OS=Bos       | 0.05 |
| 25 | taurus GN=FN1 PE=2 SV=1                                                               |      |
| 26 | >tr Q9XSW5 Q9XSW5_BOVIN Band 3 protein OS=Bos taurus GN=BEB3 PE=2 SV=1                | 0.05 |
| 27 | >sp Q3MHN2 CO9_BOVIN Complement component C9 OS=Bos taurus GN=C9 PE=2                 | 0.05 |
| 28 | SV=1                                                                                  |      |
| 29 | >tr O97941 O97941_BOVIN Complement component 3 (Fragment) OS=Bos taurus PE=2          | 0.04 |
| 30 | SV=1                                                                                  |      |
| 31 | >sp P01035 CYTC_BOVIN Cystatin-C OS=Bos taurus GN=CST3 PE=1 SV=2                      | 0.04 |
| 32 | >sp Q5XQN5 K2C5_BOVIN Keratin, type II cytoskeletal 5 OS=Bos taurus GN=KRT5 PE=1      | 0.04 |
| 33 | SV=1                                                                                  |      |
| 34 | >sp O62644 LECT2_BOVIN Leukocyte cell-derived chemotaxin-2 OS=Bos taurus              | 0.04 |
| 35 | GN=LECT2 PE=1 SV=1                                                                    |      |
| 36 | >sp Q08D85 PXDC1_BOVIN PX domain-containing protein 1 OS=Bos taurus GN=PXDC1          | 0.04 |
| 37 | PE=2 SV=1                                                                             |      |
| 38 | >tr Q3SYR0 Q3SYR0_BOVIN Serpin peptidase inhibitor, clade A (Alpha-1 antiproteinase,  | 0.04 |
| 39 | antitrypsin), member 7 OS=Bos taurus GN=SERPINA7 PE=2 SV=1                            |      |
| 40 | >tr Q32T06 Q32T06_BOVIN Endopin 2C OS=Bos taurus PE=2 SV=1                            | 0.04 |
| 41 | >sp Q5E9F7 COF1_BOVIN Cofilin-1 OS=Bos taurus GN=CFL1 PE=2 SV=3                       | 0.04 |
| 42 | >tr B0JYL8 B0JYL8_BOVIN Cofilin 1 (Non-muscle) OS=Bos taurus GN=CFL1 PE=2 SV=1        | 0.04 |
| 43 | >sp Q5E9B1 LDHB_BOVIN L-lactate dehydrogenase B chain OS=Bos taurus GN=LDHB           | 0.04 |
| 44 | PE=2 SV=4                                                                             |      |
| 45 | >sp P01044 KNG1_BOVIN Kininogen-1 OS=Bos taurus GN=KNG1 PE=1 SV=1                     | 0.04 |
| 46 | >Reverse >sp Q5ICW4 GRB14_BOVIN Growth factor receptor-bound protein 14 OS=Bos        | 0.03 |
| 47 | taurus GN=GRB14 PE=1 SV=1                                                             |      |
| 48 | >tr Q3ZC83 Q3ZC83_BOVIN Solute carrier family 29 (Nucleoside transporters), member 1  | 0.03 |
| 49 | OS=Bos taurus GN=SLC29A1 PE=2 SV=1                                                    |      |
| 50 | >tr O77679 O77679_BOVIN Glyceraldehyde 3-phosphate dehydrogenase (Fragment)           | 0.03 |
| 51 | OS=Bos taurus GN=G3PDH PE=2 SV=1                                                      |      |
| 52 | >sp P62739 ACTA_BOVIN Actin, aortic smooth muscle OS=Bos taurus GN=ACTA2 PE=1         | 0.03 |
| 53 | SV=1                                                                                  |      |
| 54 | >sp Q2TBI0 LBP_BOVIN Lipopolysaccharide-binding protein OS=Bos taurus GN=LBP          | 0.03 |
| 55 | PE=2 SV=1                                                                             |      |
| 56 | >sp P07224 PROS_BOVIN Vitamin K-dependent protein S OS=Bos taurus GN=PROS1            | 0.03 |
| 57 | PE=1 SV=1                                                                             |      |
| 58 | >sp P58352 GTR3_BOVIN Solute carrier family 2, facilitated glucose transporter member | 0.03 |
| 59 |                                                                                       |      |
| 60 |                                                                                       |      |

|    |                                                                                |      |
|----|--------------------------------------------------------------------------------|------|
| 1  | 3 OS=Bos taurus GN=SLC2A3 PE=2 SV=1                                            |      |
| 2  | >sp Q9BGI3 PRDX2_BOVIN Peroxiredoxin-2 OS=Bos taurus GN=PRDX2 PE=2 SV=1        | 0.03 |
| 3  | >sp E1BF81 CBG_BOVIN Corticosteroid-binding globulin OS=Bos taurus GN=SERPINA6 | 0.03 |
| 4  | PE=3 SV=1                                                                      |      |
| 5  | >tr Q17QH1 Q17QH1_BOVIN APOF protein OS=Bos taurus GN=APOF PE=2 SV=2           | 0.03 |
| 6  | >sp P62803 H4_BOVIN Histone H4 OS=Bos taurus PE=1 SV=2                         | 0.03 |
| 7  | >tr Q4H0Z3 Q4H0Z3_BOVIN Glyceraldehyde-3-phosphate dehydrogenase (Fragment)    | 0.03 |
| 8  | OS=Bos taurus GN=gapdh PE=3 SV=1                                               |      |
| 9  | >tr F1MC45 F1MC45_BOVIN Complement factor H (Fragment) OS=Bos taurus GN=CFH    | 0.03 |
| 10 | PE=4 SV=2                                                                      |      |
| 11 | >tr Q9TS85 Q9TS85_BOVIN Histidine-rich GLYCOPROTEIN=FACTOR XIIIa substrate     | 0.03 |
| 12 | (Fragments) OS=Bos taurus PE=1 SV=1                                            |      |
| 13 | >sp Q9XSJ4 ENOA_BOVIN Alpha-enolase OS=Bos taurus GN=ENO1 PE=1 SV=4            | 0.03 |
| 14 | >tr Q9XSN4 Q9XSN4_BOVIN Glyceraldehyde-3-phosphate dehydrogenase (Fragment)    | 0.03 |
| 15 | OS=Bos taurus GN=GAPDL17 PE=2 SV=1                                             |      |
| 16 | >sp Q3SWY2 ILK_BOVIN Integrin-linked protein kinase OS=Bos taurus GN=ILK PE=2  | 0.03 |
| 17 | SV=1                                                                           |      |
| 18 | >Reverse >sp P17810 PRPH2_BOVIN Peripherin-2 OS=Bos taurus GN=PRPH2 PE=1       | 0.03 |
| 19 | SV=1                                                                           |      |
| 20 | >sp P01888 B2MG_BOVIN Beta-2-microglobulin OS=Bos taurus GN=B2M PE=1 SV=2      | 0.03 |
| 21 | >Reverse >sp Q0IIE2 SHC1_BOVIN SHC-transforming protein 1 OS=Bos taurus        | 0.03 |
| 22 | GN=SHC1 PE=2 SV=1                                                              |      |
| 23 | >tr I7CT57 I7CT57_BOVIN Vitamin D binding protein OS=Bos taurus PE=2 SV=1      | 0.03 |
| 24 | >tr G3N2P6 G3N2P6_BOVIN Uncharacterized protein OS=Bos taurus GN=LOC101905591  | 0.03 |
| 25 | PE=3 SV=1                                                                      |      |
| 26 | >tr B0JYP6 B0JYP6_BOVIN IGK protein OS=Bos taurus GN=IGK PE=2 SV=1             | 0.03 |
| 27 | >sp Q5E9B7 CLIC1_BOVIN Chloride intracellular channel protein 1 OS=Bos taurus  | 0.03 |
| 28 | GN=CLIC1 PE=2 SV=3                                                             |      |
| 29 | >sp Q28107 FA5_BOVIN Coagulation factor V OS=Bos taurus GN=F5 PE=1 SV=1        | 0.03 |
| 30 | >tr G3MXL3 G3MXL3_BOVIN Uncharacterized protein (Fragment) OS=Bos taurus       | 0.03 |
| 31 | GN=KRT3 PE=3 SV=1                                                              |      |
| 32 | >tr F1MAV0 F1MAV0_BOVIN Fibrinogen beta chain OS=Bos taurus GN=FGB PE=4 SV=2   | 0.03 |
| 33 | >tr Q5I2B0 Q5I2B0_BOVIN Mannan-binding lectin A OS=Bos taurus GN=MBL-A PE=2    | 0.03 |
| 34 | SV=1                                                                           |      |
| 35 | >tr K4JDT2 K4JDT2_BOVIN Alpha-2-macroglobulin variant 20 OS=Bos taurus GN=A2M  | 0.02 |
| 36 | PE=2 SV=1                                                                      |      |
| 37 | >tr Q2KIH2 Q2KIH2_BOVIN ApoN protein OS=Bos taurus GN=ApoN PE=2 SV=1           | 0.02 |
| 38 | >tr F1MMD7 F1MMD7_BOVIN Inter-alpha-trypsin inhibitor heavy chain H4 OS=Bos    | 0.02 |
| 39 | taurus GN=ITIH4 PE=4 SV=2                                                      |      |
| 40 | >sp Q148H5 K2C71_BOVIN Keratin, type II cytoskeletal 71 OS=Bos taurus GN=KRT71 | 0.02 |
| 41 | PE=2 SV=1                                                                      |      |
| 42 | >sp P00432 CATA_BOVIN Catalase OS=Bos taurus GN=CAT PE=1 SV=3                  | 0.02 |
| 43 | >tr K4JBA2 K4JBA2_BOVIN Alpha-2-macroglobulin variant 9 OS=Bos taurus GN=A2M   | 0.02 |
| 44 | PE=2 SV=1                                                                      |      |
| 45 | >Reverse >tr E1BNR9 E1BNR9_BOVIN Uncharacterized protein OS=Bos taurus         | 0.02 |
| 46 | GN=SEMA7A PE=4 SV=1                                                            |      |
| 47 | >tr Q3ZBS5 Q3ZBS5_BOVIN Small proline-rich protein 3 OS=Bos taurus GN=SPRR3    | 0.02 |
| 48 | PE=2 SV=1                                                                      |      |
| 49 | >tr I3PGL3 I3PGL3_BOVIN Insulin-like growth factor 2 (Fragment) OS=Bos taurus  | 0.02 |
| 50 | GN=IGF2 PE=2 SV=1                                                              |      |
| 51 | >Reverse >tr E1BFJ1 E1BFJ1_BOVIN Uncharacterized protein OS=Bos taurus         | 0.02 |
| 52 | GN=TPRG1 PE=4 SV=1                                                             |      |
| 53 | >sp P02584 PROF1_BOVIN Profilin-1 OS=Bos taurus GN=PFN1 PE=1 SV=2              | 0.02 |
| 54 | >tr F1N789 F1N789_BOVIN Uncharacterized protein OS=Bos taurus GN=VCL PE=4 SV=1 | 0.02 |
| 55 | >sp P04985-3 ELN_BOVIN Isoform 3 of Elastin OS=Bos taurus GN=ELN               | 0.02 |

|    |                                                                                  |                                                                   |      |
|----|----------------------------------------------------------------------------------|-------------------------------------------------------------------|------|
| 1  |                                                                                  |                                                                   |      |
| 2  |                                                                                  |                                                                   |      |
| 3  | >Reverse                                                                         | >sp A5D7S3 TRM1L_BOVIN TRMT1-like protein OS=Bos taurus GN=TRMT1L | 0.02 |
| 4  |                                                                                  | PE=2 SV=1                                                         |      |
| 5  | >sp P50227 ST1A1_BOVIN Sulfotransferase 1A1 OS=Bos taurus GN=SULT1A1 PE=1        |                                                                   | 0.02 |
| 6  |                                                                                  | SV=2                                                              |      |
| 7  | >sp P12799 FIBG_BOVIN Fibrinogen gamma-B chain OS=Bos taurus GN=FGG PE=1         |                                                                   | 0.02 |
| 8  |                                                                                  | SV=1                                                              |      |
| 9  | >sp Q6B411 LYSM_BOVIN Lysozyme C, milk isozyme OS=Bos taurus PE=2 SV=1           |                                                                   | 0.02 |
| 10 | >sp P81948 TBA4A_BOVIN Tubulin alpha-4A chain OS=Bos taurus GN=TUBA4A PE=1       |                                                                   | 0.02 |
| 11 |                                                                                  | SV=2                                                              |      |
| 12 | >sp P19879 MIME_BOVIN Mimecan OS=Bos taurus GN=OGN PE=1 SV=2                     |                                                                   | 0.02 |
| 13 | >tr F1MSW0 F1MSW0_BOVIN Uncharacterized protein OS=Bos taurus GN=MEP1A PE=3      |                                                                   | 0.02 |
| 14 |                                                                                  | SV=2                                                              |      |
| 15 | >sp P13384 IBP2_BOVIN Insulin-like growth factor-binding protein 2 OS=Bos taurus |                                                                   | 0.02 |
| 16 |                                                                                  | GN=IGFBP2 PE=1 SV=2                                               |      |
| 17 | >sp Q3SWW8 TSP4_BOVIN Thrombospondin-4 OS=Bos taurus GN=THBS4 PE=2 SV=1          |                                                                   | 0.02 |
| 18 | >tr F1MFW9 F1MFW9_BOVIN Uncharacterized protein (Fragment) OS=Bos taurus         |                                                                   | 0.02 |
| 19 |                                                                                  | GN=KRT24 PE=3 SV=2                                                |      |
| 20 | >Reverse >tr E1B913 E1B913_BOVIN Uncharacterized protein OS=Bos taurus           |                                                                   | 0.02 |
| 21 |                                                                                  | GN=THNSL2 PE=4 SV=1                                               |      |
| 22 | >Reverse >tr A5D7Q2 A5D7Q2_BOVIN Putative uncharacterized protein OS=Bos taurus  |                                                                   | 0.02 |
| 23 |                                                                                  | PE=2 SV=1                                                         |      |
| 24 | >tr Q2KJJ7 Q2KJJ7_BOVIN Serine peptidase inhibitor, Kunitz type 1 OS=Bos taurus  |                                                                   | 0.02 |
| 25 |                                                                                  | GN=SPINT1 PE=2 SV=1                                               |      |
| 26 | >tr Q2KIF2 Q2KIF2_BOVIN Leucine-rich alpha-2-glycoprotein 1 OS=Bos taurus        |                                                                   | 0.02 |
| 27 |                                                                                  | GN=LRG1 PE=2 SV=1                                                 |      |
| 28 | >sp TRFE_HUMAN (Common contaminant protein)                                      |                                                                   | 0.02 |
| 29 | >sp Q5EAD2 SERA_BOVIN D-3-phosphoglycerate dehydrogenase OS=Bos taurus           |                                                                   | 0.02 |
| 30 |                                                                                  | GN=PHGDH PE=2 SV=3                                                |      |
| 31 | >tr A5D7E1 A5D7E1_BOVIN MGC139254 protein OS=Bos taurus GN=MGC139254 PE=2        |                                                                   | 0.02 |
| 32 |                                                                                  | SV=1                                                              |      |
| 33 | >sp P18902 RET4_BOVIN Retinol-binding protein 4 OS=Bos taurus GN=RBP4 PE=1 SV=1  |                                                                   | 0.02 |
| 34 | >tr F1MYX2 F1MYX2_BOVIN Uncharacterized protein OS=Bos taurus GN=APOM PE=4       |                                                                   | 0.02 |
| 35 |                                                                                  | SV=1                                                              |      |
| 36 | >sp A6H768 GALK1_BOVIN Galactokinase OS=Bos taurus GN=GALK1 PE=2 SV=2            |                                                                   | 0.02 |
| 37 | >sp ALBU_HUMAN (Common contaminant protein)                                      |                                                                   | 0.02 |
| 38 | >sp Q58DS5 RAB13_BOVIN Ras-related protein Rab-13 OS=Bos taurus GN=RAB13 PE=1    |                                                                   | 0.02 |
| 39 |                                                                                  | SV=1                                                              |      |
| 40 | >sp Q2TA29 RB11A_BOVIN Ras-related protein Rab-11A OS=Bos taurus GN=RAB11A       |                                                                   | 0.01 |
| 41 |                                                                                  | PE=2 SV=3                                                         |      |
| 42 | >sp P19120 HSP7C_BOVIN Heat shock cognate 71 kDa protein OS=Bos taurus           |                                                                   | 0.01 |
| 43 |                                                                                  | GN=HSPA8 PE=1 SV=2                                                |      |
| 44 | >tr Q2KIM6 Q2KIM6_BOVIN Glutathione transferase zeta 1 OS=Bos taurus GN=GSTZ1    |                                                                   | 0.01 |
| 45 |                                                                                  | PE=2 SV=1                                                         |      |
| 46 | >sp P01044-2 KNG1_BOVIN Isoform LMW of Kininogen-1 OS=Bos taurus GN=KNG1         |                                                                   | 0.01 |
| 47 | >Reverse >tr E1BHH6 E1BHH6_BOVIN Uncharacterized protein OS=Bos taurus           |                                                                   | 0.01 |
| 48 |                                                                                  | GN=PODN PE=4 SV=2                                                 |      |
| 49 | >sp Q32LP0 URP2_BOVIN Fermitin family homolog 3 OS=Bos taurus GN=FERMT3 PE=2     |                                                                   | 0.01 |
| 50 |                                                                                  | SV=1                                                              |      |
| 51 | >tr K4JDS3 K4JDS3_BOVIN Alpha-2-macroglobulin variant 10 OS=Bos taurus GN=A2M    |                                                                   | 0.01 |
| 52 |                                                                                  | PE=2 SV=1                                                         |      |
| 53 | >Reverse >tr E1BFA8 E1BFA8_BOVIN Uncharacterized protein OS=Bos taurus           |                                                                   | 0.01 |
| 54 |                                                                                  | GN=NBAS PE=4 SV=2                                                 |      |
| 55 | >tr G3N0G4 G3N0G4_BOVIN Uncharacterized protein (Fragment) OS=Bos taurus         |                                                                   | 0.01 |
| 56 |                                                                                  | GN=UNC79 PE=4 SV=1                                                |      |
| 57 | >sp Q8SPJ1 PLAK_BOVIN Junction plakoglobin OS=Bos taurus GN=JUP PE=2 SV=1        |                                                                   | 0.01 |
| 58 |                                                                                  |                                                                   |      |
| 59 |                                                                                  |                                                                   |      |
| 60 |                                                                                  |                                                                   |      |

|    |                                  |                                                                |      |
|----|----------------------------------|----------------------------------------------------------------|------|
| 1  |                                  |                                                                |      |
| 2  |                                  |                                                                |      |
| 3  | >tr F1MTT5 F1MTT5_BOVIN          | Uncharacterized protein (Fragment) OS=Bos taurus               | 0.01 |
| 4  | GN=LOC786996 PE=4 SV=2           |                                                                |      |
| 5  | >tr F1MIP7 F1MIP7_BOVIN          | Uncharacterized protein OS=Bos taurus GN=ABCC2 PE=3            | 0.01 |
| 6  | SV=2                             |                                                                |      |
| 7  | >tr F1MZ78 F1MZ78_BOVIN          | Uncharacterized protein (Fragment) OS=Bos taurus               | 0.01 |
| 8  | GN=LRRCC1 PE=4 SV=2              |                                                                |      |
| 9  | >Reverse >tr E1BDX2 E1BDX2_BOVIN | Uncharacterized protein OS=Bos taurus                          | 0.01 |
| 10 | GN=LRRCC8B PE=4 SV=1             |                                                                |      |
| 11 | >tr F1MZX6 F1MZX6_BOVIN          | Uncharacterized protein OS=Bos taurus GN=MYH13 PE=4            | 0.01 |
| 12 | SV=2                             |                                                                |      |
| 13 | >sp Q3SZD7 CBR1_BOVIN            | Carbonyl reductase [NADPH] 1 OS=Bos taurus GN=CBR1             | 0.01 |
| 14 | PE=2 SV=1                        |                                                                |      |
| 15 | >tr A6QQA8 A6QQA8_BOVIN          | Sulfhydryl oxidase OS=Bos taurus GN=QSOX1 PE=2 SV=1            | 0.01 |
| 16 | >tr G3MYU2 G3MYU2_BOVIN          | Uncharacterized protein OS=Bos taurus GN=KRT77 PE=3            | 0.01 |
| 17 | SV=1                             |                                                                |      |
| 18 | >tr E1BCW0 E1BCW0_BOVIN          | Uncharacterized protein (Fragment) OS=Bos taurus               | 0.01 |
| 19 | GN=HGFAAC PE=3 SV=2              |                                                                |      |
| 20 | >Reverse >tr E1BAT8 E1BAT8_BOVIN | Uncharacterized protein OS=Bos taurus                          | 0.01 |
| 21 | GN=KIF20B PE=3 SV=1              |                                                                |      |
| 22 | >tr K4JF16 K4JF16_BOVIN          | Alpha-2-macroglobulin variant 23 OS=Bos taurus GN=A2M          | 0.01 |
| 23 | PE=2 SV=1                        |                                                                |      |
| 24 | >tr Q09TE3 Q09TE3_BOVIN          | Insulin-like growth factor binding protein acid labile subunit | 0.01 |
| 25 | OS=Bos taurus PE=2 SV=1          |                                                                |      |
| 26 | >tr E1BCH9 E1BCH9_BOVIN          | Uncharacterized protein OS=Bos taurus GN=VCPIP1 PE=4           | 0.01 |
| 27 | SV=2                             |                                                                |      |
| 28 | >sp P98140 FA12_BOVIN            | Coagulation factor XII OS=Bos taurus GN=F12 PE=1 SV=2          | 0.01 |
| 29 | >sp P81287 ANXA5_BOVIN           | Annexin A5 OS=Bos taurus GN=ANXA5 PE=1 SV=3                    | 0.01 |
| 30 | >tr E1BNS9 E1BNS9_BOVIN          | L-lactate dehydrogenase OS=Bos taurus GN=LDHC PE=3             | 0.01 |
| 31 | SV=2                             |                                                                |      |
| 32 | >tr E1BI98 E1BI98_BOVIN          | Uncharacterized protein OS=Bos taurus GN=COL6A1 PE=4           | 0.01 |
| 33 | SV=1                             |                                                                |      |
| 34 | >tr Q17R18 Q17R18_BOVIN          | Adenosine kinase OS=Bos taurus GN=ADK PE=2 SV=1                | 0.01 |
| 35 | >tr A7MBH9 A7MBH9_BOVIN          | GNAI2 protein OS=Bos taurus GN=GNAI2 PE=2 SV=1                 | 0.01 |
| 36 | >sp Q27970 CAN1_BOVIN            | Calpain-1 catalytic subunit OS=Bos taurus GN=CAPN1 PE=1        | 0.01 |
| 37 | SV=3                             |                                                                |      |
| 38 | >tr F1MRD0 F1MRD0_BOVIN          | Actin, cytoplasmic 1 OS=Bos taurus GN=ACTB PE=3 SV=2           | 0.01 |
| 39 | >sp P33433 HRG_BOVIN             | Histidine-rich glycoprotein (Fragments) OS=Bos taurus          | 0.01 |
| 40 | GN=HRG PE=1 SV=1                 |                                                                |      |
| 41 | >tr K4JDR8 K4JDR8_BOVIN          | Alpha-2-macroglobulin variant 5 OS=Bos taurus GN=A2M           | 0.01 |
| 42 | PE=2 SV=1                        |                                                                |      |
| 43 | >Reverse >tr F1N413 F1N413_BOVIN | Uncharacterized protein (Fragment) OS=Bos taurus               | 0.01 |
| 44 | GN=EHMT2 PE=3 SV=2               |                                                                |      |
| 45 | >Reverse >tr G3X7P4 G3X7P4_BOVIN | Uncharacterized protein (Fragment) OS=Bos                      | 0.01 |
| 46 | taurus GN=SHANK3 PE=4 SV=1       |                                                                |      |
| 47 | >sp Q3MHL4 SAHH_BOVIN            | Adenosylhomocysteinase OS=Bos taurus GN=AHCY PE=2              | 0.01 |
| 48 | SV=3                             |                                                                |      |
| 49 | >sp Q2HJ86 TBA1D_BOVIN           | Tubulin alpha-1D chain OS=Bos taurus GN=TUBA1D PE=1            | 0.01 |
| 50 | SV=1                             |                                                                |      |
| 51 | >sp Q0VCM5 ITIH1_BOVIN           | Inter-alpha-trypsin inhibitor heavy chain H1 OS=Bos taurus     | 0.01 |
| 52 | GN=ITIH1 PE=2 SV=1               |                                                                |      |
| 53 | >tr Q2KJB3 Q2KJB3_BOVIN          | Angiotensin-like 3 OS=Bos taurus GN=ANGPTL3 PE=2               | 0.01 |
| 54 | SV=1                             |                                                                |      |
| 55 | >tr A6QLB7 A6QLB7_BOVIN          | Adenylyl cyclase-associated protein OS=Bos taurus              | 0.01 |
| 56 | GN=CAP1 PE=2 SV=1                |                                                                |      |
| 57 | >sp P11151 LIPL_BOVIN            | Lipoprotein lipase OS=Bos taurus GN=LPL PE=1 SV=2              | 0.01 |
| 58 |                                  |                                                                |      |
| 59 |                                  |                                                                |      |
| 60 |                                  |                                                                |      |

1  
2  
3  
4  
5  
6  
7  
8  
9  
10  
11  
12  
13  
14  
15  
16  
17  
18  
19  
20  
21  
22  
23  
24  
25  
26  
27  
28  
29  
30  
31  
32  
33  
34  
35  
36  
37  
38  
39  
40  
41  
42  
43  
44  
45  
46  
47  
48  
49  
50  
51  
52  
53  
54  
55  
56  
57  
58  
59  
60

---

|                                                                                                                                                         |      |
|---------------------------------------------------------------------------------------------------------------------------------------------------------|------|
| >tr A5PJT7 A5PJT7_BOVIN ECM1 protein OS=Bos taurus GN=ECM1 PE=2 SV=1                                                                                    | 0.01 |
| >tr F1MY85 F1MY85_BOVIN Complement C5a anaphylatoxin OS=Bos taurus GN=C5<br>PE=4 SV=2                                                                   | 0.01 |
| >tr Q5EA54 Q5EA54_BOVIN Solute carrier family 3 (Activators of dibasic and neutral<br>amino acid transport), member 2 OS=Bos taurus GN=SLC3A2 PE=2 SV=1 | 0.01 |
| >Reverse >sp E1BP74 MARF1_BOVIN Meiosis arrest female protein 1 OS=Bos taurus<br>GN=MARF1 PE=3 SV=2                                                     | 0.01 |

---

**Table S3.** Full hard corona proteins associated with SPIONs incubated in StemPro® media, as identified by LC MS/MS (data for 3 individual samples were provided).

### Sample 1

| Description                                                                                | NpSp<br>C |
|--------------------------------------------------------------------------------------------|-----------|
| >sp ALBU_HUMAN (Common contaminant protein)                                                | 69.91     |
| >sp Q2TBU0 HPT_BOVIN Haptoglobin OS=Bos taurus GN=HP PE=2 SV=1                             | 2.59      |
| >sp P18902 RET4_BOVIN Retinol-binding protein 4 OS=Bos taurus GN=RBP4 PE=1 SV=1            | 2.51      |
| >tr Q3ZBQ9 Q3ZBQ9_BOVIN APOM protein OS=Bos taurus GN=APOM PE=4 SV=1                       | 1.87      |
| >sp P60712 ACTB_BOVIN Actin, cytoplasmic 1 OS=Bos taurus GN=ACTB PE=1 SV=1                 | 1.61      |
| >sp Q03247 APOE_BOVIN Apolipoprotein E OS=Bos taurus GN=APOE PE=2 SV=1                     | 1.53      |
| >sp Q3ZCF0 DCTN2_BOVIN Dynactin subunit 2 OS=Bos taurus GN=DCTN2 PE=2 SV=1                 | 1.32      |
| >tr F1MMW8 F1MMW8_BOVIN Serum amyloid A protein OS=Bos taurus GN=M-SAA3.2<br>PE=3 SV=1     | 1.29      |
| >sp P19035 APOC3_BOVIN Apolipoprotein C-III OS=Bos taurus GN=APOC3 PE=1 SV=2               | 1.01      |
| >sp P15497 APOA1_BOVIN Apolipoprotein A-I OS=Bos taurus GN=APOA1 PE=1 SV=3                 | 1.00      |
| >sp Q3SX14 GELS_BOVIN Gelsolin OS=Bos taurus GN=GSN PE=2 SV=1                              | 0.86      |
| >tr Q3SYR8 Q3SYR8_BOVIN Immunoglobulin J chain OS=Bos taurus GN=IGJ PE=2<br>SV=1           | 0.77      |
| >sp P37141 GPX3_BOVIN Glutathione peroxidase 3 OS=Bos taurus GN=GPX3 PE=2<br>SV=2          | 0.75      |
| >tr A4FV94 A4FV94_BOVIN KRT6A protein OS=Bos taurus GN=KRT6A PE=2 SV=1                     | 0.72      |
| >sp Q32PJ2 APOA4_BOVIN Apolipoprotein A-IV OS=Bos taurus GN=APOA4 PE=2 SV=1                | 0.70      |
| >sp P61223 RAP1B_BOVIN Ras-related protein Rap-1b OS=Bos taurus GN=RAP1B PE=2<br>SV=1      | 0.66      |
| >tr A5D7R6 A5D7R6_BOVIN ITIH2 protein OS=Bos taurus GN=ITIH2 PE=2 SV=1                     | 0.64      |
| >sp P41361 ANT3_BOVIN Antithrombin-III OS=Bos taurus GN=SERPINC1 PE=1 SV=2                 | 0.62      |
| >sp P00735 THRB_BOVIN Prothrombin OS=Bos taurus GN=F2 PE=1 SV=2                            | 0.62      |
| >sp Q32L76 SAA4_BOVIN Serum amyloid A-4 protein OS=Bos taurus GN=SAA4 PE=2<br>SV=1         | 0.56      |
| >tr Q2KIW1 Q2KIW1_BOVIN Paraoxonase 1 OS=Bos taurus GN=PON1 PE=2 SV=1                      | 0.54      |
| >sp Q513B1 IOD3_BOVIN Type III iodothyronine deiodinase OS=Bos taurus GN=DIO3<br>PE=2 SV=3 | 0.48      |
| >sp Q3MHN5 VTDB_BOVIN Vitamin D-binding protein OS=Bos taurus GN=GC PE=2<br>SV=1           | 0.46      |
| >sp Q7YRD0 PNO1_BOVIN RNA-binding protein PNO1 OS=Bos taurus GN=PNO1 PE=2<br>SV=1          | 0.38      |
| >sp P01030 CO4_BOVIN Complement C4 (Fragments) OS=Bos taurus GN=C4 PE=1 SV=2               | 0.37      |
| >sp Q3MHN2 CO9_BOVIN Complement component C9 OS=Bos taurus GN=C9 PE=2<br>SV=1              | 0.35      |
| >sp P12763 FETUA_BOVIN Alpha-2-HS-glycoprotein OS=Bos taurus GN=AHSG PE=1<br>SV=2          | 0.34      |
| >sp Q7SIH1 A2MG_BOVIN Alpha-2-macroglobulin OS=Bos taurus GN=A2M PE=1 SV=2                 | 0.30      |
| >sp Q2TBI0 LBP_BOVIN Lipopolysaccharide-binding protein OS=Bos taurus GN=LBP<br>PE=2 SV=1  | 0.30      |
| >sp P17690 APOH_BOVIN Beta-2-glycoprotein 1 OS=Bos taurus GN=APOH PE=1 SV=4                | 0.28      |
| >sp P00978 AMBP_BOVIN Protein AMBP OS=Bos taurus GN=AMBP PE=1 SV=2                         | 0.27      |
| >tr Q1JQD3 Q1JQD3_BOVIN Paraoxonase 3 OS=Bos taurus GN=PON3 PE=2 SV=1                      | 0.27      |
| >sp Q0II64 SUN3_BOVIN SUN domain-containing protein 3 OS=Bos taurus GN=SUN3<br>PE=2 SV=2   | 0.27      |
| >sp Q32PE3 SELK_BOVIN Selenoprotein K OS=Bos taurus GN=SELK PE=3 SV=3                      | 0.25      |

|    |                                                                                   |      |
|----|-----------------------------------------------------------------------------------|------|
| 1  |                                                                                   |      |
| 2  |                                                                                   |      |
| 3  | >sp P19034 APOC2_BOVIN Apolipoprotein C-II OS=Bos taurus GN=APOC2 PE=1 SV=2       | 0.24 |
| 4  | >sp Q28178 TSP1_BOVIN Thrombospondin-1 OS=Bos taurus GN=THBS1 PE=2 SV=2           | 0.23 |
| 5  | >sp P07224 PROS_BOVIN Vitamin K-dependent protein S OS=Bos taurus GN=PROS1        | 0.21 |
| 6  | PE=1 SV=1                                                                         |      |
| 7  | >sp Q0VCM5 ITIH1_BOVIN Inter-alpha-trypsin inhibitor heavy chain H1 OS=Bos taurus | 0.21 |
| 8  | GN=ITIH1 PE=2 SV=1                                                                |      |
| 9  | >sp Q05443 LUM_BOVIN Lumican OS=Bos taurus GN=LUM PE=1 SV=1                       | 0.21 |
| 10 | >sp P68103 EF1A1_BOVIN Elongation factor 1-alpha 1 OS=Bos taurus GN=EEF1A1 PE=2   | 0.21 |
| 11 | SV=1                                                                              |      |
| 12 | >tr A4IFF6 A4IFF6_BOVIN NEK3 protein OS=Bos taurus GN=NEK3 PE=2 SV=1              | 0.20 |
| 13 | >sp Q2KJ63 KLKB1_BOVIN Plasma kallikrein OS=Bos taurus GN=KLKB1 PE=2 SV=1         | 0.19 |
| 14 | >tr A6QP30 A6QP30_BOVIN CPN2 protein OS=Bos taurus GN=CPN2 PE=2 SV=1              | 0.18 |
| 15 | >sp P02676 FIBB_BOVIN Fibrinogen beta chain OS=Bos taurus GN=FGB PE=1 SV=2        | 0.15 |
| 16 | >sp Q2KJF1 A1BG_BOVIN Alpha-1B-glycoprotein OS=Bos taurus GN=A1BG PE=1 SV=1       | 0.14 |
| 17 | >tr A7MBF9 A7MBF9_BOVIN CNDP1 protein OS=Bos taurus GN=CNDP1 PE=2 SV=1            | 0.14 |
| 18 | >tr A7YWQ8 A7YWQ8_BOVIN DDX28 protein OS=Bos taurus GN=DDX28 PE=2 SV=1            | 0.13 |
| 19 | >sp P33433 HRG_BOVIN Histidine-rich glycoprotein (Fragments) OS=Bos taurus        | 0.12 |
| 20 | GN=HRG PE=1 SV=1                                                                  |      |
| 21 | >sp Q2KIS7 TETN_BOVIN Tetranectin OS=Bos taurus GN=CLEC3B PE=2 SV=1               | 0.12 |
| 22 | >sp Q28065 C4BPA_BOVIN C4b-binding protein alpha chain OS=Bos taurus GN=C4BPA     | 0.12 |
| 23 | PE=2 SV=1                                                                         |      |
| 24 | >sp Q95121 PEDF_BOVIN Pigment epithelium-derived factor OS=Bos taurus             | 0.12 |
| 25 | GN=SERPINF1 PE=1 SV=1                                                             |      |
| 26 | >tr F1MKS5 F1MKS5_BOVIN Histidine-rich glycoprotein OS=Bos taurus GN=HRG PE=4     | 0.09 |
| 27 | SV=2                                                                              |      |
| 28 | >tr Q2KIQ1 Q2KIQ1_BOVIN Phosphoglucomutase 3 OS=Bos taurus GN=PGM3 PE=2           | 0.09 |
| 29 | SV=1                                                                              |      |
| 30 | >sp Q3T052 ITIH4_BOVIN Inter-alpha-trypsin inhibitor heavy chain H4 OS=Bos taurus | 0.08 |
| 31 | GN=ITIH4 PE=1 SV=1                                                                |      |
| 32 | >sp Q0VCX1 C1S_BOVIN Complement C1s subcomponent OS=Bos taurus GN=C1S             | 0.07 |
| 33 | PE=2 SV=2                                                                         |      |
| 34 | >tr A5D9E9 A5D9E9_BOVIN Complement component 1, r subcomponent OS=Bos taurus      | 0.07 |
| 35 | GN=C1R PE=2 SV=1                                                                  |      |
| 36 | >sp Q28107 FA5_BOVIN Coagulation factor V OS=Bos taurus GN=F5 PE=1 SV=1           | 0.05 |
| 37 | >sp P56652 ITIH3_BOVIN Inter-alpha-trypsin inhibitor heavy chain H3 OS=Bos taurus | 0.05 |
| 38 | GN=ITIH3 PE=1 SV=2                                                                |      |
| 39 | >sp Q29RU4 CO6_BOVIN Complement component C6 OS=Bos taurus GN=C6 PE=2 SV=1        | 0.05 |
| 40 | >tr Q58DL9 Q58DL9_BOVIN Phospholipid transfer protein OS=Bos taurus GN=PLTP       | 0.05 |
| 41 | PE=2 SV=1                                                                         |      |
| 42 | >sp P06868 PLMN_BOVIN Plasminogen OS=Bos taurus GN=PLG PE=1 SV=2                  | 0.03 |
| 43 | >sp P07589 FINC_BOVIN Fibronectin OS=Bos taurus GN=FN1 PE=1 SV=4                  | 0.02 |

## Sample 2

| Description                                                                  | NpSpC |
|------------------------------------------------------------------------------|-------|
| >sp ALBU_HUMAN (Common contaminant protein)                                  | 71.97 |
| >sp P19035 APOC3_BOVIN Apolipoprotein C-III OS=Bos taurus GN=APOC3 PE=1 SV=2 | 3.68  |
| >sp Q2TBU0 HPT_BOVIN Haptoglobin OS=Bos taurus GN=HP PE=2 SV=1               | 2.20  |
| >tr Q3ZBQ9 Q3ZBQ9_BOVIN APOM protein OS=Bos taurus GN=APOM PE=4 SV=1         | 2.03  |
| >sp P18902 RET4_BOVIN Retinol-binding protein 4 OS=Bos taurus GN=RBP4 PE=1   | 1.29  |
| SV=1                                                                         |       |
| >sp P60712 ACTB_BOVIN Actin, cytoplasmic 1 OS=Bos taurus GN=ACTB PE=1 SV=1   | 1.26  |
| >sp P19034 APOC2_BOVIN Apolipoprotein C-II OS=Bos taurus GN=APOC2 PE=1 SV=2  | 1.17  |

|    |                                                                                                      |      |
|----|------------------------------------------------------------------------------------------------------|------|
| 1  | >tr Q2KIW1 Q2KIW1_BOVIN Paraoxonase 1 OS=Bos taurus GN=PON1 PE=2 SV=1                                | 1.16 |
| 2  | >sp Q3ZCF0 DCTN2_BOVIN Dynactin subunit 2 OS=Bos taurus GN=DCTN2 PE=2 SV=1                           | 1.10 |
| 3  | >sp Q03247 APOE_BOVIN Apolipoprotein E OS=Bos taurus GN=APOE PE=2 SV=1                               | 1.03 |
| 4  | >sp P15497 APOA1_BOVIN Apolipoprotein A-I OS=Bos taurus GN=APOA1 PE=1 SV=3                           | 0.89 |
| 5  | >sp Q3SX14 GELS_BOVIN Gelsolin OS=Bos taurus GN=GSN PE=2 SV=1                                        | 0.89 |
| 6  | >tr A5D7R6 A5D7R6_BOVIN ITIH2 protein OS=Bos taurus GN=ITIH2 PE=2 SV=1                               | 0.84 |
| 7  | >sp P35541 SAA_BOVIN Serum amyloid A protein OS=Bos taurus GN=SAA1 PE=1 SV=2                         | 0.68 |
| 8  | >tr B0JYP6 B0JYP6_BOVIN IGK protein OS=Bos taurus GN=IGK PE=2 SV=1                                   | 0.61 |
| 9  | >tr Q1JQD3 Q1JQD3_BOVIN Paraoxonase 3 OS=Bos taurus GN=PON3 PE=2 SV=1                                | 0.58 |
| 10 | >sp P12763 FETUA_BOVIN Alpha-2-HS-glycoprotein OS=Bos taurus GN=AHSG PE=1 SV=2                       | 0.57 |
| 11 | >sp P41361 ANT3_BOVIN Antithrombin-III OS=Bos taurus GN=SERPINC1 PE=1 SV=2                           | 0.57 |
| 12 | >tr Q3SYR8 Q3SYR8_BOVIN Immunoglobulin J chain OS=Bos taurus GN=IGJ PE=2 SV=1                        | 0.56 |
| 13 | >sp P37141 GPX3_BOVIN Glutathione peroxidase 3 OS=Bos taurus GN=GPX3 PE=2 SV=2                       | 0.52 |
| 14 | >sp P00735 THRB_BOVIN Prothrombin OS=Bos taurus GN=F2 PE=1 SV=2                                      | 0.52 |
| 15 | >sp Q3MHN5 VTDB_BOVIN Vitamin D-binding protein OS=Bos taurus GN=GC PE=2 SV=1                        | 0.50 |
| 16 | >sp Q32PJ2 APOA4_BOVIN Apolipoprotein A-IV OS=Bos taurus GN=APOA4 PE=2 SV=1                          | 0.47 |
| 17 | >sp Q32L76 SAA4_BOVIN Serum amyloid A-4 protein OS=Bos taurus GN=SAA4 PE=2 SV=1                      | 0.46 |
| 18 | >sp Q32PH8 EF1A2_BOVIN Elongation factor 1-alpha 2 OS=Bos taurus GN=EEF1A2 PE=2 SV=1                 | 0.45 |
| 19 | >tr A4FV94 A4FV94_BOVIN KRT6A protein OS=Bos taurus GN=KRT6A PE=2 SV=1                               | 0.41 |
| 20 | >sp Q0VCM5 ITIH1_BOVIN Inter-alpha-trypsin inhibitor heavy chain H1 OS=Bos taurus GN=ITIH1 PE=2 SV=1 | 0.36 |
| 21 | >sp Q7SIH1 A2MG_BOVIN Alpha-2-macroglobulin OS=Bos taurus GN=A2M PE=1 SV=2                           | 0.33 |
| 22 | >tr A6QPP2 A6QPP2_BOVIN SERPIND1 protein OS=Bos taurus GN=SERPIND1 PE=2 SV=1                         | 0.30 |
| 23 | >sp Q2KJF1 A1BG_BOVIN Alpha-1B-glycoprotein OS=Bos taurus GN=A1BG PE=1 SV=1                          | 0.23 |
| 24 | >sp Q2KJ63 KLKB1_BOVIN Plasma kallikrein OS=Bos taurus GN=KLKB1 PE=2 SV=1                            | 0.23 |
| 25 | >sp Q3T052 ITIH4_BOVIN Inter-alpha-trypsin inhibitor heavy chain H4 OS=Bos taurus GN=ITIH4 PE=1 SV=1 | 0.19 |
| 26 | >sp Q2TBI0 LBP_BOVIN Lipopolysaccharide-binding protein OS=Bos taurus GN=LBP PE=2 SV=1               | 0.18 |
| 27 | >tr A7MBF9 A7MBF9_BOVIN CNDP1 protein OS=Bos taurus GN=CNDP1 PE=2 SV=1                               | 0.17 |
| 28 | >tr Q2KIQ1 Q2KIQ1_BOVIN Phosphoglucomutase 3 OS=Bos taurus GN=PGM3 PE=2 SV=1                         | 0.16 |
| 29 | >sp Q3MHN2 CO9_BOVIN Complement component C9 OS=Bos taurus GN=C9 PE=2 SV=1                           | 0.16 |
| 30 | >sp P61223 RAP1B_BOVIN Ras-related protein Rap-1b OS=Bos taurus GN=RAP1B PE=2 SV=1                   | 0.16 |
| 31 | >sp P07589 FINC_BOVIN Fibronectin OS=Bos taurus GN=FN1 PE=1 SV=4                                     | 0.15 |
| 32 | >sp P06868 PLMN_BOVIN Plasminogen OS=Bos taurus GN=PLG PE=1 SV=2                                     | 0.15 |
| 33 | >sp Q95121 PEDF_BOVIN Pigment epithelium-derived factor OS=Bos taurus GN=SERPINF1 PE=1 SV=1          | 0.14 |
| 34 | >tr F1N3A1 F1N3A1_BOVIN Thrombospondin-1 OS=Bos taurus GN=THBS1 PE=4 SV=1                            | 0.13 |
| 35 | >sp Q8SPJ1 PLAK_BOVIN Junction plakoglobin OS=Bos taurus GN=JUP PE=2 SV=1                            | 0.12 |



1  
2  
3  
4  
5  
6  
7  
8  
9  
10  
11  
12  
13  
14  
15  
16  
17  
18  
19  
20  
21  
22  
23  
24  
25  
26  
27  
28  
29  
30  
31  
32  
33  
34  
35  
36  
37  
38  
39  
40  
41  
42  
43  
44  
45  
46  
47  
48  
49  
50  
51  
52  
53  
54  
55  
56  
57  
58  
59  
60

---

|                                                                                                    |      |
|----------------------------------------------------------------------------------------------------|------|
| >sp P07224 PROS_BOVIN Vitamin K-dependent protein S OS=Bos taurus GN=PROS1<br>PE=1 SV=1            | 0.09 |
| >sp P17690 APOH_BOVIN Beta-2-glycoprotein 1 OS=Bos taurus GN=APOH PE=1 SV=4                        | 0.09 |
| >tr Q2KIK9 Q2KIK9_BOVIN Complement component 8, beta polypeptide OS=Bos taurus<br>GN=C8B PE=2 SV=1 | 0.08 |
| >sp P33433 HRG_BOVIN Histidine-rich glycoprotein (Fragments) OS=Bos taurus<br>GN=HRG PE=1 SV=1     | 0.07 |
| >tr F1MKS5 F1MKS5_BOVIN Histidine-rich glycoprotein OS=Bos taurus GN=HRG PE=4<br>SV=2              | 0.05 |
| >sp Q28065 C4BPA_BOVIN C4b-binding protein alpha chain OS=Bos taurus<br>GN=C4BPA PE=2 SV=1         | 0.05 |

---

1  
2  
3 **Figure S1:** *In vitro* evaluation of ferumoxytol-uptake by hMSCs (a) DAB-Prussian blue staining  
4 of unlabeled hMSCs (control) and hMSC labeled with ferumoxytol in StemPro®, FBS, HS,  
5 protamine, and protamine + heparin containing media. (b) The corresponding average amount of  
6 iron per cell, as measured by ICP-OES analysis.  
7  
8  
9  
10  
11

12 **Figure S2:** Ferumoxytol compartmentalization in hMSC after exposure to different labeling  
13 media: LysoTracker® Red DND-99 immunofluorescent stains for lysosomes/endosomes (red) in  
14 hMSC labeled with ferumoxytol in StemPro®, FBS, HS, protamine, and protamine + heparin  
15 containing media. All cells exposure to ferumoxytol show increased numbers of lysosomes/  
16 endosomes compared to controls (DAPI represents cell nucleus; Red fluorescent demonstrates  
17 lysosomes/endosomes; 100µm scale bar).  
18  
19  
20  
21  
22  
23  
24  
25  
26  
27  
28  
29  
30  
31  
32  
33  
34  
35  
36  
37  
38  
39  
40  
41  
42  
43  
44  
45  
46  
47  
48  
49  
50  
51  
52  
53  
54  
55  
56  
57  
58  
59  
60

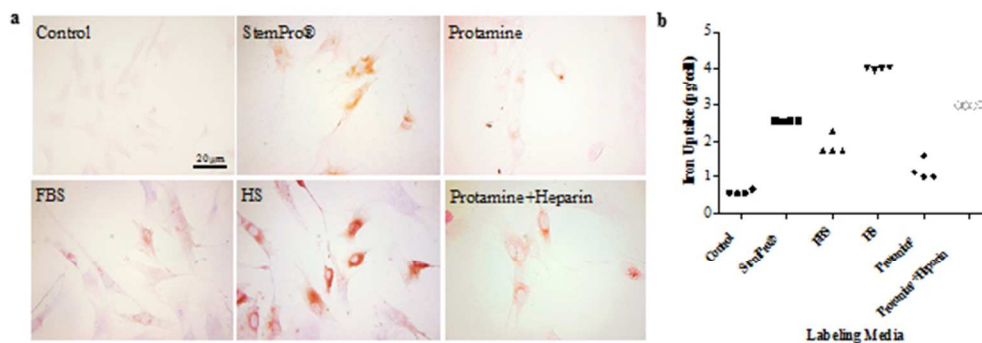

Figure S1: In vitro evaluation of ferumoxytol-uptake by hMSCs (a) DAB-Prussian blue staining of unlabeled hMSCs (control) and hMSC labeled with ferumoxytol in StemPro®, FBS, HS, protamine, and protamine + heparin containing media. (b) The corresponding average amount of iron per cell, as measured by ICP-OES analysis.

220x77mm (72 x 72 DPI)

1  
2  
3  
4  
5  
6  
7  
8  
9  
10  
11  
12  
13  
14  
15  
16  
17  
18  
19  
20  
21  
22  
23  
24  
25  
26  
27  
28  
29  
30  
31  
32  
33  
34  
35  
36  
37  
38  
39  
40  
41  
42  
43  
44  
45  
46  
47  
48  
49  
50  
51  
52  
53  
54  
55  
56  
57  
58  
59  
60

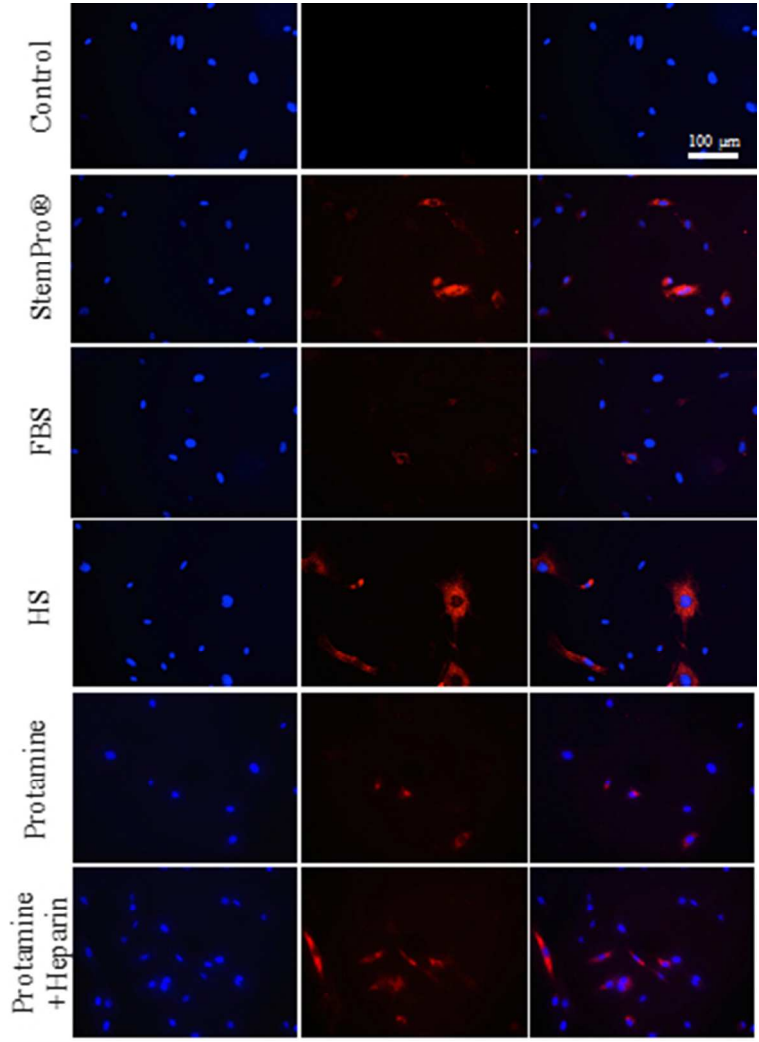

Figure S2: Ferumoxytol compartmentalization in hMSC after exposure to different labeling media: LysoTracker® Red DND-99 immunofluorescent stains for lysosomes (red) in hMSC labeled with ferumoxytol in StemPro®, FBS, HS, protamine, and protamine + heparin containing media. All cells exposure to ferumoxytol show increased numbers of lysosomes compared to controls (DAPI represents cell nucleus; Red fluorescent demonstrates lysosomes; 100µm scale bar).

134x182mm (72 x 72 DPI)
